# Supplementary material for: Assessing turbine passage effects on internal fish injury and delayed mortality using X-ray imaging
Source: PeerJ journal article supplement (doi:10.7717/peerj.9977), 2020-09-16
Supplement: 2020-05-11_Fig_A1_Internal_injury_Protocol_english_MM.pdf [file 2020-05-11_Fig_A1_Internal_injury_Protocol_english_MM.pdf]

**Internal fish injury protocol**

**Site:** \_\_\_\_\_ **Date of x-ray:** \_\_\_\_\_ **Settings:** \_\_\_\_\_ kV, \_\_\_\_\_ sec

**Species:**  Brown trout  Grayling  Danube salmon  Eel  Barbel  Perch  Roach **Fish ID:** \_\_\_\_\_

|                               | Fractures | Deformations | Compressions | Swim bladder anomalies | Emphysema/<br>free intraperitoneal gas | Fluid accumulations | Radiopaque materials |
|-------------------------------|-----------|--------------|--------------|------------------------|----------------------------------------|---------------------|----------------------|
| Skull                         |           |              |              |                        |                                        |                     |                      |
| Head soft tissue              |           |              |              |                        |                                        |                     |                      |
| Eyes                          |           |              |              |                        |                                        |                     |                      |
| Precaudal vertebrae           |           |              |              |                        |                                        |                     |                      |
| Spines of precaudal vertebrae |           |              |              |                        |                                        |                     |                      |
| Ribs                          |           |              |              |                        |                                        |                     |                      |
| Pterygiophores                |           |              |              |                        |                                        |                     |                      |
| Body cavity                   |           |              |              |                        |                                        |                     |                      |
| Body soft tissue              |           |              |              |                        |                                        |                     |                      |
| Swim bladder                  |           |              |              |                        |                                        |                     |                      |
| Caudal vertebrae              |           |              |              |                        |                                        |                     |                      |
| Spines of caudal vertebrae    |           |              |              |                        |                                        |                     |                      |
| Soft tissue caudal area       |           |              |              |                        |                                        |                     |                      |

**Evaluating person:** \_\_\_\_\_ **Date of evaluation:** \_\_\_\_\_

Crossed boxes: respective injury types do not apply to respective part of the body.

Chief investigator: Prof. Dr. J. Geist

Designated veterinarian: Dr. H. Kliem
