# Supplementary material for: Assessing turbine passage effects on internal fish injury and delayed mortality using X-ray imaging
Source: PeerJ. 2020 Sep 16;8:e9977. doi: 10.7717/peerj.9977 (PMC7501806; doi:10.7717/peerj.9977)
Supplement: Supplemental Information 2 [file peerj-08-9977-s002.xlsx]

## Sheet: Internal injury raw data
Fish ID	Vitality0h	Vitality96h	Anal_fin_Amputations	Anal_fin_Tears	Anal_fin_Hemorrhages	Anal_fin_Pigment_anomalies	Anal_fin_Emboli	Eye_right_Amputations	Eye_right_Hemorrhages	Eye_right_Bruises	Eye_right_Emboli	Eye_left_Amputations	Eye_left_Hemorrhages	Eye_left_Bruises	Eye_left_Emboli	Ventral_fin_right_Amputations	Ventral_fin_right_Tears	Ventral_fin_right_Hemorrhages	Ventral_fin_right_Emboli	Ventral_fin_right_Pigment_anomalies	Ventral_fin_left_Amputations	Ventral_fin_left_Tears	Ventral_fin_left_Hemorrhages	Ventral_fin_left_Emboli	Ventral_fin_left_Pigment_anomalies	Pectoral_fin_right_Amputations	Pectoral_fin_right_Tears	Pectoral_fin_right_Hemorrhages	Pectoral_fin_right_Pigment_anomalies	Pectoral_fin_right_Emboli	Pectoral_fin_left_Amputations	Pectoral_fin_left_Tears	Pectoral_fin_left_Hemorrhages	Pectoral_fin_left_Pigment_anomalies	Pectoral_fin_left_Emboli	Operculum_left_Amputations	Operculum_left_Hemorrhages	Operculum_left_Bruises	Operculum_left_Dermal_lesions	Operculum_left_Pigment_anomalies	Operculum_right_Amputations	Operculum_right_Hemorrhages	Operculum_right_Bruises	Operculum_right_Dermal_lesions	Operculum_right_Pigment_anomalies	Head_Amputations	Head_Hemorrhages	Head_Bruises	Head_Dermal_lesions
37794	5	0	0	0	0	0	0	0	0	0	0	0	0	0	0	0	0	0	0	0	0	0	0	0	0	0	0	0	0	0	0	0	0	0	0	0	0	0	0	0	0	0	0	0	0	0	0	0	0
37795	5	0	0	0	0	0	0	0	0	0	0	0	0	0	0	0	0	0	0	0	0	1	0	0	0	0	0	0	0	0	0	0	0	0	0	0	0	0	0	0	0	0	0	0	0	0	0	0	0
37796	5	0	0	0	0	0	0	0	0	0	0	0	0	0	0	0	0	0	0	0	0	0	0	0	0	0	0	0	0	0	0	0	0	0	0	0	0	0	0	0	0	0	0	0	0	0	0	0	0
34809	0	0	0	0	0	0	0	0	0	0	0	0	0	0	0	0	0	0	0	0	0	3	0	0	0	0	0	0	0	0	0	0	0	0	0	0	0	0	0	0	0	0	0	0	0	0	0	0	0
34810	0	0	0	0	0	0	0	0	0	0	0	0	0	0	0	0	0	0	0	0	0	0	0	0	0	0	0	0	0	0	0	0	0	0	0	0	0	0	0	0	0	0	0	0	0	0	0	0	0
34819	0	0	0	0	0	0	0	0	0	0	0	0	0	0	0	0	0	0	0	0	0	0	0	0	0	0	0	0	0	0	0	1	0	0	0	0	0	0	0	0	0	0	0	0	0	0	0	0	0
34820	0	0	0	0	0	0	0	0	0	0	0	0	0	0	0	0	0	0	0	0	0	0	0	0	0	0	0	0	0	0	0	0	0	0	0	0	0	0	0	0	0	0	0	0	0	0	0	0	0
27797	0	5	0	0	0	0	0	0	0	0	0	0	0	0	0	0	1	0	0	0	0	1	0	0	0	0	3	0	0	0	0	3	0	0	0	0	0	0	0	0	0	0	0	0	0	0	0	0	0
27786	5	0	0	1	0	0	0	0	1	0	0	5	0	0	0	0	0	0	0	0	0	0	0	0	0	0	1	0	0	0	0	1	0	0	0	0	3	0	0	0	0	0	0	0	0	0	0	0	1
27787	5	0	5	0	0	0	0	0	0	0	0	0	0	0	0	0	1	0	0	0	0	1	1	0	0	0	3	0	0	0	0	3	0	0	0	0	1	0	1	0	0	1	0	1	0	0	0	0	1
27788	5	0	0	1	0	0	0	0	0	0	0	0	0	0	0	0	1	0	0	0	0	1	0	0	0	0	1	0	0	0	0	1	0	0	0	0	1	0	0	0	0	0	0	0	0	0	0	0	0
28923	0	0	0	1	0	0	0	0	0	0	0	0	0	0	0	0	1	0	0	0	0	1	0	0	0	0	1	1	0	0	0	1	0	0	0	0	0	0	0	0	0	0	0	0	0	0	0	0	0
28924	0	0	0	3	0	0	0	0	0	0	0	0	0	0	0	0	1	0	0	0	0	1	0	0	0	0	1	0	0	0	0	3	1	0	0	0	1	0	1	0	0	0	0	0	0	0	0	0	0
28926	0	0	0	1	0	0	0	0	0	0	0	0	0	0	0	0	1	0	0	0	0	1	0	0	0	0	1	0	0	0	0	1	0	0	0	0	0	0	0	0	0	0	0	0	0	1	1	0	0
28927	0	0	0	1	0	0	0	0	0	0	0	0	0	0	0	0	1	0	0	0	0	1	0	0	0	0	1	0	0	0	0	1	0	0	0	0	0	0	0	0	0	0	0	0	0	0	0	0	0
28922	0	5	0	1	0	0	0	0	0	0	0	0	0	0	0	0	1	0	0	0	0	1	0	0	0	0	1	0	0	0	0	1	0	0	0	0	0	0	0	0	0	0	0	1	0	0	0	0	0
28928	0	0	0	1	0	0	0	0	0	0	0	0	0	0	0	0	1	0	0	0	0	1	0	0	0	0	1	1	0	0	0	1	0	0	0	0	0	0	0	0	0	0	0	0	0	0	0	0	1
52220	0	0	0	0	0	0	0	0	0	0	0	0	0	0	0	0	3	0	0	0	0	0	0	0	0	0	3	0	0	0	0	0	0	0	0	0	0	0	0	0	0	0	0	0	0	0	0	0	0
27760	0	0	0	0	0	0	0	0	0	0	0	0	0	0	0	0	0	0	0	0	0	0	0	0	0	0	0	0	0	0	0	1	1	0	0	0	0	0	0	0	0	0	0	0	0	0	0	0	1
38510	5	0	0	1	0	0	0	0	0	0	0	0	0	0	0	0	1	0	0	0	0	1	0	0	0	0	1	0	0	0	0	1	1	0	0	0	0	0	0	0	0	0	0	0	0	0	0	0	0
52045	0	0	0	0	0	0	0	0	0	0	0	0	0	0	0	0	1	0	0	0	0	1	0	0	0	0	1	0	0	0	0	1	0	0	0	0	0	0	0	0	0	0	0	0	0	0	0	0	0
27757	0	0	0	0	0	0	0	0	0	0	0	0	0	0	0	0	1	0	0	0	0	1	0	0	0	0	1	0	0	0	0	1	0	0	0	0	0	0	0	0	0	0	0	0	0	0	0	0	0
27758	0	0	0	0	0	0	0	0	0	0	0	0	0	0	0	0	0	0	0	0	0	0	0	0	0	0	1	0	0	0	0	1	0	0	0	0	0	0	0	0	0	0	0	0	0	0	0	0	0
27759	0	0	0	0	0	0	0	0	0	0	0	0	0	0	0	0	0	0	0	0	0	0	0	0	0	0	1	0	0	0	0	1	0	0	0	0	0	0	1	0	0	0	0	0	0	0	0	0	0
52213	0	0	0	1	0	0	0	0	0	0	0	0	0	0	0	0	3	0	0	0	0	1	0	0	0	0	1	0	0	0	0	3	0	0	0	0	0	0	0	0	0	0	0	0	0	0	0	0	0
28898	0	0	0	1	0	0	0	0	0	0	0	0	0	0	0	0	3	0	0	0	0	3	0	0	0	0	3	0	0	0	0	3	0	0	0	0	0	0	0	0	0	1	0	1	0	0	1	0	0
28902	0	0	0	1	0	0	0	0	0	0	0	0	0	0	0	0	1	0	0	0	0	1	0	0	0	0	3	0	0	0	0	3	0	0	0	0	0	0	0	0	0	1	0	1	0	0	0	0	1
48169	0	0	0	1	0	0	0	0	0	0	0	0	0	0	0	0	1	0	0	0	0	1	0	0	0	1	1	1	0	0	1	1	1	0	0	0	0	0	0	0	0	1	0	0	0	0	0	0	0
48170	0	0	0	1	1	0	0	0	0	0	0	0	0	0	0	0	1	0	0	0	0	1	0	0	0	1	3	1	0	0	1	1	0	0	0	0	0	0	0	0	0	0	0	0	0	0	0	0	0
48171	0	0	1	3	0	0	0	0	0	0	0	0	0	0	0	0	1	0	0	0	0	1	0	0	0	0	3	1	0	0	0	1	0	0	0	0	0	0	0	0	0	0	0	0	0	0	0	0	0
48172	0	0	0	3	0	0	0	0	0	0	0	0	0	0	0	0	3	0	0	0	0	0	1	0	0	0	3	0	0	0	0	1	0	0	0	1	1	0	0	0	0	0	0	0	0	0	1	0	1
52215	0	0	0	1	0	0	0	0	0	0	0	0	0	0	0	0	0	0	0	0	0	3	1	0	0	0	1	0	0	0	0	0	0	0	0	0	0	0	0	0	0	0	0	0	0	0	0	0	0
52037	5	0	0	0	0	0	0	0	0	0	0	0	0	0	0	0	0	0	0	0	0	0	0	0	0	0	1	0	0	0	1	3	0	0	0	0	0	0	0	0	0	0	0	0	0	5	0	0	0
52038	5	0	0	5	0	0	0	0	0	0	0	0	0	0	0	0	1	0	0	0	0	1	0	0	0	0	1	0	0	0	0	1	0	0	0	0	0	0	0	0	0	0	0	0	0	0	0	0	0
38548	5	0	0	0	0	0	0	0	0	0	0	0	0	0	0	0	3	0	0	0	0	0	0	0	0	0	0	0	0	0	0	3	0	0	0	0	0	0	0	0	0	0	0	0	0	0	0	0	1
27735	0	0	0	0	0	0	0	0	0	0	0	0	0	0	0	0	1	0	0	0	0	0	0	0	0	0	0	0	0	0	0	1	1	0	0	0	0	0	0	0	0	0	0	0	0	0	0	0	1
27782	5	0	0	0	0	0	0	0	0	0	0	0	0	0	0	0	1	1	0	0	0	1	1	0	0	0	3	0	0	0	0	3	0	0	0	0	0	0	0	0	0	0	0	0	0	0	0	0	0
27783	5	0	0	0	0	0	0	0	0	0	0	0	0	0	0	0	1	0	0	0	0	1	0	0	0	0	1	0	0	0	0	1	0	0	0	0	0	0	0	0	0	0	0	0	0	0	0	0	1
27784	5	0	0	0	0	0	0	5	1	0	0	0	0	0	0	0	5	0	0	0	0	1	0	0	0	0	3	0	0	0	0	3	0	0	0	0	0	0	0	0	0	0	0	0	0	0	1	0	0
27785	5	0	0	0	0	0	0	0	0	0	0	5	0	0	0	0	1	1	0	0	0	1	1	0	0	0	3	1	0	0	0	3	1	0	0	1	3	0	3	0	1	3	0	3	0	0	3	0	0
48173	0	0	0	3	0	0	0	0	0	0	0	0	0	0	0	0	0	0	0	0	0	1	0	0	0	1	3	1	0	0	1	3	1	0	0	0	0	0	0	0	0	1	0	0	0	0	1	0	1
38502	0	0	0	1	0	0	0	0	0	0	0	0	0	0	0	0	1	0	0	0	0	1	0	0	0	0	1	0	0	0	0	0	0	0	0	0	0	0	0	0	0	0	0	0	0	0	0	0	1
38497	0	5	0	0	0	0	0	0	0	0	0	0	0	0	0	0	1	0	0	0	0	3	0	0	0	0	1	1	0	0	0	1	0	0	0	0	0	0	0	0	0	0	0	0	0	0	1	0	0
48029	5	0	0	0	0	0	0	5	0	0	0	5	0	0	0	0	1	0	0	0	0	1	0	0	0	0	1	1	0	0	0	1	0	0	0	0	0	0	0	1	0	0	0	0	1	1	0	0	3
48030	5	0	0	1	0	0	0	0	0	0	0	0	0	0	0	0	1	0	0	0	0	1	0	0	0	5	0	0	0	0	5	0	0	0	0	0	0	0	0	0	0	0	0	0	0	0	0	0	0
48047	0	0	0	1	0	0	0	0	0	0	0	0	0	0	0	0	5	0	0	0	0	5	0	0	0	0	3	0	0	0	0	3	0	0	0	0	0	0	0	0	5	0	0	0	0	0	0	0	1
52225	0	0	0	0	0	0	0	0	0	0	0	0	0	0	0	0	1	0	0	0	0	3	0	0	0	0	1	0	0	0	0	0	0	0	0	0	0	0	0	0	0	0	0	0	0	0	0	0	0
52226	0	0	0	0	0	0	0	0	0	0	0	0	0	0	0	0	3	0	0	0	0	1	0	0	0	0	1	0	0	0	0	3	0	0	0	0	0	0	0	0	0	0	0	0	0	0	0	0	0
38511	5	0	0	3	0	0	0	0	5	5	0	0	3	5	0	0	1	0	0	0	0	5	0	0	0	1	1	0	0	0	0	1	0	0	0	0	0	0	0	0	0	0	0	0	0	0	0	0	1
38512	5	0	0	0	0	0	0	0	0	0	0	0	0	0	0	0	3	0	0	0	0	3	0	0	0	0	1	0	0	0	0	3	0	0	0	0	0	0	0	0	0	0	0	0	0	0	1	0	0
38513	5	0	0	1	0	0	0	0	0	0	0	0	0	0	0	0	1	0	0	0	0	3	0	0	0	0	1	0	0	0	0	3	0	0	0	1	0	0	1	0	1	0	0	1	0	0	0	0	0
38514	5	0	0	3	0	0	0	0	0	3	0	0	0	3	0	0	1	0	0	0	0	1	0	0	0	0	1	0	0	0	0	1	0	0	0	0	0	0	0	0	0	0	0	0	0	0	1	0	0
38515	5	0	0	1	0	0	0	5	0	0	0	0	0	1	0	0	1	0	0	0	0	1	0	0	0	0	1	0	0	0	1	1	0	0	0	0	0	0	0	0	1	0	1	0	0	0	1	0	1
28865	5	0	0	1	0	0	0	0	0	0	0	0	0	0	0	0	1	0	0	0	0	1	0	0	0	0	1	0	0	0	0	3	1	0	0	0	0	0	0	0	0	0	0	0	0	0	0	0	0
28866	5	0	0	0	0	0	0	5	0	0	0	0	0	0	0	0	0	0	0	0	0	0	0	0	0	0	3	0	0	0	0	3	0	0	0	0	0	0	0	0	0	0	0	0	0	0	1	0	1
28867	5	0	0	0	0	0	0	0	0	0	0	0	0	0	0	0	0	0	0	0	0	0	0	0	0	0	1	0	0	0	0	1	0	0	0	0	1	0	1	0	0	0	0	0	0	0	1	0	1
28868	5	0	0	1	3	0	0	0	0	0	0	0	0	0	0	0	0	1	0	0	0	0	1	0	0	0	1	1	0	0	0	1	1	0	0	0	0	0	0	0	0	0	0	0	0	0	1	0	1
38516	5	0	0	0	0	0	0	0	0	0	0	0	0	0	0	0	0	0	0	0	0	0	0	0	0	0	1	0	0	0	0	1	0	0	0	0	0	0	0	0	0	0	0	0	0	0	0	1	1
38517	5	0	0	0	0	0	0	0	0	0	0	0	0	0	0	0	5	0	0	0	0	3	0	0	0	0	3	0	0	0	0	3	0	0	0	0	0	0	0	0	0	0	0	0	0	0	1	0	1
38518	5	0	0	1	0	0	0	0	0	0	0	0	0	0	0	0	1	0	0	0	0	1	0	0	0	0	1	0	0	0	0	1	0	0	0	0	0	0	0	0	0	0	0	0	0	0	0	0	0
38519	5	0	0	1	0	0	0	0	1	3	0	0	3	5	0	0	0	0	0	0	0	0	0	0	0	0	1	1	0	0	0	1	1	0	0	0	0	0	0	0	0	0	0	0	0	0	0	0	0
38520	5	0	0	1	0	0	0	0	0	0	0	0	0	0	0	0	0	0	0	0	0	1	0	0	0	0	1	0	0	0	0	1	0	0	0	0	0	0	0	0	0	0	0	1	0	0	1	0	1
27766	0	0	0	0	0	0	0	0	0	0	0	0	0	0	0	0	3	0	0	0	0	1	0	0	0	0	1	0	0	0	0	1	0	0	0	0	0	0	0	0	0	0	0	0	0	0	0	0	0
27769	0	0	0	0	0	0	0	0	0	0	0	0	0	0	0	0	0	0	0	0	0	0	0	0	0	0	1	0	0	0	0	1	0	0	0	0	1	0	1	0	0	0	0	1	0	0	1	0	1
48002	5	0	0	5	0	0	0	0	0	0	0	0	0	0	0	0	1	0	0	0	0	1	0	0	0	0	1	0	0	0	0	1	0	0	0	0	0	0	0	0	0	0	0	0	0	3	0	0	0
48003	5	0	0	3	0	0	0	0	0	0	0	0	0	0	0	0	1	0	0	0	0	1	0	0	0	0	3	0	0	0	0	3	0	0	0	0	0	0	0	0	0	0	0	0	0	0	0	0	0
48004	5	0	0	3	0	0	0	0	0	0	0	0	0	0	0	0	3	0	0	0	1	5	0	0	0	0	5	0	0	0	0	3	0	0	0	0	0	0	0	0	0	0	0	0	0	0	0	0	0
48005	5	0	0	5	0	0	0	0	0	0	0	0	0	0	0	0	3	0	0	0	0	1	0	0	0	0	1	0	0	0	0	1	0	0	0	0	0	0	0	0	0	0	0	0	0	5	0	0	0
48006	5	0	0	1	0	0	0	0	0	0	0	0	0	0	0	0	1	0	0	0	0	1	0	0	0	0	1	0	0	0	1	1	0	0	0	0	0	0	0	0	0	0	0	0	0	5	0	0	0
27812	0	0	0	0	0	0	0	0	0	0	1	0	0	0	0	0	1	0	0	0	0	3	0	0	0	0	1	0	0	0	0	3	0	0	0	0	0	0	0	0	0	0	0	0	0	0	0	0	0
28889	5	0	0	1	0	0	0	0	0	0	0	0	0	0	0	0	3	0	0	0	0	3	0	0	0	0	3	0	0	0	0	3	1	0	0	0	0	0	3	0	0	0	0	3	0	0	0	0	3
38383	0	0	0	0	0	0	0	0	0	0	0	0	0	0	0	0	0	0	0	0	0	0	0	0	0	0	5	0	0	0	0	1	0	0	0	0	0	0	0	0	0	0	0	0	0	0	0	0	0
38384	0	0	0	0	0	0	0	0	0	0	0	0	0	0	0	0	3	0	0	0	0	1	0	0	0	0	1	0	0	0	0	1	0	0	0	0	0	0	0	0	0	0	0	0	0	0	0	0	0
38503	0	0	0	1	0	0	0	0	0	0	0	0	0	0	0	0	0	0	0	0	0	0	0	0	0	0	1	0	0	0	0	1	0	0	0	0	0	0	0	0	0	0	0	0	0	0	0	0	0
38504	0	0	0	1	0	0	0	0	0	0	0	0	0	0	0	0	1	0	0	0	0	1	0	0	0	0	3	0	0	0	1	1	0	0	0	0	0	0	0	0	0	0	0	0	0	0	0	0	0
38583	5	0	0	3	0	0	0	0	0	0	0	0	0	0	0	0	3	0	0	0	0	3	0	0	0	1	3	0	0	0	0	3	0	0	0	0	0	0	0	0	0	0	0	0	0	0	3	0	0
38584	5	0	0	1	0	0	0	0	0	0	0	0	0	0	0	0	3	0	0	0	0	1	0	0	0	0	3	0	0	0	0	3	0	0	0	0	0	0	0	0	0	0	0	1	0	0	3	0	3
38521	5	0	0	1	0	0	0	0	0	0	0	0	0	0	0	0	0	0	0	0	0	1	0	0	0	0	0	0	0	0	0	0	0	0	0	0	0	0	0	0	0	0	0	0	0	0	0	0	0
38522	5	0	0	1	0	0	0	0	0	0	0	0	0	0	0	0	1	0	0	0	0	0	0	0	0	0	3	0	0	0	0	1	0	0	0	0	1	0	1	0	0	0	0	0	0	0	0	0	0
38523	5	0	0	1	0	0	0	0	0	0	0	0	0	0	0	0	1	0	0	0	0	1	0	0	0	1	1	0	0	0	1	1	0	0	0	0	0	0	0	0	0	0	0	0	0	0	0	0	0
38524	5	0	0	1	0	0	0	0	0	0	0	0	0	0	0	0	5	0	0	0	0	1	0	0	0	0	1	1	0	0	0	1	0	0	0	1	1	0	0	0	0	0	0	0	0	0	0	0	0
38525	5	0	0	1	0	0	0	0	0	0	0	0	0	0	0	0	5	0	0	0	0	1	0	0	0	0	1	0	0	0	0	1	0	0	0	0	0	0	0	0	0	0	0	0	0	0	1	0	0
28809	0	0	0	0	0	0	0	0	0	0	0	0	0	0	1	0	0	0	0	0	0	1	0	0	0	0	1	1	0	0	0	5	0	0	0	0	0	0	0	0	0	0	0	0	0	0	0	0	0
28810	0	0	0	0	0	0	0	0	0	0	0	0	0	0	0	0	1	0	0	0	0	1	0	0	0	1	1	0	0	0	0	3	1	0	0	0	0	0	0	0	0	0	0	0	1	0	1	0	1
27770	0	0	0	0	0	0	0	0	0	0	0	0	0	0	0	0	0	0	0	0	0	3	0	0	0	0	1	0	0	0	0	1	0	0	0	0	0	0	0	0	0	0	0	0	0	0	0	0	1
52206	0	0	0	0	0	0	0	0	0	0	0	0	0	0	0	0	0	0	0	0	0	0	0	0	0	0	0	0	0	0	0	0	0	0	0	0	0	0	1	0	0	0	0	1	0	0	0	0	0
27772	0	0	0	0	0	0	0	0	0	0	0	0	0	0	0	0	0	0	0	0	0	0	0	0	0	0	0	0	0	0	0	0	0	0	0	0	0	0	0	0	0	0	0	0	0	0	0	0	0
27773	0	5	0	0	0	0	0	0	0	0	0	0	0	0	0	0	0	0	0	0	0	0	0	0	0	0	3	0	0	0	0	3	0	0	0	0	0	0	0	0	0	0	0	0	0	0	0	0	1
27387	0	0	0	0	1	0	0	0	0	0	0	0	0	0	0	0	0	1	0	0	0	3	1	0	0	0	0	0	0	0	0	0	0	0	0	0	1	0	0	0	0	1	0	0	0	0	1	0	0
38401	0	0	0	0	0	0	0	0	0	0	0	0	0	0	0	0	0	0	0	0	0	0	0	0	0	0	0	0	0	0	0	0	0	0	0	0	1	0	0	0	0	0	0	0	0	0	0	0	0
38526	5	0	0	1	0	0	0	0	0	0	0	0	0	0	0	0	1	0	0	0	0	1	0	0	0	0	0	0	0	0	0	0	0	0	0	0	0	0	0	0	0	0	0	0	0	5	0	0	0
38527	5	0	0	1	0	0	0	0	0	0	0	0	0	0	0	0	0	0	0	0	0	0	0	0	0	0	1	0	0	0	0	1	0	0	0	0	0	0	0	0	0	0	0	0	0	5	0	0	0
38528	5	0	0	3	0	0	0	0	0	0	0	0	0	1	0	0	1	0	0	0	0	1	0	0	0	1	1	1	0	0	0	1	0	0	0	0	0	0	0	0	0	0	0	0	0	5	1	0	0
38529	5	0	0	1	0	0	0	0	1	0	0	0	0	0	0	0	1	0	0	0	0	1	0	0	0	0	1	1	0	0	0	1	0	0	0	0	0	0	0	0	0	0	0	0	0	5	0	0	5
38530	5	0	0	3	0	0	0	0	0	0	0	0	0	0	0	0	1	0	0	0	0	1	0	0	0	1	1	0	0	0	1	1	0	0	0	5	0	0	0	0	5	0	0	0	0	5	0	0	0
48073	0	0	0	1	0	0	0	0	0	0	0	0	0	0	0	0	1	0	0	0	0	3	0	0	0	1	3	1	0	0	1	3	0	0	0	0	0	0	0	0	0	0	0	0	0	0	0	0	0
52193	0	5	0	1	0	0	0	0	0	0	0	0	0	0	0	0	0	1	0	0	0	0	0	0	0	0	3	0	0	0	0	3	1	0	0	0	0	0	0	0	0	0	0	0	0	0	0	0	0
28813	5	0	0	1	0	0	0	0	0	0	0	0	0	0	0	0	3	0	0	0	0	0	0	0	0	0	1	0	0	0	0	1	0	0	0	0	0	0	0	0	0	0	0	0	0	0	0	0	0
28814	5	0	1	3	0	0	0	0	0	0	0	0	0	0	0	0	3	0	0	0	0	1	0	0	0	0	1	0	0	0	0	3	0	0	0	0	0	0	0	1	0	0	0	0	1	0	1	0	0
28815	5	0	0	1	0	0	0	0	0	0	1	0	0	0	0	0	1	0	0	0	0	1	0	0	0	1	3	1	0	0	1	3	1	0	0	0	0	0	0	1	0	0	0	0	1	0	0	0	0
28816	5	0	0	0	0	0	0	0	0	0	0	0	0	0	0	0	0	0	0	0	0	0	0	0	0	0	1	1	0	0	0	1	0	0	0	0	0	0	0	0	0	0	0	0	0	0	1	0	0
28817	5	0	0	5	0	0	0	0	0	0	0	0	0	0	0	0	1	0	0	0	0	1	0	0	0	0	3	1	0	0	0	3	0	0	0	0	0	0	0	0	0	0	0	0	0	0	0	0	0
48031	5	0	0	0	0	0	0	0	0	0	0	0	0	0	0	0	1	0	0	0	0	1	0	0	0	0	5	0	0	0	0	5	0	0	0	0	0	0	0	3	0	0	0	0	3	0	0	1	0
48032	5	0	0	3	0	0	0	0	0	0	0	0	0	0	0	0	1	0	0	0	0	1	0	0	0	0	3	0	0	0	0	3	0	0	0	0	0	0	0	0	0	0	0	0	0	0	0	1	0
48033	5	0	0	5	0	0	0	0	0	0	0	0	0	0	0	0	1	0	0	0	0	1	0	0	0	0	3	1	0	0	0	3	0	0	0	0	0	0	0	1	0	0	0	0	1	0	0	0	0
48001	5	0	0	3	0	1	0	0	0	0	0	0	0	0	0	0	1	0	0	0	0	1	0	0	0	0	1	0	0	0	1	1	1	0	0	0	1	0	0	1	0	0	0	0	0	0	0	0	0
28819	5	0	0	1	0	0	0	0	0	0	0	0	0	0	0	0	1	0	0	0	0	1	0	0	0	1	1	0	0	0	0	1	0	0	0	0	0	0	0	0	0	0	0	0	0	5	0	0	0
28820	5	0	0	1	0	0	0	0	0	3	0	0	0	0	0	0	1	0	0	0	0	0	0	0	0	1	1	0	0	0	1	1	0	0	0	0	0	0	0	0	0	0	0	0	0	0	0	0	1
28821	5	0	0	0	0	0	0	0	0	0	0	0	0	0	0	0	1	0	0	0	0	5	0	0	0	0	1	0	0	0	1	1	0	0	0	0	0	0	0	0	0	0	0	0	0	0	1	0	0
52197	0	0	0	1	0	0	0	0	0	0	0	0	0	0	0	0	0	0	0	0	0	0	0	0	0	0	0	0	0	0	1	0	0	0	0	0	0	0	0	0	0	0	0	0	0	0	0	0	0
28822	5	0	0	1	0	0	0	0	0	0	0	0	0	3	0	0	0	0	0	0	0	0	0	0	0	0	3	0	0	0	1	3	1	0	0	0	0	0	0	0	0	0	0	0	0	5	0	0	0
28823	0	0	0	3	0	0	0	0	0	0	0	0	0	0	0	0	5	0	0	0	0	0	0	0	0	1	1	0	0	0	1	1	0	0	0	0	0	0	0	0	0	0	0	0	0	0	0	0	1
28824	0	0	0	3	0	0	0	0	0	0	0	0	0	0	0	0	0	0	0	0	0	0	0	0	0	0	1	0	0	0	0	1	0	0	0	0	0	0	0	0	0	0	0	0	0	0	0	0	0
28825	0	0	0	0	0	0	0	0	0	0	0	0	0	0	0	0	0	0	0	0	0	0	0	0	0	0	3	0	0	0	1	1	0	0	0	0	0	0	0	0	0	0	0	0	0	0	1	0	0
52161	0	0	0	0	0	0	0	0	0	0	0	0	0	0	0	0	0	0	0	0	0	0	0	0	0	0	3	0	0	0	0	1	0	0	0	0	0	0	0	0	0	0	0	0	0	0	0	0	0
48010	0	5	0	0	0	0	0	0	0	0	0	0	0	0	0	0	3	0	0	0	0	0	0	0	0	0	3	0	0	0	0	5	1	0	0	0	0	0	0	0	0	0	0	0	0	0	0	0	0
52201	5	0	0	1	0	0	0	3	0	0	0	0	3	0	0	0	0	0	0	0	0	0	0	0	0	0	1	0	0	0	0	1	0	0	0	0	0	0	0	0	0	0	0	0	0	0	0	0	0
52202	0	0	0	0	0	0	0	0	0	0	0	0	0	0	0	0	1	0	0	0	0	0	0	0	0	0	0	0	0	0	0	0	0	0	0	0	0	0	0	0	0	0	0	0	0	0	0	0	0
28869	5	0	0	0	0	0	0	0	0	0	0	0	0	0	0	0	0	0	0	0	0	0	0	0	0	0	3	1	0	0	0	3	1	0	0	3	1	0	0	0	0	0	0	0	0	0	3	0	3
28870	5	0	0	1	0	0	0	0	0	0	0	0	0	0	0	0	1	0	0	0	0	1	0	0	0	0	1	0	0	0	0	1	0	0	0	0	0	0	0	0	1	0	0	3	0	0	1	0	0
28871	5	0	0	3	0	0	0	0	0	0	0	0	0	0	0	0	1	1	0	0	0	1	1	0	0	0	3	0	0	0	0	3	0	0	0	0	0	0	0	0	0	0	0	0	0	0	1	0	1
28872	5	0	0	1	0	0	0	5	0	0	0	0	0	0	0	0	1	0	0	0	0	1	0	0	0	0	3	0	0	0	1	3	0	0	0	0	0	0	0	0	0	0	0	0	0	3	0	0	0
28873	5	0	0	1	0	0	0	0	0	0	0	0	0	0	0	0	1	0	0	0	0	1	0	0	0	0	1	0	0	0	0	1	0	0	0	0	0	0	0	0	0	0	0	0	0	0	0	0	3
28874	5	0	0	1	0	0	0	0	0	0	0	0	0	0	0	0	1	0	0	0	0	1	0	0	0	0	3	1	0	0	0	3	1	0	0	0	0	0	0	0	0	0	0	0	0	0	0	0	1
28875	5	0	0	1	0	0	0	0	0	0	0	0	0	0	0	0	0	0	0	0	0	0	0	0	0	0	3	0	0	0	0	3	0	0	0	0	0	0	0	0	0	0	0	0	0	5	1	0	5
28876	5	0	0	1	0	0	0	0	0	0	0	0	0	0	0	0	1	0	0	0	0	1	0	0	0	0	1	0	0	0	0	1	0	0	0	0	0	0	0	0	0	0	0	0	0	0	1	0	1
28877	5	0	0	1	0	0	0	0	0	0	0	0	0	0	0	0	1	0	0	0	0	1	0	0	0	0	1	0	0	0	0	1	0	0	0	0	0	0	0	0	0	0	0	0	0	0	0	0	3
28878	5	0	0	1	0	0	0	0	0	0	0	0	0	0	0	0	1	0	0	0	0	1	0	0	0	0	1	0	0	0	0	1	0	0	0	0	0	0	0	0	0	0	0	0	0	5	0	0	5
28879	5	0	0	1	0	0	0	0	0	0	0	0	0	0	0	5	3	0	0	0	5	3	0	0	0	0	1	0	0	0	0	1	0	0	0	0	0	0	0	0	0	0	0	0	0	0	1	0	1
38395	5	0	0	1	0	0	0	0	0	0	0	0	0	0	0	0	0	0	0	0	0	0	0	0	0	0	0	0	0	0	3	0	0	0	0	0	0	0	0	0	0	0	0	0	0	0	1	0	0
38396	5	0	0	1	0	3	0	0	0	0	0	0	0	0	0	5	0	0	0	0	5	0	0	0	0	0	0	0	0	0	0	0	0	0	0	0	0	0	0	0	0	0	0	0	0	0	0	0	1
27830	5	0	0	1	0	0	0	0	0	0	0	0	0	0	0	0	1	0	0	0	0	3	0	0	0	0	3	0	0	0	0	3	1	0	0	0	0	0	1	0	0	0	0	0	0	0	0	0	0
52171	0	0	0	1	0	0	0	0	0	0	0	0	0	0	0	0	1	0	0	0	0	1	0	0	0	0	5	0	0	0	0	5	0	0	0	0	0	0	0	1	0	0	0	0	1	0	0	0	0
28890	5	0	0	1	0	0	0	0	0	0	0	0	0	0	0	0	1	0	0	0	0	1	0	0	0	0	1	0	0	0	0	1	0	0	0	0	0	0	0	0	0	0	0	0	0	0	1	0	1
28891	0	0	0	3	0	0	0	0	0	0	0	0	0	0	0	0	3	0	0	0	0	3	0	0	0	0	3	0	0	0	0	3	0	0	0	0	0	0	0	0	0	0	0	0	0	0	0	0	0
28892	0	0	0	0	0	0	0	0	0	0	0	0	0	0	0	0	5	1	0	0	0	5	0	0	0	0	1	1	0	0	0	1	1	0	0	0	0	0	0	0	0	0	0	0	0	0	0	0	0
28893	5	0	0	1	0	0	0	0	0	0	0	0	0	0	0	0	3	0	0	0	0	3	0	0	0	0	1	0	0	0	0	1	0	0	0	0	1	0	1	0	0	1	0	1	0	0	1	0	1
28894	0	0	0	3	0	0	0	0	0	0	0	0	0	0	0	0	1	0	0	0	0	1	0	0	0	0	1	0	0	0	0	1	0	0	0	0	0	0	0	0	0	0	0	0	0	0	0	0	0
28895	0	0	0	1	0	0	0	0	0	0	0	0	0	0	0	0	1	0	0	0	0	1	0	0	0	0	1	0	0	0	0	1	0	0	0	0	0	0	0	0	0	0	0	0	0	0	0	0	0
38423	0	5	0	0	0	0	0	0	0	0	0	0	0	0	0	0	0	0	0	0	0	0	0	0	0	1	1	1	0	0	0	5	1	0	0	0	0	0	0	0	0	0	0	0	0	0	1	0	1
48075	0	0	0	3	0	0	0	0	0	0	0	0	0	0	0	0	1	0	0	0	0	0	0	0	0	0	3	0	0	0	1	3	1	0	0	0	0	0	0	0	0	0	0	0	0	0	0	0	0
48076	0	0	0	3	0	0	0	0	0	0	0	5	0	0	0	0	1	1	0	0	0	1	1	0	0	1	1	1	0	0	0	3	1	0	0	1	0	0	0	0	0	0	0	0	0	0	0	0	0
52065	0	0	0	3	0	0	0	0	0	0	0	0	0	0	0	0	0	0	0	0	0	0	0	0	0	0	3	3	0	0	0	1	0	0	0	0	0	0	0	0	0	0	0	0	0	0	0	0	3
27398	0	0	0	0	0	0	0	0	0	0	0	0	0	0	0	0	1	0	0	0	0	0	0	0	0	0	5	0	0	0	3	0	0	0	0	0	0	0	0	0	0	0	0	0	0	0	0	0	0
52170	5	0	0	1	0	0	0	0	0	0	0	0	0	0	0	0	1	0	0	0	0	1	0	0	0	0	3	0	0	0	0	5	0	0	0	0	0	0	0	0	0	0	0	0	0	0	0	0	0
27390	0	0	0	0	0	0	0	0	0	0	0	0	0	0	0	0	0	0	0	0	0	0	0	0	0	0	0	0	0	0	0	3	0	0	0	0	0	0	0	0	0	0	0	0	0	0	0	0	0
48141	5	0	0	1	0	0	0	0	0	0	0	0	0	0	0	0	1	1	0	0	0	1	1	0	0	0	3	0	0	0	0	3	0	0	0	0	0	0	0	0	0	0	0	0	0	0	0	0	0
35012	0	0	0	0	0	0	0	0	0	0	0	0	0	0	0	0	0	0	0	0	0	0	0	0	0	0	0	0	0	0	0	0	0	0	0	0	0	0	0	0	0	0	0	0	0	0	3	0	0
35021	0	0	0	1	0	0	0	0	0	0	0	0	0	0	0	0	0	1	0	0	0	0	1	0	0	0	0	1	0	0	0	0	0	0	0	0	0	0	0	0	0	0	0	0	0	0	1	0	0
35031	0	5	0	1	3	0	0	0	0	0	0	0	0	0	0	0	1	0	0	0	0	3	3	0	0	1	3	3	0	0	0	1	3	0	0	0	1	0	0	0	0	0	0	0	0	0	3	0	1
45683	0	0	0	0	1	0	0	0	0	0	0	0	0	0	0	0	3	3	0	0	0	0	0	0	0	0	0	0	0	0	0	3	0	0	0	0	0	0	0	0	0	0	0	0	0	0	3	0	0
45684	0	0	0	0	1	0	0	0	0	0	0	0	0	0	0	0	1	1	0	0	0	1	3	0	0	0	0	1	0	0	0	0	1	0	0	0	0	0	0	0	0	3	0	0	0	0	1	0	0
45685	0	0	0	0	1	0	0	0	0	0	0	0	0	0	0	0	0	1	0	0	0	1	1	0	0	0	1	3	0	0	0	1	3	0	0	0	0	0	0	0	0	0	0	0	0	0	3	0	0
45687	0	0	0	1	1	0	0	0	0	0	0	0	0	0	0	0	0	0	0	0	0	1	1	0	0	1	5	1	0	0	0	5	0	0	0	0	0	0	0	0	0	0	0	0	0	0	1	0	0
35032	5	0	0	3	0	0	0	0	0	0	0	0	0	0	0	0	3	0	0	0	0	1	0	0	0	0	1	0	0	0	0	0	0	0	0	0	0	0	0	0	0	0	0	0	0	0	1	0	0
48148	5	0	0	3	0	0	0	0	0	0	0	0	0	0	0	0	1	0	0	0	0	1	0	0	0	0	1	0	0	0	1	3	0	0	0	0	0	0	0	0	0	1	0	0	0	0	0	0	0
48151	5	0	1	3	0	0	0	0	0	1	0	0	0	5	0	0	5	0	0	0	0	3	0	0	0	1	3	0	0	0	1	3	0	0	0	0	0	0	0	0	0	3	0	0	0	1	1	5	0
48152	5	0	0	0	0	0	0	5	0	0	0	0	0	0	0	0	1	0	0	0	0	1	0	0	0	0	3	0	0	0	1	1	0	0	0	0	0	0	0	0	0	3	0	0	0	1	0	0	5
48153	5	0	0	5	0	0	0	0	0	0	0	0	0	0	0	0	1	0	0	0	0	1	0	0	0	1	1	0	0	0	1	1	0	0	0	0	0	0	0	0	0	0	0	0	0	0	0	0	0
48155	5	0	0	1	0	0	0	0	0	0	0	0	0	0	0	0	1	0	0	0	0	1	0	0	0	0	0	0	0	0	0	0	0	0	0	0	0	0	0	0	0	0	0	0	0	0	0	0	0
38505	5	0	0	1	0	0	0	0	0	0	0	0	0	0	0	0	1	0	0	0	0	1	0	0	0	0	1	1	0	0	0	1	0	0	0	0	0	0	0	0	0	0	0	0	0	0	1	0	0
38506	5	0	0	3	0	0	0	0	0	0	0	0	0	0	0	0	1	0	0	0	0	1	0	0	0	0	1	0	0	0	0	1	0	0	0	0	0	0	0	0	0	0	0	0	0	5	0	0	0
38507	5	0	0	3	0	0	0	0	0	0	0	0	0	0	0	0	1	0	0	0	0	1	0	0	0	0	1	0	0	0	1	1	0	0	0	1	0	0	0	0	0	0	0	0	0	0	0	0	1
27731	0	0	0	0	0	0	0	0	0	0	0	0	0	0	0	0	0	0	0	0	0	0	0	0	0	0	1	0	0	0	0	1	0	0	0	1	1	0	3	0	0	1	0	0	0	0	1	0	1
57061	0	0	0	0	0	0	0	0	0	0	0	0	0	0	0	0	0	0	0	0	0	3	0	0	0	0	1	0	0	0	0	3	0	0	0	0	0	0	0	0	0	0	0	0	0	0	0	0	0
57062	0	0	0	0	0	0	0	0	0	0	3	0	0	0	0	1	1	0	0	0	0	3	0	0	0	0	1	0	0	0	0	1	0	0	0	0	0	0	0	0	0	0	0	0	0	0	1	0	1
59007	0	0	0	0	0	0	0	0	0	0	0	0	0	0	0	0	1	0	0	0	0	0	0	0	0	0	5	0	0	0	0	1	0	0	0	0	0	0	0	0	0	0	0	0	0	0	0	0	0
59262	0	0	0	1	0	0	0	0	0	0	0	0	0	0	0	0	0	0	0	0	0	0	0	0	0	0	0	0	0	0	0	1	0	0	0	0	0	0	0	0	0	0	0	0	0	0	0	0	0
59142	5	0	1	1	0	0	0	0	0	0	0	0	0	0	0	0	0	0	0	0	0	0	0	0	0	0	0	0	0	0	0	1	0	0	0	0	0	0	0	0	0	0	0	0	0	0	0	0	0
59263	0	0	0	0	0	0	0	0	0	0	0	0	0	0	0	0	0	0	0	0	0	1	0	0	0	0	1	0	0	0	0	1	0	0	0	0	0	0	0	0	0	0	0	0	0	0	0	0	0
59264	0	0	0	0	0	0	0	0	0	0	0	0	0	0	0	0	1	0	0	0	0	3	0	0	0	0	1	0	0	0	0	1	0	0	0	0	0	0	0	0	0	0	0	0	0	0	0	0	0
59265	0	0	0	0	0	0	0	0	0	0	0	0	0	0	0	0	1	0	0	0	0	1	0	0	0	0	0	0	0	0	0	0	0	0	0	0	0	0	0	0	0	0	0	0	0	0	0	0	0
59266	0	0	0	1	0	0	0	0	0	0	1	0	0	0	0	0	1	0	0	0	0	1	0	0	0	0	0	0	0	0	0	1	0	0	0	0	0	0	0	0	0	0	0	0	0	0	0	0	0
60003	0	0	0	0	0	0	0	0	0	0	0	0	0	0	0	0	0	0	0	0	0	1	0	0	0	0	0	0	0	0	0	0	0	0	0	0	0	0	0	0	0	0	0	0	0	0	0	0	0
59143	5	0	0	0	0	0	0	0	0	0	1	0	0	0	0	0	0	0	0	0	0	3	0	0	0	0	3	0	0	0	0	0	0	0	0	0	0	0	0	0	0	0	0	0	0	0	0	0	1
59144	5	0	1	0	0	0	0	0	0	0	0	5	0	0	0	0	3	0	0	0	0	0	0	0	0	0	0	0	0	0	0	0	0	0	0	0	0	0	1	0	0	0	0	0	0	1	0	0	0
59145	5	0	0	0	0	0	0	0	0	0	0	3	0	0	0	0	0	0	0	0	0	0	0	0	0	0	0	0	0	0	0	0	0	0	0	0	0	0	0	0	1	0	0	0	0	1	1	0	0
59146	5	0	0	0	0	0	0	0	0	0	0	0	0	0	0	0	0	0	0	0	0	3	0	0	0	0	0	0	0	0	0	3	0	0	0	0	0	0	0	0	0	0	0	0	0	0	0	0	0
59147	5	0	0	1	0	0	0	0	0	0	0	0	0	0	0	0	0	0	0	0	0	0	0	0	0	0	0	0	0	0	0	0	0	0	0	0	0	0	0	0	0	0	0	0	0	0	0	0	0
57058	0	0	0	0	0	0	0	0	0	0	0	0	0	0	3	1	1	0	0	0	0	1	0	0	0	0	1	0	0	0	0	1	0	0	0	0	0	0	0	0	0	0	0	0	0	0	0	0	0
57059	0	0	0	1	0	0	0	0	0	0	0	0	0	0	0	0	0	0	0	0	0	1	0	0	0	0	0	0	0	0	0	3	0	0	0	0	0	0	0	0	0	0	0	0	0	0	0	0	0
57073	0	0	0	1	0	0	0	0	0	0	0	0	0	0	0	0	3	0	0	0	0	3	0	0	0	0	1	0	0	0	0	3	0	0	0	0	0	0	0	0	0	0	0	0	0	0	0	0	0
57057	0	0	0	0	0	0	0	0	0	0	5	0	0	0	3	0	1	0	0	0	0	0	0	0	0	0	3	0	0	0	1	3	0	0	0	0	0	0	0	0	0	0	0	1	0	0	0	0	0
60011	0	0	0	1	0	0	0	0	0	0	0	0	0	0	0	0	3	0	0	0	0	0	0	0	0	0	1	0	0	0	0	1	0	0	0	0	0	0	0	0	0	0	0	0	0	0	0	0	0
58186	0	0	0	0	0	0	0	0	0	0	0	0	0	0	0	0	0	0	0	0	0	0	0	0	0	0	1	0	0	0	0	1	0	0	0	0	0	0	0	0	0	0	0	0	0	0	0	0	0
57076	0	0	0	0	0	0	0	0	0	0	1	0	0	0	0	0	1	0	0	0	0	1	0	0	0	0	1	0	0	0	0	1	0	0	0	0	0	0	0	0	0	0	0	0	0	0	0	0	0
57081	0	0	0	0	0	0	0	0	0	0	1	0	0	0	1	0	3	0	0	0	0	1	0	0	0	0	3	0	0	0	0	1	0	0	0	0	0	0	0	0	0	0	0	0	0	0	0	0	0
58188	0	0	0	0	0	0	0	0	0	0	0	0	0	0	0	0	0	0	0	0	0	0	0	0	0	0	0	0	0	0	0	0	0	0	0	0	0	0	0	0	0	0	0	0	0	0	0	0	0
57088	0	5	0	1	0	0	0	0	0	0	0	0	0	0	0	0	3	0	0	0	1	1	0	0	0	1	1	0	0	0	1	3	0	0	0	0	0	0	0	0	0	1	0	0	0	0	0	0	0
57005	0	0	0	0	0	0	0	0	0	0	1	0	0	0	1	0	1	0	0	0	0	0	0	0	0	0	0	0	0	0	0	0	0	0	0	0	0	0	0	0	0	0	0	0	0	0	0	0	0
58051	0	0	0	0	0	0	0	0	0	0	0	0	0	0	1	0	0	0	0	0	1	0	0	0	0	0	1	0	0	0	0	0	0	0	1	0	0	0	0	0	0	0	0	0	0	0	0	0	0
58059	0	0	0	0	0	0	0	0	0	0	0	0	0	0	0	1	0	0	0	0	1	0	0	0	0	0	0	0	0	0	0	0	0	0	0	0	0	0	0	0	0	0	0	0	0	0	0	0	0
60016	0	5	0	0	0	0	0	0	0	0	0	0	0	0	0	0	0	0	0	0	0	3	0	0	0	1	1	0	0	0	0	3	0	0	0	0	0	0	0	0	0	0	0	0	0	0	0	0	0
57229	0	0	0	0	0	0	0	0	0	0	1	0	0	0	0	0	1	0	0	0	0	0	0	0	0	0	1	0	0	0	0	3	0	0	0	0	0	0	0	0	0	0	0	0	0	0	0	0	0
58179	0	0	0	0	0	0	0	0	0	0	0	0	0	0	0	0	0	0	0	0	0	0	0	0	0	0	1	0	0	0	0	1	0	0	0	0	0	0	0	0	0	0	0	0	0	0	0	0	0
57233	0	0	0	0	0	0	0	0	0	0	0	0	0	0	0	0	1	0	0	0	0	3	0	0	0	1	1	0	0	0	0	1	0	0	0	0	0	0	0	0	0	0	0	0	0	0	0	0	0
59127	0	0	0	0	0	0	0	0	0	0	0	0	0	0	0	0	1	0	0	0	0	1	0	0	0	0	1	0	0	0	0	1	0	0	0	0	0	0	0	0	0	0	0	0	0	0	0	0	0
59128	0	0	0	0	0	0	0	0	0	0	0	0	0	0	0	0	1	0	0	0	0	1	0	0	0	0	0	0	0	0	0	0	0	0	0	0	0	0	0	0	0	0	0	0	0	0	0	0	0
59129	0	0	0	0	0	0	0	0	0	0	0	0	0	0	0	0	1	0	0	0	0	1	0	0	0	0	0	0	0	0	0	1	0	0	0	0	0	0	0	0	0	0	0	0	0	0	0	0	0
59130	0	0	0	1	0	0	0	0	0	0	0	0	0	0	0	0	1	0	0	0	0	1	0	0	0	0	0	0	0	0	0	0	0	0	0	0	0	0	0	0	0	0	0	0	0	0	0	0	0
59131	0	0	0	0	0	0	0	0	0	0	0	0	0	0	0	0	3	0	0	0	0	1	0	0	0	0	0	0	0	0	0	1	0	0	0	0	0	0	0	0	0	0	0	0	0	0	0	0	0
59109	0	5	0	1	0	0	0	0	0	0	0	0	0	0	0	0	1	0	0	0	0	1	0	0	0	0	3	0	0	0	0	3	0	0	0	0	0	0	0	0	0	0	0	0	0	0	0	0	0
59110	0	5	0	1	0	0	0	0	0	0	0	0	0	0	0	0	3	0	0	0	0	0	0	0	0	0	3	0	0	0	0	1	0	0	0	0	0	0	0	0	0	0	0	0	0	0	0	0	0
59113	0	5	0	1	0	0	0	0	0	0	0	0	0	0	0	0	1	0	0	0	0	5	0	0	0	0	3	0	0	0	1	3	0	0	0	0	0	0	0	0	0	0	0	0	0	0	0	0	0
59001	0	0	0	1	0	0	0	0	0	0	0	0	0	0	0	0	1	0	0	0	0	3	0	0	0	0	0	0	0	0	0	3	0	0	0	0	0	0	0	0	0	0	0	0	0	0	1	0	0
58023	1	5	1	0	0	0	0	0	0	0	0	0	0	0	0	1	0	0	0	0	1	0	0	0	0	0	1	0	0	0	0	1	0	0	0	0	0	0	0	0	0	0	0	0	0	0	0	0	0
59272	0	0	0	1	0	0	0	0	0	0	0	0	0	0	0	0	1	0	0	0	0	1	0	0	0	0	3	0	0	0	0	3	0	0	0	0	0	0	0	0	0	0	0	0	0	0	0	0	0
57099	0	5	1	3	0	0	0	0	0	0	0	0	0	0	0	1	1	0	0	0	0	1	0	0	0	1	1	0	0	0	1	1	0	0	0	0	0	0	0	0	0	0	0	0	0	0	0	0	0
59275	0	0	0	1	0	0	0	0	0	0	0	0	0	0	0	0	1	0	0	0	0	5	0	0	0	0	3	0	0	0	0	3	0	0	0	0	0	0	0	0	0	0	0	0	0	0	1	0	0
59277	5	0	0	3	0	0	0	0	0	0	0	0	0	0	0	0	0	0	0	0	0	5	0	0	0	0	1	0	0	0	0	5	0	0	0	0	1	0	0	0	0	0	0	0	0	0	0	0	1
59276	5	0	0	0	0	0	0	0	0	0	0	0	0	0	0	0	0	0	0	0	0	0	0	0	0	0	1	0	0	0	0	1	0	0	0	0	0	0	0	0	0	0	0	0	0	0	0	0	0
57022	1	5	0	1	0	0	0	0	0	0	1	0	0	0	1	0	1	0	0	0	0	1	0	0	0	3	3	0	0	0	1	3	0	0	0	0	0	0	0	0	0	0	0	0	0	0	0	0	0
59278	5	0	0	0	0	0	0	0	0	0	0	0	0	0	0	0	0	0	0	0	0	1	0	0	0	0	0	0	0	0	0	0	0	0	0	0	0	0	0	0	0	0	0	0	0	5	0	0	0
57173	0	0	0	1	0	0	0	0	0	0	1	0	0	0	1	0	1	0	0	0	0	0	0	0	0	0	3	0	0	0	0	0	0	0	0	0	0	0	0	0	0	0	0	0	0	0	0	0	0
57174	0	0	0	1	0	0	0	0	0	0	1	0	0	0	1	0	1	0	0	0	0	1	0	0	0	1	1	0	0	0	0	3	0	0	0	0	0	0	0	0	0	0	0	0	0	0	0	0	0
57175	0	0	0	3	0	0	0	0	0	0	0	0	0	0	1	0	1	0	0	0	0	1	0	0	0	0	1	0	0	0	1	3	0	0	0	0	0	0	0	0	0	0	0	0	0	0	0	0	0
57176	0	0	0	0	0	0	0	0	0	0	0	0	0	0	0	0	3	0	0	0	0	1	0	0	0	1	1	0	0	0	0	3	0	0	0	0	0	0	0	0	0	0	0	0	0	0	0	0	0
57031	0	5	0	0	0	0	0	0	0	0	1	0	0	0	1	0	0	0	0	0	0	1	0	0	0	0	3	0	0	0	0	1	0	0	0	0	0	0	0	0	0	0	0	0	0	0	0	0	0
57177	0	0	0	1	0	0	0	0	0	0	0	0	0	0	0	0	3	0	0	0	0	1	0	0	0	0	3	0	0	0	0	1	0	0	0	0	0	0	0	0	0	0	0	0	0	0	0	0	0
57188	5	0	1	3	0	0	0	0	0	3	0	0	3	5	0	0	1	0	0	0	0	3	0	0	0	1	3	0	0	0	0	3	0	0	0	0	0	0	0	0	0	0	0	0	0	0	0	0	0
57189	5	0	0	0	0	0	0	0	0	3	1	0	0	3	1	1	1	0	0	0	0	3	0	0	0	0	1	0	0	0	0	0	0	0	0	0	0	0	0	0	0	0	0	0	0	0	5	0	0
57190	5	0	0	1	0	0	0	0	0	0	1	0	0	0	1	0	1	0	0	0	0	1	0	0	0	1	1	0	0	0	0	1	0	0	0	0	0	0	0	0	0	0	0	0	0	0	0	0	0
57191	5	0	0	1	0	0	0	0	0	0	3	0	0	0	3	0	1	0	0	0	0	1	0	0	0	0	5	0	0	0	0	1	0	0	0	0	0	0	0	0	0	0	0	0	0	0	0	0	0
57192	5	0	0	0	0	0	0	0	0	0	1	0	0	0	1	0	3	0	0	0	0	1	0	0	0	0	1	0	0	0	0	1	0	0	0	0	0	0	0	0	0	0	0	0	0	0	0	0	0
57193	5	0	0	1	0	0	0	0	0	0	0	0	0	0	0	0	1	0	0	0	0	1	0	0	0	0	1	0	0	0	0	1	0	0	0	1	0	0	3	0	0	0	5	0	0	1	0	0	0
57194	5	0	0	0	0	0	0	0	0	0	0	0	0	0	0	0	1	0	0	0	0	1	0	0	0	5	0	0	0	0	0	1	0	0	0	0	0	0	0	0	0	0	0	0	0	5	0	0	5
57195	5	0	0	0	0	0	0	0	0	3	0	0	0	3	0	1	1	0	0	0	0	1	0	0	0	1	1	0	0	0	0	1	0	0	0	0	0	0	0	0	0	0	0	0	0	5	0	0	0
57196	5	0	0	0	0	0	0	0	0	3	3	0	0	3	3	1	1	0	0	0	0	3	0	0	0	1	3	0	0	0	0	3	0	0	0	0	0	0	0	0	0	0	0	0	0	0	0	0	0
57182	0	0	0	0	0	0	0	0	0	0	0	0	0	0	0	0	1	0	0	0	0	1	0	0	0	0	5	0	0	0	0	3	0	0	0	0	0	0	0	0	0	0	0	0	0	0	0	0	0
57052	5	0	0	0	0	0	0	5	1	0	5	0	0	0	0	1	1	0	0	0	1	1	0	0	0	1	1	0	0	0	1	3	0	0	0	0	0	0	0	0	0	0	0	0	0	0	0	0	0
57053	5	0	1	3	0	0	0	0	0	0	3	0	0	0	1	0	3	0	0	0	0	1	0	0	0	0	1	0	0	0	0	0	0	0	0	0	1	0	0	0	0	0	0	0	0	5	0	0	0
57054	5	0	0	0	0	0	0	0	0	0	3	0	0	0	5	0	1	0	0	0	0	1	0	0	0	0	1	0	0	0	0	0	0	0	0	0	0	0	0	0	0	0	0	0	0	0	0	0	0
57055	5	0	0	0	0	0	0	0	0	0	0	0	0	0	0	0	1	0	0	0	0	1	0	0	0	0	0	0	0	0	0	1	0	0	0	0	0	0	0	0	0	0	0	0	0	5	0	0	0
57056	5	0	0	0	0	0	0	0	0	0	0	0	0	0	3	0	0	0	0	0	0	0	0	0	0	0	0	0	0	0	0	0	0	0	0	0	0	0	0	0	0	0	0	0	0	0	0	0	0
58044	5	0	1	0	0	0	0	0	0	0	0	1	0	0	0	1	3	0	0	0	0	1	0	0	0	0	1	0	0	0	0	1	0	0	0	0	3	0	0	0	0	0	0	0	0	0	0	0	0
58045	5	0	0	0	0	0	0	0	0	0	0	0	0	0	0	1	1	0	0	0	1	0	0	0	0	0	0	0	0	1	0	0	0	0	3	0	1	0	0	0	0	1	0	0	0	0	0	0	0
57021	0	0	0	0	0	0	0	0	0	0	0	0	0	0	0	0	3	0	0	0	1	3	0	0	0	0	0	0	0	0	0	0	0	0	0	0	0	0	0	0	0	0	0	0	0	0	0	0	0
57023	0	0	0	0	0	0	0	0	0	0	0	0	0	0	1	0	1	0	0	0	0	1	0	0	0	1	0	0	0	0	0	1	0	0	0	0	0	0	0	0	0	0	0	0	0	0	0	0	0
57024	0	0	0	0	0	0	0	0	0	0	3	0	0	0	1	1	5	0	0	0	0	0	0	0	0	0	0	0	0	0	1	3	0	0	0	0	0	0	0	0	0	0	0	0	0	0	0	0	0
57027	0	0	0	0	0	0	0	0	0	0	1	0	0	0	1	0	3	0	0	0	0	0	0	0	0	0	0	0	0	0	0	3	0	0	0	0	0	0	0	0	0	0	0	0	0	0	0	0	0
57030	0	0	0	0	0	0	0	0	0	0	0	0	0	0	0	0	1	0	0	0	1	1	0	0	0	0	3	0	0	0	0	3	0	0	0	0	0	0	0	0	0	0	0	0	0	0	0	0	0
57051	5	0	0	0	0	0	0	0	1	0	5	0	0	0	0	0	3	0	0	0	0	1	0	0	0	0	1	0	0	0	0	1	0	0	0	0	0	0	0	0	0	0	0	0	0	0	0	0	0
57092	1	1	0	0	0	0	0	0	0	0	1	0	0	0	0	0	1	0	0	0	0	1	0	0	0	1	1	0	0	0	0	5	0	0	0	0	0	0	0	0	0	1	0	0	0	0	0	0	0
57096	5	0	0	0	0	0	0	0	0	0	0	0	0	0	0	0	0	0	0	0	0	0	0	0	0	0	1	0	0	0	0	1	0	0	0	0	0	0	0	0	0	0	0	0	0	0	0	0	0
57184	0	0	0	0	0	0	0	0	0	0	1	0	0	1	1	0	1	0	0	0	0	0	0	0	0	0	3	0	0	0	0	1	0	0	0	0	0	0	0	0	0	1	0	3	0	0	1	0	0
57185	0	0	0	0	0	0	0	0	0	0	1	0	0	0	1	1	1	0	0	0	0	1	0	0	0	1	0	0	0	0	0	1	0	0	0	0	0	0	0	0	0	0	0	0	0	0	0	0	0
59017	0	0	0	0	0	0	0	0	0	0	0	0	0	0	0	0	1	0	0	0	0	1	0	0	0	0	0	0	0	0	0	3	0	0	0	0	0	0	0	0	0	0	0	0	0	0	1	0	0
59024	0	0	0	0	0	0	0	0	0	0	0	0	0	0	0	0	1	0	0	0	0	3	0	0	0	0	0	0	0	0	0	5	0	0	0	0	0	0	0	0	0	0	0	0	0	0	0	0	0
60202	0	0	0	0	0	0	0	0	0	0	0	0	0	0	0	0	0	0	0	0	0	0	0	0	0	0	3	0	0	0	0	1	0	0	0	0	0	0	0	0	0	0	0	0	0	0	0	0	0
59045	0	0	0	1	0	0	0	0	0	0	0	0	0	0	0	0	1	0	0	0	0	3	0	0	0	0	1	0	0	0	0	1	0	0	0	0	0	0	0	0	0	0	0	0	0	0	1	0	0
59049	0	0	0	1	0	0	0	0	0	0	0	0	0	0	0	0	1	0	0	0	0	0	0	0	0	0	3	0	0	0	0	0	0	0	0	0	0	0	0	0	0	0	0	0	0	0	0	0	0
59072	5	0	0	0	0	0	0	0	0	0	0	0	0	0	0	0	3	0	0	0	0	0	0	0	0	0	3	0	0	0	0	1	0	0	0	0	0	0	0	0	0	0	0	0	0	0	0	0	0
59073	5	0	0	0	0	0	0	0	0	0	0	0	0	0	0	0	1	0	0	0	0	3	0	0	0	1	1	0	0	0	0	3	0	0	0	0	0	0	0	0	0	0	0	0	0	0	0	0	0
59074	5	0	0	0	0	0	0	0	0	0	0	0	0	0	0	1	3	0	0	0	0	0	0	0	0	0	5	0	0	0	0	0	0	0	0	0	0	0	0	3	0	0	0	1	3	0	0	0	0
59075	5	0	0	0	0	0	0	0	0	0	0	0	1	0	0	0	3	0	0	0	0	3	0	0	0	0	1	0	0	0	0	3	0	0	0	0	0	0	0	0	0	0	0	0	0	0	0	1	0
59076	5	0	1	0	0	0	0	0	0	0	0	0	0	0	0	0	0	0	0	0	0	0	0	0	0	0	1	0	0	0	0	3	0	0	0	0	0	0	0	0	0	0	0	0	0	1	0	0	0
59077	5	0	0	0	0	0	0	0	0	0	0	0	0	0	0	0	0	1	0	0	0	0	1	0	0	0	0	0	0	0	0	0	0	0	0	0	0	0	0	0	0	0	0	0	0	0	0	0	0
59078	5	0	0	0	0	0	0	0	0	0	0	0	0	0	0	0	3	0	0	0	0	3	0	0	0	0	0	0	0	0	0	0	0	0	0	0	0	0	0	0	0	0	0	0	0	0	0	0	0
59079	5	0	0	0	0	0	0	0	0	0	0	0	0	0	0	0	0	0	0	0	0	0	0	0	0	0	1	0	0	0	1	0	0	0	0	0	0	0	0	0	0	0	0	0	0	0	0	0	0
59080	5	0	0	0	0	0	0	0	0	0	0	0	1	0	0	0	3	0	0	0	0	0	0	0	0	0	1	0	0	0	0	0	0	0	0	0	0	0	0	0	0	0	0	0	0	0	0	0	5
57113	5	0	0	0	0	0	0	0	0	0	3	0	0	0	3	0	3	0	0	0	1	3	0	0	0	0	0	0	0	0	0	0	0	0	0	0	0	0	0	0	0	0	0	0	0	0	0	0	0
57119	0	5	0	0	0	0	0	0	0	0	0	0	0	0	0	0	1	0	0	0	0	1	0	0	0	1	1	0	0	0	0	3	0	0	0	0	0	0	0	0	0	0	0	0	0	0	0	0	0
59306	5	0	0	0	0	0	0	0	0	0	0	0	0	0	0	0	1	0	0	0	0	1	0	0	0	0	0	0	0	0	0	1	0	0	0	0	0	0	0	0	0	3	0	3	0	0	3	0	0
59307	5	0	0	0	0	0	0	0	0	0	0	0	0	0	0	0	0	0	0	0	0	3	0	0	0	0	0	0	0	0	0	3	0	0	0	0	0	0	0	0	0	0	0	0	0	0	0	0	0
59308	5	0	0	0	1	0	0	0	0	0	0	0	0	0	0	0	1	1	0	0	0	1	1	0	0	0	0	0	0	0	0	0	0	0	0	0	0	0	0	0	0	0	0	0	0	0	0	0	0
59309	5	0	0	1	0	0	0	0	0	0	0	0	0	0	0	0	1	0	0	0	0	1	0	0	0	0	0	0	0	0	0	3	0	0	0	0	0	0	0	0	0	0	0	0	0	5	0	0	0
59310	5	0	0	0	0	0	0	0	0	0	0	0	0	0	0	0	0	0	0	0	0	3	0	0	0	0	3	0	0	0	0	0	0	0	0	0	0	0	0	0	0	0	0	0	0	5	0	0	0
59311	5	0	0	1	0	0	0	0	0	0	0	0	0	0	0	0	3	0	0	0	0	1	0	0	0	0	3	0	0	0	0	3	0	0	0	0	0	0	0	0	0	0	0	0	0	0	0	0	0
59312	5	0	0	0	0	0	0	0	0	0	0	0	0	0	0	0	0	0	0	0	0	0	0	0	0	0	0	0	0	0	0	0	0	0	0	0	0	0	0	0	0	0	0	0	0	0	0	0	0
59313	5	0	0	0	0	0	0	0	0	0	0	0	0	0	0	0	0	0	0	0	0	0	0	0	0	0	3	0	0	0	0	0	0	0	0	0	0	0	0	0	0	0	0	0	0	0	0	0	0
59314	5	0	0	1	0	0	0	0	0	0	0	0	0	0	0	0	0	0	0	0	0	0	0	0	0	0	1	0	0	0	0	0	0	0	0	0	0	0	0	0	0	0	0	0	0	5	0	0	0
59315	5	0	0	0	0	0	0	0	0	0	0	0	0	0	0	0	3	0	0	0	0	5	0	0	0	5	0	0	0	0	0	5	0	0	0	0	0	0	0	0	0	0	0	0	0	0	0	0	0
59316	5	0	0	0	1	0	0	0	0	0	0	0	0	0	0	0	1	0	0	0	0	1	0	0	0	0	3	0	0	0	0	1	0	0	0	0	0	0	0	0	0	0	0	0	0	0	0	0	0
59317	5	0	0	0	0	0	0	0	0	0	0	0	0	0	0	0	0	0	0	0	0	0	0	0	0	0	3	0	0	0	0	0	0	0	0	0	0	0	0	0	0	0	0	0	0	0	0	0	0
59318	0	5	0	0	0	0	0	0	0	0	0	0	0	0	0	0	3	0	0	0	0	0	0	0	0	0	3	0	0	0	0	0	0	0	0	0	0	0	0	0	0	0	0	0	0	0	0	0	0
57136	0	5	0	0	0	0	0	0	0	0	1	0	0	0	1	0	1	0	0	0	0	1	0	0	0	0	3	0	0	0	0	5	0	0	0	0	0	0	0	0	0	0	0	0	0	0	0	0	0
60040	0	5	0	0	0	0	0	0	0	0	0	0	0	0	0	0	1	0	0	0	0	1	0	0	0	0	0	0	0	0	0	0	0	0	0	0	0	0	0	0	0	0	0	0	0	0	0	0	0
60041	0	5	0	0	0	0	0	0	0	0	0	0	0	0	0	0	0	0	0	0	0	0	0	0	0	0	1	0	0	0	0	1	0	0	0	0	0	0	0	0	0	0	0	0	0	0	0	0	0
60043	0	5	0	0	0	0	0	0	0	0	0	0	0	0	0	0	1	0	0	0	0	1	0	0	0	0	1	0	0	0	0	1	0	0	0	0	0	0	0	0	0	0	0	0	0	0	0	0	0
60055	0	5	0	0	0	0	0	0	0	0	0	0	0	0	0	0	0	0	0	0	0	0	0	0	0	0	3	0	0	0	0	1	0	0	0	0	0	0	0	0	0	0	0	0	0	0	0	0	0
60271	5	0	0	0	0	0	0	0	0	0	0	0	0	0	0	0	0	0	0	0	0	0	0	0	0	0	3	0	0	0	0	3	0	0	0	0	0	0	0	0	0	0	0	0	0	0	0	0	0
59343	5	0	0	3	3	0	0	0	0	0	0	0	0	0	0	0	1	3	0	0	0	1	3	0	0	1	5	0	0	0	0	3	0	0	0	0	0	0	0	0	0	0	0	0	0	0	1	0	0
59344	5	0	0	1	0	0	0	0	0	0	0	0	0	0	0	0	1	0	0	0	0	1	0	0	0	0	0	0	0	0	0	1	0	0	0	0	0	0	0	0	0	0	0	0	0	0	0	0	0
59355	5	0	0	0	0	0	0	0	0	0	0	0	1	0	0	0	1	0	0	0	0	0	0	0	0	0	0	0	0	0	0	0	0	0	0	0	0	0	0	0	0	0	0	0	0	0	0	0	0
59356	5	0	0	0	0	0	0	0	0	0	0	0	0	0	0	0	5	0	0	0	1	3	0	0	0	0	3	0	0	0	0	0	0	0	0	0	0	0	0	0	0	0	0	0	0	0	0	0	0
59357	5	0	0	0	0	0	0	0	0	0	0	0	0	0	0	0	0	0	0	0	0	1	0	0	0	0	0	0	0	0	0	0	0	0	0	0	0	0	0	0	0	0	0	0	0	5	0	0	0
59358	5	0	0	1	0	0	0	0	0	0	0	5	0	0	0	0	0	0	0	0	0	3	0	0	0	0	0	0	0	0	0	3	0	0	0	5	0	0	0	0	0	0	0	0	0	1	0	0	5
59359	5	0	0	1	0	0	0	0	0	0	0	0	0	0	0	0	5	0	0	0	0	5	0	0	0	0	3	0	0	0	0	3	0	0	0	0	0	0	0	0	0	0	0	0	0	0	0	0	5
59360	5	0	0	0	0	0	0	0	0	0	0	0	0	0	0	0	3	0	0	0	0	5	0	0	0	0	1	0	0	0	0	0	0	0	0	0	0	0	0	0	0	0	0	0	0	0	0	0	0
57123	5	0	0	3	0	0	0	0	0	1	1	0	0	0	1	0	1	0	0	0	0	1	0	0	0	0	0	0	0	0	0	3	0	0	0	0	0	0	0	0	0	0	3	1	0	0	0	0	0
60019	5	0	0	0	0	0	0	0	0	0	0	0	0	0	0	0	1	0	0	0	0	1	0	0	0	0	3	0	0	0	0	0	0	0	0	0	0	0	0	0	0	0	0	0	0	0	0	0	0
60020	5	0	0	0	0	0	0	0	0	0	0	0	0	0	0	0	0	0	0	0	0	0	0	0	0	0	1	0	0	0	0	0	0	0	0	0	0	0	0	0	0	0	0	0	0	0	0	0	0
60021	5	0	0	0	0	0	0	0	0	0	0	0	0	0	0	0	1	0	0	0	0	1	0	0	0	0	3	0	0	0	0	3	0	0	0	0	0	0	0	0	0	0	0	0	0	0	0	0	0
60022	5	0	0	0	0	0	0	0	0	0	0	0	0	0	0	0	1	0	0	0	0	1	0	0	0	0	3	0	0	0	0	0	0	0	0	0	0	0	0	0	0	0	0	0	0	0	0	0	0
60023	5	0	0	0	0	0	0	0	0	0	0	0	0	0	0	0	0	0	0	0	0	0	0	0	0	0	0	0	0	0	0	0	0	0	0	0	0	0	0	0	0	0	0	0	0	0	0	0	0
60024	5	0	0	0	0	0	0	0	0	0	0	0	0	0	0	0	0	0	0	0	0	0	0	0	0	0	0	0	0	0	0	1	0	0	0	0	0	0	0	0	0	0	0	0	0	0	0	0	0
60025	5	0	0	1	0	0	0	0	0	0	0	0	0	0	0	0	0	0	0	0	0	0	0	0	0	0	0	0	0	0	0	0	0	0	0	0	0	0	0	0	0	0	0	0	0	0	0	0	0
60028	5	0	0	0	0	0	0	0	0	0	0	0	0	0	0	0	0	0	0	0	0	0	0	0	0	0	3	0	0	0	0	1	0	0	0	0	0	0	0	0	0	0	0	0	0	5	0	0	0
60027	5	0	0	0	0	0	0	0	0	0	0	0	0	0	0	0	0	0	0	0	0	0	0	0	0	0	1	0	0	0	0	3	0	0	0	0	0	0	0	0	0	0	0	0	0	0	0	0	0
60026	5	0	0	0	0	0	0	0	0	0	0	0	0	0	0	0	1	0	0	0	0	1	0	0	0	0	1	0	0	0	0	0	0	0	0	0	0	0	0	0	0	0	0	0	0	0	0	0	0
60030	5	0	0	0	0	0	0	0	0	0	0	0	0	0	0	0	3	0	0	0	0	3	0	0	0	0	1	0	0	0	0	1	0	0	0	0	0	5	0	0	0	0	5	0	0	0	0	0	0
59361	5	0	0	0	0	0	0	0	0	0	0	0	0	0	0	3	3	0	0	0	0	1	0	0	0	0	1	0	0	0	0	3	0	0	0	0	0	0	0	0	0	0	0	5	0	0	0	0	3
57220	5	0	1	1	0	0	0	0	0	0	1	0	0	0	1	1	1	0	0	0	0	3	0	0	0	0	5	0	0	0	1	1	0	0	0	0	0	0	0	0	0	0	0	0	0	0	0	0	0
57221	5	0	0	0	1	0	0	0	0	0	1	0	0	0	1	0	0	0	0	0	0	3	0	0	0	0	3	0	0	0	0	3	0	0	0	0	0	0	0	0	0	0	0	0	0	0	0	0	0
57222	5	0	0	0	0	0	0	0	0	0	0	0	0	0	0	0	3	0	0	0	0	3	0	0	0	0	1	0	0	0	1	5	0	0	0	0	0	0	3	0	0	0	0	0	0	0	0	0	0
57223	5	0	0	1	0	0	0	0	0	0	1	0	0	0	1	0	3	0	0	0	0	5	0	0	0	1	3	0	0	0	1	1	0	0	0	0	0	3	0	0	0	0	0	1	0	5	0	0	5
57224	5	0	0	0	0	0	0	0	0	0	0	0	0	0	0	5	0	0	0	0	5	0	0	0	0	5	0	0	0	0	5	0	0	0	0	0	0	0	0	0	0	0	0	0	0	5	0	0	0
57225	5	0	0	0	0	0	0	0	0	0	0	0	0	0	1	3	5	0	0	0	3	3	0	0	0	5	0	0	0	0	3	5	0	0	0	0	0	0	0	0	0	0	0	0	0	1	0	0	5
60274	5	0	0	0	0	0	0	0	0	0	0	0	0	3	0	0	3	0	0	0	0	1	0	0	0	0	3	0	0	0	0	3	0	0	0	0	0	0	0	0	0	0	0	0	0	0	0	0	0
60275	5	0	0	1	0	0	0	0	0	0	0	0	0	0	0	0	1	0	0	0	0	1	0	0	0	0	0	0	0	0	0	0	0	0	0	0	0	0	0	0	0	0	0	0	0	0	0	0	0
60276	5	0	0	0	0	0	0	0	0	0	0	0	0	0	0	0	0	0	0	0	0	0	0	0	0	1	0	0	0	0	0	0	0	0	0	0	0	0	0	0	0	0	0	0	0	0	0	0	0
60277	5	0	0	0	0	0	0	0	0	5	0	0	0	0	0	0	1	0	0	0	0	1	0	0	0	0	0	0	0	0	0	0	0	0	0	0	0	0	0	0	0	0	0	0	0	0	0	0	0
60278	5	0	0	0	0	0	0	0	0	0	0	0	0	0	0	0	0	0	0	0	0	0	0	0	0	1	0	0	0	0	0	3	0	0	0	0	0	0	0	0	0	0	0	0	0	0	0	0	0
60279	5	0	0	1	0	0	0	0	0	0	0	0	0	0	0	0	0	0	0	0	0	0	0	0	0	0	0	0	0	0	0	1	0	0	0	0	0	0	0	0	0	0	0	0	0	0	0	0	0
60280	5	0	0	0	0	0	0	0	0	0	0	0	0	0	0	0	0	0	0	0	0	0	0	0	0	0	1	0	0	0	0	1	0	0	0	0	0	0	0	0	0	0	0	0	0	0	0	0	0
60281	5	0	0	0	0	0	0	0	0	0	0	0	0	0	0	0	0	0	0	0	0	0	0	0	0	5	0	0	0	0	0	5	0	0	0	0	0	5	0	0	0	0	0	0	0	0	0	0	0
60282	5	0	0	0	0	0	0	0	0	0	0	0	0	0	0	0	1	0	0	0	0	1	0	0	0	0	0	0	0	0	0	0	0	0	0	0	0	0	0	0	0	0	0	0	0	0	0	0	0
60283	5	0	0	0	0	0	0	0	0	0	0	0	0	0	0	0	1	0	0	0	0	1	0	0	0	0	3	0	0	0	0	1	0	0	0	0	0	0	0	0	0	0	0	0	0	0	0	0	0
58173	5	0	0	0	0	0	0	0	0	0	0	5	0	1	3	0	0	0	0	0	0	0	0	0	0	0	0	0	0	0	0	0	0	0	0	0	0	0	0	0	0	0	0	0	0	0	1	1	0
58161	5	0	0	0	0	0	0	0	0	0	1	0	0	0	0	1	0	0	0	0	1	0	0	0	0	0	0	0	0	0	0	0	0	0	0	0	0	0	0	0	0	0	0	0	0	0	0	0	0
57288	3	5	0	0	0	0	0	0	0	5	0	0	0	5	0	0	1	0	0	0	0	0	1	0	0	0	1	0	0	0	1	3	0	0	0	0	0	0	0	0	0	0	0	0	0	0	0	0	0
60392	5	0	0	0	0	0	0	0	0	0	0	0	0	0	0	0	0	0	0	0	0	0	0	0	0	0	0	0	0	0	0	0	0	0	0	0	0	0	0	0	0	0	0	0	0	0	0	0	0
34814	0	0	0	3	0	0	0	0	0	0	0	0	0	0	0	0	0	0	0	0	0	0	0	0	0	0	0	0	0	0	0	0	0	0	0	1	0	1	0	0	1	0	1	0	0	0	0	0	0
34812	0	0	0	0	0	0	0	0	0	0	0	0	0	0	0	0	0	0	0	0	0	0	0	0	0	0	0	0	0	0	0	0	0	0	0	0	0	0	0	0	0	0	0	0	0	0	0	0	0
36181	0	0	0	0	0	0	0	0	0	0	0	0	0	0	0	0	0	0	0	0	0	0	0	0	0	0	0	0	0	0	0	0	0	0	0	0	0	0	0	0	0	0	0	0	0	0	0	0	0
37733	0	0	0	0	0	0	0	0	0	0	0	0	0	0	0	0	0	0	0	0	0	0	0	0	0	0	0	0	0	0	0	0	0	0	0	0	0	0	0	0	0	0	0	0	0	0	0	0	0
37737	0	0	0	0	0	0	0	0	0	3	0	0	0	0	1	0	0	0	0	0	0	0	0	0	0	0	0	0	0	0	0	0	0	0	0	0	0	0	0	0	0	0	0	0	0	0	0	0	0
23409	0	0	0	0	0	0	0	0	0	0	0	0	1	0	0	0	0	0	0	0	0	0	0	0	0	0	1	0	0	0	0	0	0	0	0	0	0	1	0	0	0	0	0	0	0	0	0	1	0
58274	5	0	1	0	0	0	0	0	0	0	0	0	0	0	0	0	0	0	0	0	0	5	0	0	0	0	0	0	0	0	0	0	0	0	0	0	0	0	0	0	0	0	0	0	0	0	0	0	0
58275	5	0	0	1	0	0	0	0	0	0	0	0	0	0	0	0	0	0	0	0	0	0	0	0	0	0	1	0	0	0	5	0	0	0	0	0	0	0	0	0	0	0	0	0	0	5	0	0	0
60401	5	0	0	1	0	0	0	0	0	0	1	0	0	0	1	0	3	0	0	0	0	3	0	0	0	0	0	0	0	0	0	0	0	0	0	1	0	0	0	1	0	0	0	0	0	0	0	0	1
48548	0	0	0	1	0	0	0	0	0	0	0	0	0	0	0	0	0	0	0	0	0	0	0	0	0	1	0	0	0	0	0	0	0	0	0	0	0	0	1	0	0	0	0	1	0	0	0	0	1
48549	0	0	1	0	0	0	0	0	0	0	0	0	0	0	0	0	0	0	0	0	0	0	0	0	0	0	0	0	0	0	0	0	1	0	0	0	0	0	1	0	0	0	0	1	0	0	0	0	0
60331	5	0	0	0	0	0	0	0	0	0	0	0	0	0	0	0	0	0	0	0	0	0	0	0	0	0	0	0	0	0	0	0	0	0	0	0	0	0	0	0	0	0	0	0	0	0	0	0	0
60332	5	0	0	0	0	0	0	0	0	0	0	0	0	0	0	0	1	0	0	0	0	1	0	0	0	0	1	0	0	0	0	1	0	0	0	0	0	0	0	0	0	0	0	0	0	0	0	1	0
60333	5	0	0	0	0	0	0	0	0	0	0	0	0	0	0	0	1	0	0	0	0	1	0	0	0	0	1	0	0	0	0	3	0	0	0	0	0	0	0	0	0	0	0	0	0	0	0	0	0
60334	5	0	0	0	0	0	0	0	0	0	0	0	0	0	0	0	0	0	0	0	0	0	0	0	0	0	1	0	0	0	0	1	0	0	0	0	0	0	0	0	0	0	3	0	0	0	0	0	0
60335	5	0	0	0	0	0	0	0	0	0	0	0	0	0	0	0	0	0	0	0	0	0	0	0	0	0	1	0	0	0	0	1	0	0	0	0	0	0	0	0	0	0	0	0	0	0	0	0	0
60337	5	0	0	0	0	0	0	0	0	0	0	0	0	0	0	0	0	0	0	0	0	0	0	0	0	0	0	0	0	0	0	1	0	0	0	0	0	0	0	0	0	0	0	0	0	0	0	0	0
60338	5	0	0	0	0	0	0	0	0	0	0	0	0	0	0	0	1	0	0	0	0	1	0	0	0	0	0	0	0	0	0	1	0	0	0	0	0	0	0	0	0	0	0	0	0	0	0	0	0
60339	5	0	0	1	0	0	0	0	0	0	0	0	0	0	0	0	0	0	0	0	0	0	0	0	0	0	0	0	0	0	0	0	0	0	0	0	0	0	0	0	0	0	0	0	0	0	0	0	0
60340	5	0	0	0	0	0	0	0	0	0	0	0	0	0	0	0	1	0	0	0	0	1	0	0	0	0	0	0	0	0	0	0	0	0	0	0	0	0	0	0	0	0	0	0	0	0	0	0	0
60341	5	0	0	0	0	0	0	0	0	0	0	0	0	0	0	0	0	0	0	0	0	0	0	0	0	0	0	0	0	0	0	0	0	0	0	0	0	0	0	0	0	0	0	0	0	0	0	0	0
53131	0	0	0	0	1	0	0	0	0	0	0	0	0	0	0	0	0	0	0	0	0	0	0	0	0	0	0	1	0	0	0	0	0	0	0	0	0	0	0	0	0	0	0	0	0	0	0	0	3
53133	0	0	0	1	0	0	0	0	0	0	0	0	0	0	0	0	0	0	0	0	0	0	0	0	0	0	0	0	0	0	0	0	0	0	0	0	0	0	0	0	0	0	0	0	0	0	1	0	3
60229	0	0	0	0	0	0	0	0	0	0	0	0	0	0	0	0	0	0	0	0	0	0	0	0	0	0	1	0	0	0	0	0	0	0	0	0	0	0	0	0	0	0	0	0	0	0	0	0	0
37641	0	0	0	0	0	0	0	0	0	0	0	0	0	0	0	0	0	0	0	0	0	0	0	0	0	0	0	0	0	0	0	0	0	0	0	0	0	0	0	0	0	0	0	0	0	0	0	0	0
48547	0	0	0	0	0	0	0	0	0	0	0	0	0	0	0	0	0	0	0	0	0	0	0	0	0	0	0	0	0	0	0	0	0	0	0	0	0	0	1	0	0	0	0	1	0	0	0	0	0
48550	0	0	0	1	0	0	0	0	0	0	0	0	0	0	0	0	0	0	0	0	0	0	0	0	0	1	0	0	0	0	1	0	0	1	0	0	0	0	1	0	0	0	0	0	0	0	1	0	1
48546	0	0	1	3	0	0	0	0	0	0	0	0	0	0	0	0	0	0	0	0	0	0	0	0	0	1	1	0	0	0	0	0	0	0	0	0	0	0	1	0	0	0	0	1	0	0	0	0	1
60336	5	0	0	0	0	0	0	0	0	0	0	0	0	0	0	0	0	0	0	0	0	3	0	0	0	0	1	0	0	0	0	5	0	0	0	0	0	0	0	0	0	0	0	0	0	0	0	0	0
60342	5	0	0	0	0	0	0	0	0	0	0	0	0	0	0	0	1	0	0	0	0	1	0	0	0	0	1	0	0	0	0	1	0	0	0	0	0	0	0	0	0	0	0	0	0	0	0	0	0
60343	5	0	0	0	0	0	0	0	0	0	0	0	0	0	0	0	1	0	0	0	0	1	0	0	0	0	0	0	0	0	0	1	0	0	0	0	0	0	0	0	0	0	0	0	0	0	0	0	0
60344	5	0	0	5	0	0	0	0	0	0	0	0	0	3	0	0	1	0	0	0	0	0	0	0	0	0	1	0	0	0	0	0	0	0	0	0	0	0	0	0	0	0	0	0	0	0	0	0	0
60345	5	0	0	1	0	0	0	0	0	0	0	0	0	0	0	0	0	0	0	0	0	0	0	0	0	0	0	0	0	0	0	1	0	0	0	0	0	0	0	0	0	0	0	0	0	0	0	0	0
23385	0	0	0	0	0	0	0	0	0	0	0	0	0	0	0	0	0	0	0	0	0	1	0	0	0	0	0	0	0	0	0	0	0	0	0	0	0	0	0	0	0	0	0	0	0	0	0	0	0
60346	5	0	0	1	0	0	0	0	0	0	0	5	0	0	0	0	1	0	0	0	0	1	0	0	0	0	3	0	0	0	0	1	0	0	0	0	0	0	0	0	0	0	0	0	0	0	0	0	0
60347	5	0	0	0	0	0	0	0	0	0	0	0	0	0	0	0	0	0	0	0	0	0	0	0	0	0	1	0	0	0	0	3	0	0	0	0	0	0	0	0	0	0	0	0	0	0	0	0	0
60348	5	0	0	0	0	0	0	0	0	0	0	0	0	1	0	0	1	0	0	0	0	1	0	0	0	0	0	0	0	0	0	0	0	0	0	0	0	0	0	0	0	0	0	0	0	0	0	0	0
60349	5	0	0	1	0	0	0	0	0	0	0	0	0	0	0	0	3	0	0	0	0	0	0	0	0	0	3	0	0	0	0	3	0	0	0	0	0	0	0	0	0	0	0	0	0	0	0	0	0
60350	5	0	0	1	0	0	0	0	0	0	0	0	0	0	0	0	3	0	0	0	0	0	0	0	0	0	3	0	0	0	0	3	0	0	0	0	0	0	0	0	0	0	0	0	0	0	0	0	0
60233	0	0	0	0	0	0	0	0	0	0	0	0	0	0	0	0	0	0	0	0	0	0	0	0	0	0	1	0	0	0	0	3	0	0	0	0	0	0	0	0	0	0	0	0	0	0	0	0	0
60237	0	0	0	0	0	0	0	0	0	0	0	0	0	0	0	0	0	0	0	0	0	0	0	0	0	0	1	0	0	0	0	3	0	0	0	0	0	0	0	0	0	0	0	0	0	0	0	0	0
56057	5	0	0	0	3	0	0	0	0	1	0	0	0	1	0	0	0	0	0	0	0	0	0	0	0	0	0	0	0	0	0	0	0	0	0	0	0	0	1	0	0	0	0	1	0	0	0	3	0
60351	5	0	0	0	0	0	0	0	0	0	0	1	0	5	0	0	0	0	0	0	0	0	0	0	0	0	1	0	0	0	0	1	0	0	0	0	0	0	0	0	0	0	0	0	0	0	0	0	0
60352	5	0	0	0	0	0	0	0	0	0	0	0	0	0	0	0	0	0	0	0	0	0	0	0	0	0	0	0	0	0	0	3	0	0	0	0	0	0	0	0	0	0	0	0	0	0	0	0	0
60353	5	0	0	0	0	0	0	0	0	0	0	0	0	0	0	0	3	0	0	0	0	3	0	0	0	0	0	0	0	0	0	1	0	0	0	0	0	0	0	0	0	0	0	0	0	0	0	0	0
60354	5	0	0	0	0	0	0	0	0	0	0	0	0	0	0	0	0	0	0	0	0	0	0	0	0	0	0	0	0	0	0	0	0	0	0	0	0	0	0	0	0	0	0	0	0	5	0	0	0
60355	5	0	0	0	0	0	0	0	0	0	0	0	0	0	0	0	1	0	0	0	0	0	0	0	0	0	1	0	0	0	0	3	0	0	0	0	0	0	0	0	0	0	0	0	0	5	0	0	0
56054	5	0	0	0	0	0	0	0	0	1	0	0	0	1	0	0	0	0	0	0	0	0	0	0	0	0	0	0	0	0	0	0	3	0	0	0	0	0	1	0	0	0	0	1	0	0	1	0	0
53140	0	0	0	0	3	0	0	0	0	0	0	0	0	0	0	0	0	0	0	0	0	0	0	0	0	0	0	0	0	0	0	0	0	0	0	0	0	0	0	0	0	0	0	0	0	0	0	0	1
60244	0	0	0	0	0	0	0	0	0	0	0	0	0	0	0	0	0	0	0	0	0	0	0	0	0	0	0	0	0	0	0	0	0	0	0	0	0	0	0	0	0	0	0	0	0	0	0	0	0
60245	0	0	0	0	0	0	0	0	0	0	0	0	0	0	0	0	1	0	0	0	0	0	0	0	0	0	3	0	0	0	0	1	0	0	0	0	0	0	0	0	0	0	0	0	0	0	0	0	0
60249	0	0	0	1	0	0	0	0	0	0	0	0	0	0	0	0	0	0	0	0	0	0	0	0	0	0	1	0	0	0	0	3	0	0	0	0	0	0	0	0	0	0	0	0	0	0	0	0	0
60250	0	0	0	0	0	0	0	0	0	0	0	0	0	0	0	0	3	0	0	0	0	1	0	0	0	0	1	0	0	0	0	0	0	0	0	0	0	0	0	0	0	0	0	0	0	0	0	0	0
60251	0	0	0	0	0	0	0	0	0	0	0	0	0	0	0	0	0	0	0	0	0	1	0	0	0	0	0	0	0	0	0	1	0	0	0	0	0	0	0	0	0	0	0	0	0	0	0	0	0
60252	0	0	0	0	0	0	0	0	0	0	0	0	0	0	0	0	0	0	0	0	0	1	0	0	0	0	0	0	0	0	0	1	0	0	0	0	0	0	0	0	0	0	0	0	0	0	0	0	0
60253	0	0	0	0	0	0	0	0	0	0	0	0	0	0	0	0	1	0	0	0	0	0	0	0	0	0	1	0	0	0	0	1	0	0	0	0	0	0	0	0	0	0	0	0	0	0	0	0	0
15689	5	0	0	3	0	5	0	5	0	0	0	0	0	0	0	0	3	0	0	5	0	3	0	0	5	1	3	0	5	0	0	1	0	5	0	0	0	0	0	0	0	0	0	0	0	0	0	0	0
15690	5	0	0	3	0	5	0	0	0	0	0	0	0	0	0	0	1	0	0	5	0	1	0	0	5	1	5	0	5	0	1	3	0	5	0	0	0	0	0	5	0	0	0	0	1	0	0	0	0
60356	5	0	0	1	0	0	0	0	0	0	0	0	0	0	0	0	3	0	0	0	0	3	0	0	0	0	0	0	0	0	0	1	0	0	0	0	0	0	0	0	0	0	0	0	0	0	0	0	0
60357	5	0	0	3	0	0	0	0	0	0	0	0	0	0	0	0	1	0	0	0	0	1	0	0	0	5	0	0	0	0	0	1	0	0	0	0	0	0	0	0	0	0	0	0	0	0	0	0	0
60358	5	0	0	1	0	0	0	0	0	0	0	0	0	0	0	0	0	0	0	0	0	0	0	0	0	0	3	0	0	0	0	0	0	0	0	0	0	0	0	0	0	0	0	0	0	0	0	0	0
60359	5	0	0	0	0	0	0	0	0	0	0	0	0	0	0	0	0	0	0	0	0	0	0	0	0	0	0	0	0	0	0	0	0	0	0	0	0	0	0	0	0	0	0	0	0	0	0	0	0
60360	5	0	0	0	0	0	0	0	0	0	0	0	0	0	0	0	1	0	0	0	0	1	0	0	0	0	0	0	0	0	0	1	0	0	0	0	0	0	0	0	0	0	0	0	0	0	0	0	0
56205	0	0	1	0	0	0	0	0	0	0	0	0	0	0	0	0	0	0	0	0	0	0	0	0	0	0	0	0	0	0	0	0	0	0	0	0	0	0	1	0	0	0	0	1	0	0	0	0	0
60361	5	0	0	0	0	0	0	0	0	0	0	0	0	0	0	0	1	0	0	0	0	1	0	0	0	0	1	0	0	0	0	1	0	0	0	0	0	0	0	0	0	0	0	0	0	0	0	0	0
60362	5	0	0	0	0	0	0	0	0	0	0	0	0	0	0	0	1	0	0	0	0	1	0	0	0	0	1	0	0	0	0	1	0	0	0	0	0	0	0	0	0	0	0	0	0	0	0	0	0
58222	5	0	0	1	0	0	0	0	0	0	0	0	0	0	0	0	0	0	0	0	0	0	0	0	0	0	1	0	0	0	0	0	0	0	0	0	0	0	0	0	0	0	0	0	0	0	0	0	0
23417	5	0	0	0	0	0	0	0	0	0	0	0	1	0	0	0	0	1	0	0	0	3	0	0	0	0	1	0	0	0	0	1	0	0	0	0	0	0	0	0	0	0	0	0	0	0	0	0	0
23418	5	0	0	1	0	0	0	0	0	0	0	0	0	0	0	0	0	0	0	0	0	0	0	0	0	0	0	0	0	0	0	0	0	0	0	1	0	0	0	0	0	0	3	0	0	0	0	0	0
23419	5	0	0	0	0	0	0	0	0	3	0	5	0	0	0	0	0	0	0	0	0	0	0	0	0	0	0	0	0	0	0	0	0	0	0	0	0	0	0	0	0	0	0	0	0	0	0	0	3
23420	5	0	0	0	0	0	0	0	0	0	0	0	0	0	0	0	0	0	0	0	0	0	0	0	0	0	0	0	0	0	0	0	0	0	0	0	0	0	0	0	0	0	0	0	0	0	0	0	0
53152	0	0	0	1	1	0	0	0	0	0	0	0	0	0	0	0	0	0	0	0	0	0	0	0	0	0	0	0	0	0	0	0	0	0	0	0	0	0	0	0	0	0	0	0	0	0	0	0	1
53153	0	0	0	0	0	0	0	0	0	0	0	0	0	0	0	0	0	0	0	0	0	0	0	0	0	0	0	0	0	0	0	0	0	0	0	0	0	0	0	0	0	0	0	0	0	0	0	0	3
36053	5	0	0	0	0	0	0	5	0	0	0	0	0	0	0	0	0	0	0	0	0	0	0	0	0	0	0	0	0	0	0	0	0	0	0	0	0	0	0	0	0	0	0	0	0	0	1	0	0
36054	5	0	0	0	0	0	0	5	0	0	0	0	0	0	0	0	0	0	0	0	0	0	0	0	0	0	0	0	0	0	0	0	0	0	0	0	0	0	0	0	0	0	5	3	0	0	0	0	0
36055	5	0	0	0	0	0	0	0	0	0	0	0	0	0	0	0	0	0	0	0	0	3	0	0	0	0	0	0	0	0	0	0	0	0	0	0	0	0	0	0	0	0	0	0	0	0	0	0	0
23421	5	0	0	0	0	0	0	0	0	0	0	0	1	0	0	0	0	0	0	0	0	5	0	0	0	0	0	0	0	0	0	0	0	0	0	0	0	0	0	0	0	0	0	0	0	0	0	0	0
34895	5	0	0	1	0	0	0	0	0	0	0	3	0	0	0	0	0	0	0	0	0	3	0	0	0	0	0	0	0	0	0	0	0	0	0	3	0	0	0	0	0	0	0	0	0	3	0	0	5
34897	5	0	0	1	0	0	0	0	0	0	0	0	0	0	0	0	1	0	0	0	0	1	0	0	0	0	0	0	0	0	1	0	0	0	0	0	0	0	0	0	0	0	0	0	0	5	0	0	0
34898	5	0	0	0	0	0	0	0	0	0	0	0	0	0	0	0	0	0	0	0	0	0	0	0	0	5	0	0	0	0	5	0	0	0	0	0	0	0	0	0	0	0	0	0	0	5	0	0	0
34865	1	5	0	0	0	0	0	0	0	0	0	0	0	0	0	0	0	0	0	0	0	1	0	0	0	0	0	0	0	0	0	0	0	0	0	0	0	0	0	0	0	1	0	0	0	0	1	0	0
48607	0	0	0	1	0	0	0	0	0	0	0	0	0	0	0	0	0	0	0	0	0	0	0	0	0	1	0	0	1	0	1	0	0	0	0	0	0	0	1	0	0	0	0	0	0	0	0	0	0
34892	0	0	0	0	0	0	0	0	0	0	0	0	0	0	0	0	0	0	0	0	0	0	0	0	0	0	0	0	0	0	0	0	0	0	0	0	0	0	0	0	0	0	0	0	0	0	0	0	0
56173	0	0	0	0	0	0	0	0	0	0	0	0	0	0	0	0	0	0	0	0	0	0	0	0	0	0	0	0	0	0	0	0	0	0	0	0	0	0	3	0	0	0	0	1	0	0	0	0	0
56174	0	0	0	0	0	0	0	0	0	0	0	0	0	0	0	0	0	0	0	0	0	0	0	0	0	0	0	0	0	0	0	0	0	0	0	0	0	0	1	0	0	0	0	1	0	0	0	0	0
53179	5	0	0	5	0	0	0	0	0	0	0	0	0	0	0	0	0	0	0	0	0	0	0	0	0	1	1	0	0	0	1	3	0	0	0	0	0	0	0	0	0	0	0	0	0	5	0	0	0
37806	5	0	0	0	0	0	0	5	0	0	0	5	0	0	0	0	0	0	0	0	0	0	0	0	0	0	0	0	0	0	0	0	0	0	0	0	0	0	0	0	0	0	0	0	0	0	0	0	0
23427	1	0	0	0	1	0	0	0	0	0	0	0	0	0	0	0	0	1	0	0	0	0	0	0	0	0	0	0	0	0	0	0	0	0	0	0	0	0	0	0	0	0	0	0	0	0	0	0	0
53384	0	0	0	1	1	0	0	0	0	0	0	0	0	0	0	0	0	0	0	0	0	0	0	0	0	0	0	0	0	0	0	0	0	0	0	0	0	0	0	0	0	0	0	0	0	0	0	0	0
53386	0	0	0	0	0	0	0	0	0	0	0	0	0	0	0	0	0	0	0	0	0	0	0	0	0	0	0	1	0	0	0	0	0	0	0	0	0	0	0	0	0	0	0	0	0	0	0	0	0
34900	5	0	0	1	0	0	0	0	0	0	0	0	0	0	0	0	0	0	0	0	0	0	0	0	0	0	0	0	0	0	0	0	0	0	0	0	1	0	0	0	0	0	0	0	0	0	0	0	0
34901	5	0	0	3	0	0	0	0	0	0	0	0	0	0	0	0	0	0	0	0	0	0	0	0	0	0	5	0	0	0	0	0	0	0	0	0	0	0	0	0	0	0	0	0	0	0	1	3	0
34902	5	0	0	1	0	0	0	0	0	0	0	0	0	0	0	0	0	0	0	0	0	0	0	0	0	0	0	0	0	0	0	0	0	0	0	0	0	0	0	0	0	0	0	0	0	0	0	1	0
58150	0	0	1	1	0	0	0	0	0	0	1	0	0	0	1	0	0	0	0	0	0	0	0	0	0	0	0	0	0	0	0	0	0	0	0	0	0	0	0	0	0	0	0	0	0	0	0	0	0
23424	5	0	0	0	0	0	0	0	0	0	0	0	0	0	0	0	0	0	0	0	0	0	0	0	0	0	0	0	0	0	0	0	0	0	0	0	0	0	0	0	0	0	1	0	0	0	0	0	0
48387	0	0	0	0	3	0	0	0	0	0	0	0	0	0	0	0	0	0	0	0	0	0	0	0	0	0	0	1	0	0	0	0	1	0	0	0	0	0	0	0	0	0	0	1	0	0	0	0	1
48389	0	0	0	0	0	0	0	0	0	0	0	0	0	0	0	0	0	0	0	0	0	0	0	0	0	0	0	1	0	0	0	0	0	0	0	0	1	0	1	0	0	1	0	1	0	0	1	0	0
48431	5	0	0	0	0	0	0	0	0	5	0	0	0	5	0	0	0	0	0	0	0	0	0	0	0	1	3	0	5	0	3	1	1	5	0	5	0	0	0	0	0	0	0	3	0	3	0	0	0
48432	5	0	5	0	0	5	0	0	0	0	0	0	0	0	0	0	0	0	0	0	0	0	0	0	0	3	3	0	5	0	3	3	1	5	0	0	0	0	0	5	0	0	0	0	5	5	0	0	0
48433	5	0	3	5	0	0	0	0	0	0	0	0	0	0	0	0	0	0	0	0	0	0	0	0	0	5	0	0	0	0	5	0	0	0	0	0	0	0	0	5	0	0	0	0	5	0	0	0	0
48434	5	0	3	5	0	0	0	0	0	0	0	0	0	0	0	0	0	0	0	0	0	0	0	0	0	5	0	0	0	0	5	0	0	0	0	0	0	0	0	5	0	0	0	0	5	5	0	0	0
48435	5	0	3	5	0	3	0	0	0	0	0	0	0	0	0	0	0	0	0	0	0	0	0	0	0	1	1	0	5	0	1	1	0	5	0	5	0	0	0	5	5	0	0	0	5	5	0	0	0
36233	0	0	0	0	0	0	0	0	0	0	0	0	0	0	0	0	0	0	0	0	0	1	0	0	0	0	0	0	0	0	0	1	0	0	0	0	0	0	0	0	0	0	0	0	0	0	1	0	1
36235	0	0	0	0	0	0	0	0	0	0	0	0	0	0	0	0	0	0	0	0	0	0	0	0	0	0	0	0	0	0	0	1	0	0	0	0	0	0	0	0	0	0	0	0	0	0	0	0	0
34908	5	0	0	0	0	0	0	0	5	3	0	0	5	3	0	0	3	0	0	0	0	0	0	0	0	0	1	0	0	0	0	0	0	0	0	0	0	0	0	0	0	0	0	0	0	0	0	0	0
34910	5	0	0	1	0	0	0	0	3	3	0	0	5	5	0	0	0	0	0	0	0	0	0	0	0	0	0	0	0	0	0	0	0	0	0	0	0	0	0	0	0	0	0	0	0	0	0	0	0
34911	5	0	0	0	0	0	0	0	0	0	0	0	0	0	0	0	1	0	0	0	0	1	0	0	0	0	1	5	0	0	0	1	0	0	0	0	0	0	0	0	0	0	0	0	0	0	0	0	0
34912	5	0	0	0	0	0	0	0	0	0	0	0	0	0	0	0	3	0	0	0	0	1	0	0	0	0	0	0	0	0	0	0	0	0	0	1	0	3	0	0	1	0	3	0	0	0	0	0	0
34913	5	0	0	0	0	0	0	0	5	5	0	0	5	3	0	0	0	0	0	0	1	0	0	0	0	0	3	0	0	0	0	3	0	0	0	0	0	0	0	0	0	0	0	0	0	0	0	0	0
34914	0	0	0	0	0	0	0	5	0	0	0	0	0	0	0	0	0	0	0	0	0	0	0	0	0	0	0	0	0	0	0	0	0	0	0	0	0	0	0	0	0	0	0	0	0	3	0	0	5
56185	0	0	0	0	0	0	0	0	0	0	0	0	0	0	0	0	0	0	0	0	0	0	0	0	0	0	0	1	0	0	1	0	0	0	0	0	0	0	1	0	0	0	0	1	0	0	0	0	0
48574	0	0	0	0	0	0	0	0	0	0	0	0	0	0	0	0	0	0	0	0	0	0	0	0	0	0	0	0	0	0	0	0	0	0	0	0	0	0	1	0	0	0	0	1	0	0	0	0	1
48575	0	0	0	0	1	0	0	0	0	0	0	0	0	0	0	0	0	0	0	0	0	0	0	0	0	1	0	0	1	0	0	0	0	1	0	0	0	0	0	0	0	0	0	0	0	0	0	0	1
48391	0	0	0	0	1	0	0	0	0	0	0	0	0	0	0	0	0	0	0	0	0	0	0	0	0	0	0	0	0	0	0	0	0	0	0	0	0	0	0	0	0	0	0	1	0	0	0	0	0
48392	0	0	0	0	0	0	0	0	0	0	0	0	0	0	0	0	0	0	0	0	0	0	0	0	0	1	0	0	0	0	0	0	0	0	0	0	1	0	0	0	0	0	0	0	0	0	0	0	1
48394	0	0	0	0	0	0	0	0	0	0	0	0	0	0	0	0	0	0	0	0	0	0	0	0	0	0	1	1	0	0	0	1	1	0	0	0	0	0	0	0	0	0	0	0	0	0	0	0	0
55333	0	0	0	0	0	0	0	0	0	0	0	0	0	0	0	0	0	0	0	0	0	0	0	0	0	0	1	0	0	0	0	0	0	0	0	0	0	0	0	0	0	0	0	0	0	0	0	0	0
23390	5	0	1	0	1	0	0	0	0	0	0	0	0	0	0	0	0	0	0	0	0	0	0	0	0	0	0	0	0	0	0	1	0	0	0	0	0	0	0	0	0	0	0	0	0	0	0	0	0
48436	5	0	3	5	0	5	0	0	0	0	0	0	0	0	0	0	0	0	0	0	0	0	0	0	0	5	0	0	0	0	5	0	0	0	0	0	0	0	0	5	0	0	0	0	5	5	0	0	0
48437	5	0	3	5	0	5	0	0	0	5	0	0	0	3	0	0	0	0	0	0	0	0	0	0	0	3	3	0	3	0	1	1	0	3	0	0	0	0	0	5	0	0	5	0	5	0	0	3	3
48438	5	0	3	5	0	5	0	0	0	3	0	0	0	3	0	0	0	0	0	0	0	0	0	0	0	3	3	0	5	0	1	1	0	5	0	0	0	0	5	5	5	0	0	0	0	3	0	5	0
56156	0	0	0	0	0	0	0	0	1	0	0	0	1	0	0	0	0	0	0	0	0	0	0	0	0	0	1	1	1	0	0	0	1	1	0	0	1	0	1	0	0	1	0	1	0	0	0	0	0
56068	5	0	0	0	0	0	0	5	0	0	0	5	0	0	0	0	0	0	0	0	0	0	0	0	0	0	0	0	0	0	0	0	0	0	0	3	0	0	0	0	3	0	0	0	0	5	0	0	0
56157	0	0	1	1	0	0	0	0	1	0	0	0	1	0	0	0	0	0	0	0	0	0	0	0	0	0	0	1	0	0	0	0	1	0	0	0	0	0	1	0	0	0	0	0	0	0	0	0	1
48551	0	0	0	1	0	0	0	0	0	0	0	0	0	0	0	0	0	0	0	0	0	0	0	0	0	0	0	1	0	0	1	0	0	0	0	0	0	0	1	0	0	0	0	1	0	0	0	0	1
48552	0	0	1	0	1	0	0	0	0	0	0	0	0	0	0	0	0	0	0	0	0	0	0	0	0	1	0	0	0	0	1	1	1	0	0	0	0	0	1	0	0	0	0	1	0	0	1	0	1
48553	0	0	0	1	1	1	0	0	0	0	0	0	0	0	0	0	0	0	0	0	0	0	0	0	0	1	0	1	0	0	1	0	1	0	0	0	0	0	1	0	0	0	0	1	0	0	0	0	0
48562	5	0	1	3	0	5	0	0	0	5	0	0	0	5	0	0	0	0	0	0	0	0	0	0	0	1	0	3	3	0	1	1	1	5	0	0	1	0	0	3	0	1	0	0	3	0	1	0	3
48559	0	0	1	0	0	1	0	0	0	0	0	0	0	0	0	0	0	0	0	0	0	0	0	0	0	1	0	0	0	0	0	0	1	0	0	0	0	0	0	0	0	0	0	0	0	0	0	0	1
37753	5	0	0	0	0	0	0	0	0	0	0	0	0	0	0	0	0	0	0	0	0	0	0	0	0	0	0	0	0	0	0	0	0	0	0	0	0	0	0	0	0	0	0	0	0	0	0	0	0
37754	5	0	0	0	0	0	0	0	0	0	0	0	0	0	0	0	0	0	0	0	0	0	0	0	0	0	0	0	0	0	0	0	0	0	0	0	0	0	0	0	0	0	0	0	0	0	0	0	0
37755	5	0	0	0	0	0	0	0	0	0	0	0	0	0	0	0	0	0	0	0	0	0	0	0	0	0	0	0	0	0	0	0	0	0	0	0	0	0	0	0	0	0	0	0	0	5	0	0	0
37756	5	0	0	0	0	0	0	0	0	0	0	0	0	0	0	0	0	0	0	0	0	0	0	0	0	0	0	0	0	0	0	5	0	0	0	0	0	0	0	0	0	0	0	0	0	5	0	0	0
16868	0	0	0	0	0	0	0	0	0	0	0	0	0	0	0	0	0	0	0	0	0	0	0	0	0	0	1	0	0	0	0	1	0	0	0	0	0	0	0	0	0	0	0	0	0	0	0	0	0
16869	0	0	0	0	0	0	0	0	0	0	0	0	0	0	0	0	0	0	0	0	0	0	0	0	0	0	1	0	0	0	0	1	0	0	0	0	0	0	0	0	0	0	0	0	0	0	0	0	0
16870	0	0	0	0	0	0	0	0	0	0	0	0	0	0	0	0	0	0	0	0	0	0	0	0	0	0	1	0	0	0	0	1	0	0	0	0	0	0	0	0	0	0	0	0	0	0	0	0	0
16871	0	0	0	0	0	0	0	0	0	0	0	0	0	0	0	0	0	0	0	0	0	0	0	0	0	0	1	0	0	0	0	1	0	0	0	0	0	0	0	0	0	0	0	0	0	0	0	0	0
37757	5	0	0	0	0	0	0	0	0	0	0	0	0	0	0	0	0	0	0	0	0	0	0	0	0	0	0	0	0	0	0	5	0	0	0	0	0	0	0	0	0	0	0	0	0	5	0	0	0
37758	5	0	0	0	0	0	0	5	0	0	0	0	0	0	0	0	0	0	0	0	0	0	0	0	0	0	0	0	0	0	0	0	0	0	0	0	0	0	0	0	0	0	0	0	0	0	0	0	0
36195	5	0	0	0	0	0	0	0	0	0	0	0	0	0	0	0	0	0	0	0	0	0	0	0	0	0	0	0	0	0	0	0	0	0	0	0	0	0	0	0	0	0	0	0	0	0	0	0	1
36196	5	0	0	0	0	0	0	0	0	0	0	0	0	0	0	0	3	1	0	0	0	1	1	0	0	0	0	0	0	0	0	0	0	0	0	0	1	0	0	0	0	0	0	0	0	0	0	0	0
48439	0	0	0	0	1	0	0	0	0	0	0	0	0	0	0	0	0	0	0	0	0	0	0	0	0	0	0	0	0	0	0	0	1	0	0	0	0	0	0	0	0	0	0	0	0	0	0	0	0
56166	5	0	1	1	0	0	0	0	0	0	0	0	0	0	0	0	0	0	0	0	0	0	0	0	0	0	0	1	0	0	0	0	1	0	0	0	1	1	0	0	0	0	0	0	0	0	0	3	0
56167	5	0	1	1	0	0	0	0	0	0	0	0	0	0	0	0	0	0	0	0	0	0	0	0	0	0	0	1	0	0	0	0	1	0	0	0	1	1	0	0	0	0	0	0	0	0	0	3	0
56168	5	0	0	0	1	0	0	0	0	0	0	0	0	0	0	0	0	0	0	0	0	0	0	0	0	0	1	1	0	0	0	1	0	0	0	0	0	0	1	0	0	0	0	0	0	0	0	0	0
56169	5	0	0	0	1	0	0	0	0	0	0	0	0	0	0	0	0	0	0	0	0	0	0	0	0	0	0	0	0	0	0	0	0	0	0	0	0	0	1	0	0	0	0	1	0	0	0	0	0
36226	0	0	0	0	0	0	0	0	0	0	0	0	0	0	0	0	0	0	0	0	0	1	0	0	0	0	0	0	0	0	0	1	0	0	0	0	0	0	0	0	0	0	0	0	0	0	1	0	1
48440	0	0	0	0	1	0	0	0	1	0	0	0	1	0	0	0	0	0	0	0	0	0	0	0	0	0	0	1	0	0	0	0	1	0	0	0	1	0	1	0	0	0	0	0	0	0	1	0	1
48441	0	0	0	0	0	0	0	0	0	0	0	0	0	0	0	0	0	0	0	0	0	0	0	0	0	0	0	1	0	0	0	0	0	1	0	0	0	0	0	0	0	0	0	0	0	0	1	0	0
53282	0	0	1	3	1	0	0	0	0	0	0	0	0	0	0	0	0	0	0	0	0	0	0	0	0	0	0	0	0	0	0	0	1	0	0	0	0	0	0	0	0	0	0	0	0	0	0	0	1
53283	0	0	0	1	0	0	0	0	0	0	0	0	0	0	0	0	0	0	0	0	0	0	0	0	0	0	0	0	0	0	0	0	0	0	0	0	0	0	0	0	0	0	0	0	0	0	0	0	0
53329	0	0	0	1	0	0	0	0	0	0	0	0	0	0	0	0	0	0	0	0	0	0	0	0	0	0	0	0	0	0	0	0	0	0	0	0	0	0	0	0	0	0	0	0	0	0	0	0	1
53333	0	0	0	0	1	0	0	0	0	0	0	0	0	0	0	0	0	0	0	0	0	0	0	0	0	0	0	0	0	0	0	0	0	0	0	0	0	0	0	0	0	0	0	0	0	0	0	0	3
37773	0	0	0	0	0	0	0	0	0	0	0	0	0	0	0	0	0	0	0	0	0	0	0	0	0	0	0	0	0	0	0	0	0	0	0	0	0	0	0	0	0	0	0	0	0	0	0	0	0
53345	5	0	0	0	0	0	0	0	0	0	0	0	0	0	0	0	0	0	0	0	0	0	0	0	0	0	0	3	0	0	0	0	0	0	0	0	0	0	0	0	0	0	0	0	0	0	0	1	3
36197	5	0	0	0	0	0	0	0	0	0	0	0	0	0	0	0	0	0	0	0	0	0	0	0	0	0	0	0	0	0	0	0	0	0	0	0	0	0	0	0	0	0	0	0	0	0	0	0	0
36198	5	0	0	0	0	0	0	5	0	0	0	0	0	0	0	0	0	0	0	0	0	0	0	0	0	5	0	0	0	0	0	0	0	0	0	0	0	0	0	0	1	0	0	0	0	0	1	0	0
36199	5	0	0	0	0	0	0	5	0	0	0	0	0	0	0	0	0	0	0	0	0	0	0	0	0	0	0	0	0	0	0	0	0	0	0	0	0	0	0	0	0	0	0	0	0	0	0	0	1
36200	5	0	0	3	0	0	0	0	0	0	0	0	0	0	0	0	0	0	0	0	0	0	0	0	0	0	0	0	0	0	0	0	0	0	0	0	0	0	0	0	0	0	3	0	0	0	0	0	1
53346	5	0	0	0	1	0	0	0	0	0	0	0	0	0	0	0	0	0	0	0	0	0	0	0	0	0	0	5	0	0	0	0	5	0	0	0	0	0	0	0	0	0	0	0	0	0	1	0	1
55266	5	0	0	0	0	0	0	0	0	0	0	0	0	0	0	0	0	0	0	0	0	0	0	0	0	3	0	0	0	0	3	0	0	0	0	0	0	0	0	0	0	0	0	0	0	5	0	0	0
55267	0	0	0	0	0	0	0	0	0	0	0	0	0	0	0	0	0	0	0	0	0	0	0	0	0	0	0	0	0	0	0	0	0	0	0	0	0	0	0	0	0	0	0	0	0	0	0	0	0
36201	5	0	0	0	0	0	0	0	0	0	0	0	0	0	0	0	0	0	0	0	0	0	0	0	0	0	3	0	0	0	0	0	0	0	0	0	0	0	0	0	0	0	0	0	0	0	0	0	0
36202	5	0	0	0	0	0	0	0	0	0	0	0	0	0	0	0	0	0	0	0	0	0	0	0	0	0	0	0	0	0	0	0	0	0	0	0	0	0	0	0	0	0	0	0	0	0	0	0	1
36203	5	0	0	0	0	0	0	0	0	0	0	0	0	0	0	0	0	0	0	0	0	0	0	0	0	0	0	0	0	0	0	0	0	0	0	0	0	0	0	0	0	0	0	0	0	0	0	0	1
36204	5	0	0	0	0	0	0	0	0	0	0	0	0	0	0	0	0	0	0	0	0	0	0	0	0	5	0	0	0	0	5	0	0	0	0	0	0	0	0	0	0	0	0	0	0	5	0	0	1
36206	5	0	0	0	0	0	0	0	0	0	0	0	0	0	0	0	0	0	0	0	0	0	0	0	0	0	0	0	0	0	1	0	0	0	0	0	0	0	0	0	0	0	0	0	0	5	0	0	1
55276	0	0	0	0	0	0	0	0	0	0	0	0	0	0	0	0	0	0	0	0	0	0	0	0	0	0	0	0	0	0	0	0	0	0	0	0	0	0	0	0	0	0	0	0	0	0	0	0	0
34745	5	0	0	0	0	0	0	0	0	0	0	0	0	0	0	0	1	1	0	0	0	3	3	0	0	0	0	0	0	0	0	0	0	0	0	0	0	1	0	0	0	0	1	0	0	0	1	0	0
37804	5	0	0	0	0	0	0	0	0	0	0	0	0	0	0	0	0	0	0	0	0	0	0	0	0	0	0	0	0	0	0	0	0	0	0	0	0	1	0	0	1	0	1	0	0	0	0	0	0
23429	0	0	0	3	0	0	0	0	1	0	0	0	1	0	0	0	0	0	0	0	0	0	0	0	0	0	0	0	0	0	0	0	0	0	0	0	0	0	0	0	0	0	0	0	0	0	1	0	1
36222	5	0	0	0	0	0	0	0	0	0	0	0	0	0	0	0	0	0	0	0	0	0	0	0	0	0	0	0	0	0	0	0	0	0	0	0	0	3	1	0	0	0	0	0	0	0	0	0	0
23291	5	0	0	3	0	0	0	0	0	0	0	0	0	0	0	0	0	0	0	0	0	0	0	0	0	0	0	0	0	0	0	0	0	0	0	0	0	0	0	0	0	0	0	0	0	0	0	0	0
23292	5	0	0	1	0	0	0	0	0	0	0	0	0	0	0	0	0	0	0	0	0	0	0	0	0	0	0	0	0	0	0	0	0	0	0	0	0	0	0	0	0	0	0	0	0	0	0	0	0
23289	5	0	0	0	0	0	0	0	0	0	0	0	0	0	0	0	0	0	0	0	0	0	0	0	0	0	0	0	0	0	0	0	0	0	0	0	0	1	0	0	0	0	1	0	0	0	0	0	0
23290	5	0	0	5	0	0	0	0	0	0	0	0	0	0	0	0	0	0	3	0	0	1	0	3	0	0	1	0	0	0	0	3	0	0	0	0	0	0	0	0	0	0	0	0	0	0	0	0	0
55379	0	0	0	0	0	0	0	0	0	0	0	0	0	0	0	0	0	0	0	0	0	0	0	0	0	3	0	0	0	0	0	0	0	0	0	0	0	0	0	0	0	0	0	0	0	0	0	0	0
55382	0	0	0	1	0	0	0	0	0	0	0	0	0	0	0	0	0	0	0	0	0	0	0	0	0	0	0	0	0	0	0	0	0	0	0	0	0	0	0	0	0	0	0	0	0	0	0	0	0
34836	3	5	0	0	0	0	0	0	0	0	0	0	0	0	0	0	0	0	0	0	0	0	0	0	0	0	0	0	0	0	0	0	0	0	0	0	0	0	0	0	0	0	0	0	0	0	0	0	0
53357	3	5	0	1	0	0	0	0	0	0	0	0	0	0	0	0	0	0	0	0	0	0	0	0	0	0	0	1	0	0	0	0	1	0	0	0	0	0	0	0	0	0	0	0	0	0	0	0	1
55313	5	0	0	0	1	0	0	0	0	0	0	0	0	0	0	0	0	0	0	0	0	0	0	0	0	0	0	0	0	0	0	0	0	0	0	0	0	0	0	0	0	0	0	0	0	0	0	3	0
34833	0	0	0	0	0	0	0	0	0	0	0	0	0	0	0	0	0	0	0	0	0	1	0	0	0	0	0	0	0	0	0	0	0	0	0	0	0	0	0	0	0	0	0	0	0	0	0	0	0
55385	0	0	0	0	1	0	0	0	0	0	0	0	0	0	0	0	0	0	0	0	0	0	0	0	0	0	0	0	0	0	0	0	0	0	0	0	0	0	0	0	0	0	0	0	0	0	0	0	0
56197	5	0	0	0	1	0	0	0	0	0	5	0	0	0	5	0	0	0	0	0	0	0	0	0	0	0	0	0	0	0	0	0	0	0	0	0	1	0	0	0	0	0	0	0	0	0	0	3	5
56198	5	0	0	0	0	5	0	0	0	0	5	0	0	0	5	0	0	0	0	0	0	0	0	0	0	0	0	0	0	0	0	0	0	0	0	0	1	0	1	0	0	0	0	0	0	0	0	5	5
56199	5	0	0	0	0	3	0	0	0	0	5	0	0	0	5	0	0	0	0	0	0	0	0	0	0	0	0	0	0	0	0	0	0	0	0	0	0	5	0	0	0	0	5	0	0	0	1	5	5
56200	5	0	0	0	0	3	0	5	0	0	0	5	0	0	0	0	0	0	0	0	0	0	0	0	0	0	0	0	0	0	0	0	0	0	0	5	0	0	0	0	5	0	0	0	0	5	0	0	0
56201	5	0	0	0	0	5	0	5	0	0	0	5	0	0	0	0	0	0	0	0	0	0	0	0	0	0	0	0	0	0	0	0	0	0	0	0	0	5	0	0	0	0	5	0	0	3	0	5	0
56202	5	0	5	0	0	0	0	5	0	0	0	5	0	0	0	0	0	0	0	0	0	0	0	0	0	0	0	0	0	0	5	0	0	0	0	5	0	0	0	0	5	0	0	0	0	5	0	0	0
56203	5	0	0	0	0	0	0	5	0	0	0	5	0	0	0	0	0	0	0	0	0	0	0	0	0	5	0	0	0	0	5	0	0	0	0	5	0	0	0	0	5	0	0	0	0	5	0	0	0
34862	5	0	0	1	0	0	0	0	0	0	0	0	0	0	0	0	0	0	0	0	0	3	0	0	0	0	0	0	0	0	0	0	0	0	0	0	3	1	0	0	0	0	1	0	0	0	0	0	0
34863	5	0	0	1	0	0	0	0	0	0	0	0	0	0	0	0	0	0	0	0	0	1	0	0	0	0	0	0	0	0	0	0	0	0	0	0	0	0	0	0	0	0	0	0	0	0	0	0	0
34864	5	0	0	0	0	0	0	0	0	0	0	0	0	0	0	0	0	0	0	0	0	0	0	0	0	0	0	0	0	0	0	0	0	0	0	0	0	0	0	0	0	0	0	0	0	0	0	0	0
37779	0	0	0	0	0	0	0	0	0	0	0	0	0	0	0	0	0	0	0	0	0	3	0	0	0	0	0	0	0	0	0	3	0	0	0	0	0	0	0	0	1	0	1	0	0	0	0	0	0
48604	5	0	1	1	0	3	0	0	0	0	0	0	0	0	0	0	0	0	0	0	0	0	0	0	0	1	0	0	3	0	1	1	0	3	0	0	0	0	0	0	0	0	0	0	0	0	0	0	0
55394	0	0	0	0	0	0	0	0	0	0	0	0	0	0	0	0	0	0	0	0	0	0	0	0	0	0	0	0	0	0	0	0	0	0	0	0	0	0	0	0	0	0	0	0	0	0	0	0	0
37780	0	0	0	0	0	0	0	0	0	0	0	0	0	0	0	0	0	0	0	0	0	0	0	0	0	0	0	0	0	0	0	0	0	0	0	0	0	0	0	0	0	0	0	0	0	0	0	0	0
37781	0	0	0	1	0	0	0	0	1	5	0	0	0	1	0	0	0	0	0	0	0	0	0	0	0	0	0	0	0	0	0	0	0	0	0	0	0	0	0	0	0	0	0	0	0	0	0	0	0
37782	0	0	0	0	0	0	0	0	0	0	0	0	0	0	0	0	0	0	0	0	0	0	0	0	0	0	0	0	0	0	0	0	0	0	0	0	0	1	0	0	0	0	0	0	0	0	0	0	0
37783	0	0	0	0	0	0	1	0	0	0	0	0	0	0	0	0	0	0	1	0	0	3	0	1	0	0	0	0	0	0	0	0	0	0	0	0	0	0	0	0	0	0	0	0	0	0	0	0	0
37784	0	0	0	0	0	0	0	0	0	0	0	0	0	0	0	0	0	0	0	0	0	3	0	0	0	0	0	0	0	0	0	0	0	0	0	3	0	1	0	0	0	0	0	0	0	0	0	0	0
55399	0	0	0	0	0	0	0	0	0	0	0	0	0	0	0	0	0	0	0	0	0	0	0	0	0	0	0	0	0	0	0	0	0	0	0	0	0	0	0	0	0	0	0	0	0	0	0	0	0
37788	0	5	0	0	0	0	0	0	0	0	0	0	0	0	0	0	0	0	0	0	0	0	0	0	0	0	0	0	0	0	0	0	0	0	0	0	0	0	0	0	0	0	0	0	0	0	0	0	0
48459	0	0	0	0	0	0	0	0	0	0	0	0	0	0	0	0	0	0	0	0	0	0	0	0	0	0	0	0	0	0	0	0	0	0	0	0	0	0	0	0	0	0	0	0	0	0	0	0	1
48461	0	0	0	0	3	0	0	0	0	1	0	0	0	1	0	0	0	0	0	0	0	0	0	0	0	0	0	1	0	0	0	0	0	0	0	0	1	0	0	0	0	0	0	0	0	0	0	0	1
37649	0	5	0	0	0	0	0	0	0	0	0	0	0	0	0	0	0	0	0	0	0	0	0	0	0	0	0	0	0	0	0	0	0	0	0	0	0	0	0	0	0	0	0	0	0	0	0	0	0
34824	1	0	0	1	0	0	0	0	0	0	0	0	0	0	0	0	0	0	0	0	0	0	0	0	0	0	3	0	0	0	0	0	0	0	0	0	0	0	0	0	0	0	0	0	0	0	0	0	0
37646	0	0	0	0	0	0	0	0	0	0	0	0	0	0	0	0	0	0	0	0	0	0	0	0	0	0	0	0	0	0	0	0	0	0	0	0	0	0	0	0	0	0	0	0	0	0	0	0	0
37647	0	0	0	0	0	0	0	0	0	0	0	0	0	0	0	0	0	0	0	0	0	0	0	0	0	0	0	0	0	0	0	0	0	0	0	0	0	0	0	0	0	0	0	0	0	0	0	0	0
34622	0	0	0	0	0	0	1	0	0	0	0	0	0	0	3	0	0	0	1	0	0	0	0	1	0	0	0	0	0	1	0	3	0	0	1	0	0	0	0	0	0	0	0	0	0	0	0	0	0
34620	0	0	0	0	0	0	0	0	0	0	0	0	0	0	0	0	0	0	0	0	0	3	0	0	0	0	0	0	0	0	0	0	0	0	0	0	0	0	0	0	0	0	0	0	0	0	0	0	0
34887	5	0	0	0	0	0	0	0	0	0	0	0	0	0	0	0	0	0	0	0	0	3	0	0	0	0	0	0	0	0	0	0	0	0	0	0	0	0	0	0	0	0	0	0	0	0	0	0	0
34885	0	0	0	0	0	0	0	0	0	0	0	0	0	0	0	0	0	0	0	0	0	1	0	0	0	0	0	0	0	0	0	3	0	0	0	0	0	0	0	0	0	0	0	0	0	0	0	0	0
34886	0	0	0	0	0	0	0	0	0	0	0	0	0	0	0	0	1	0	0	0	0	0	0	0	0	0	0	0	0	0	0	0	0	0	0	0	0	0	0	0	0	0	0	0	0	0	0	0	0
34883	0	0	0	0	0	0	0	0	0	0	0	0	0	0	0	0	0	0	0	0	0	0	0	0	0	0	0	0	0	0	0	0	0	0	0	0	0	0	0	0	0	0	0	0	0	0	0	1	0
34884	0	0	0	0	0	0	0	0	0	0	0	0	0	0	0	0	0	0	0	0	0	0	0	0	0	0	0	0	0	0	0	0	0	0	0	0	0	0	0	0	0	0	0	0	0	0	0	0	0
34882	0	0	0	0	0	0	0	0	0	0	0	0	0	0	0	0	0	0	0	0	0	0	0	0	0	1	5	0	0	0	0	0	0	0	0	0	0	0	0	0	0	0	0	0	0	0	0	0	0
23515	5	0	0	0	0	0	0	0	5	3	0	0	3	0	0	0	0	0	0	0	0	0	0	0	0	1	0	0	0	0	0	0	0	0	0	0	1	0	0	0	0	0	0	0	0	0	0	0	0
55238	0	0	0	0	0	0	0	0	0	0	0	0	0	0	0	0	0	0	0	0	0	0	0	0	0	0	0	0	0	0	0	0	0	0	0	0	0	0	0	0	0	0	0	0	0	0	0	0	0
55240	0	0	0	0	0	0	0	0	0	0	0	0	0	0	0	0	0	0	0	0	0	0	0	0	0	0	0	0	0	0	0	0	0	0	0	0	0	0	0	0	0	0	0	0	0	0	0	0	0
55241	0	0	0	0	0	0	0	0	0	0	0	0	0	0	0	0	0	0	0	0	0	0	0	0	0	0	0	0	0	0	0	0	0	0	0	0	0	0	0	0	0	0	0	0	0	0	0	0	0
55242	0	0	0	0	0	0	0	0	0	0	0	0	0	0	0	0	0	0	0	0	0	0	0	0	0	0	0	0	0	0	0	0	0	0	0	0	0	0	0	0	0	0	0	0	0	0	0	0	0
55243	0	0	0	0	0	0	0	0	0	0	0	0	0	0	0	0	0	0	0	0	0	0	0	0	0	0	0	0	0	0	0	0	0	0	0	0	0	0	0	0	0	0	0	0	0	0	0	0	0
55244	0	0	0	0	0	0	0	0	0	0	0	0	0	0	0	0	0	0	0	0	0	0	0	0	0	0	0	0	0	0	0	0	0	0	0	0	0	0	0	0	0	0	0	0	0	0	0	0	0
34874	1	0	0	5	0	0	0	0	0	0	0	0	0	0	0	1	0	3	0	0	0	0	0	0	0	0	0	0	0	0	0	0	0	0	0	0	0	0	0	0	0	0	0	0	0	0	0	0	0
53221	0	0	0	0	1	0	0	0	0	0	0	0	0	0	0	0	0	0	0	0	0	0	0	0	0	0	0	0	0	0	0	0	0	0	0	0	0	0	0	0	0	0	0	0	0	0	0	0	0
53227	0	0	0	0	0	0	0	0	0	0	0	0	0	0	0	0	0	0	0	0	0	0	0	0	0	0	1	0	0	0	0	0	0	0	0	0	0	0	0	0	0	0	0	0	0	0	0	0	1
53230	0	0	1	1	0	0	0	0	0	0	0	0	0	0	0	0	0	0	0	0	0	0	0	0	0	0	0	0	0	0	0	0	0	0	0	0	0	0	0	0	0	0	0	0	0	0	0	0	1
36100	5	0	0	0	0	0	0	0	0	0	0	0	0	0	0	0	0	0	0	0	0	0	0	0	0	0	1	0	0	0	0	0	0	0	0	0	0	0	0	0	0	0	0	0	0	0	0	0	1
56091	0	0	0	0	0	0	0	0	0	0	0	0	0	0	0	0	0	0	0	0	0	0	0	0	0	0	0	0	0	0	0	0	0	0	0	0	0	0	0	0	0	0	0	1	0	0	0	0	0
34621	0	0	0	0	0	0	0	0	0	0	0	0	0	0	0	0	0	1	0	0	0	0	1	0	0	0	0	0	0	0	0	0	0	0	0	0	0	0	0	0	0	0	0	0	0	0	0	3	0
34628	0	0	0	0	0	0	0	0	0	0	0	0	0	0	0	0	0	0	0	0	0	0	0	0	0	0	0	0	0	0	0	0	0	0	0	0	0	0	0	0	0	0	0	0	0	0	0	0	0
34629	0	0	0	1	0	0	0	0	0	0	0	0	0	0	0	0	1	0	0	0	0	0	0	0	0	0	0	0	0	0	0	1	0	0	0	0	0	0	0	0	0	0	0	0	0	0	0	0	1
53094	0	0	0	0	0	0	0	0	0	0	0	0	0	0	0	0	0	0	0	0	0	0	0	0	0	1	0	1	0	0	0	0	0	0	0	0	0	0	0	0	0	0	0	0	0	0	0	0	1
53095	0	0	0	1	0	0	0	0	0	0	0	0	0	0	0	0	0	0	0	0	0	0	0	0	0	0	0	1	0	0	0	0	0	0	0	0	0	0	0	0	0	0	0	0	0	0	0	0	0
45696	0	0	0	1	1	0	0	0	0	0	0	0	0	0	0	0	0	0	0	0	0	3	0	0	0	0	1	1	0	0	0	0	1	0	0	0	0	0	0	0	0	0	0	0	0	0	5	0	0
53096	5	0	0	3	0	0	0	0	0	0	0	0	0	0	0	0	0	0	0	0	0	0	0	0	0	0	0	0	0	0	0	0	0	0	0	0	0	0	0	0	0	0	0	0	0	0	0	0	0
53106	0	0	0	0	0	0	0	0	0	0	0	0	0	0	0	0	0	0	0	0	0	0	0	0	0	0	0	0	0	0	0	0	0	0	0	0	0	0	0	0	0	0	0	0	0	0	3	0	1
90037	0	0	0	0	0	0	0	0	0	0	0	0	0	0	0	0	0	0	0	0	0	0	0	0	0	0	0	0	0	0	0	0	0	0	0	0	0	0	0	0	0	0	0	0	0	0	0	0	1
90038	0	0	0	0	0	0	0	0	0	0	0	0	0	0	0	0	3	0	0	0	0	3	0	0	0	0	0	0	0	0	0	0	0	0	0	0	0	0	0	0	0	0	0	0	0	0	0	0	1
90039	0	0	0	0	0	0	0	0	0	0	0	0	0	0	0	0	0	0	0	0	0	0	0	0	0	0	0	0	0	0	0	0	0	0	0	0	0	0	0	0	0	0	0	0	0	0	0	0	1
90040	0	0	0	0	0	0	0	0	0	0	0	0	0	0	0	0	0	0	0	0	0	0	0	0	0	0	0	0	0	0	0	0	0	0	0	0	0	0	0	0	0	0	0	0	0	0	0	0	0
53119	0	0	0	0	0	0	0	0	0	0	0	0	0	0	0	0	0	0	0	0	0	0	0	0	0	0	0	0	0	0	0	0	0	0	0	0	0	0	0	0	0	0	0	0	0	0	0	0	3
90036	0	0	0	0	0	0	0	0	0	0	0	0	0	0	0	0	0	0	0	0	0	0	0	0	0	0	0	0	0	0	0	0	0	0	0	0	0	0	0	0	0	0	0	0	0	0	0	0	0
90041	0	0	0	0	0	0	0	0	0	0	0	0	0	0	0	0	0	0	0	0	0	0	0	0	0	0	0	0	0	0	0	0	0	0	0	0	0	0	0	0	0	0	0	0	0	0	0	0	0
90042	0	0	0	0	0	0	0	0	0	0	0	0	0	0	0	0	0	0	0	0	0	0	0	0	0	0	0	0	0	0	0	0	0	0	0	0	0	0	0	0	0	0	0	0	0	0	0	0	0
55182	0	0	0	0	0	0	0	0	0	0	0	0	0	0	0	0	0	0	0	0	0	0	0	0	0	0	0	0	0	0	0	0	0	0	0	0	0	0	0	0	0	0	0	0	0	0	0	0	0
55170	5	0	0	0	0	0	0	0	0	3	0	0	0	3	0	0	0	0	0	0	0	0	0	0	0	0	1	0	0	0	0	0	0	0	0	0	0	5	0	0	0	0	5	0	0	0	0	5	3
55171	5	0	0	0	0	0	0	0	0	0	0	0	0	0	0	0	0	0	0	0	0	0	0	0	0	0	0	0	0	0	0	0	1	0	0	0	0	3	0	0	0	0	3	0	0	0	0	0	0
55172	5	0	0	0	0	0	0	0	0	0	0	0	0	0	0	0	0	0	0	0	0	0	0	0	0	0	0	0	0	0	0	0	0	0	0	0	0	0	0	0	0	0	0	0	0	0	0	0	0
55173	0	0	0	0	0	0	0	0	0	0	0	0	0	0	0	0	0	0	0	0	0	0	0	0	0	0	0	0	0	0	0	0	0	0	0	0	0	0	0	0	0	0	0	0	0	0	0	0	0
55174	0	0	0	0	0	0	0	0	0	0	0	0	0	0	0	0	0	0	0	0	0	0	0	0	0	0	0	0	0	0	0	0	0	0	0	0	0	0	0	0	0	0	0	0	0	0	0	0	0
55175	0	0	0	0	0	0	0	0	0	0	0	0	0	0	0	0	0	0	0	0	0	0	0	0	0	0	0	0	0	0	0	0	0	0	0	0	0	0	0	0	0	0	0	0	0	0	0	0	0
53124	1	1	0	1	1	1	0	0	0	0	0	0	0	0	0	0	0	0	0	0	0	0	0	0	0	0	0	3	0	0	0	0	3	0	0	0	0	0	0	0	0	0	0	0	0	0	3	0	1
53125	0	0	0	1	0	0	0	0	0	0	0	0	0	0	0	0	0	0	0	0	0	0	0	0	0	0	0	1	0	0	0	0	1	0	0	0	0	0	0	0	0	0	0	0	0	0	0	0	1
56022	3	5	0	0	0	0	0	0	0	0	0	0	0	0	0	0	0	0	0	0	0	0	0	0	0	0	0	0	0	0	0	0	0	0	0	0	0	0	1	0	0	0	0	1	0	0	0	0	0
56023	5	0	0	1	3	0	0	0	0	0	0	0	0	0	0	0	0	0	0	0	0	0	0	0	0	0	0	0	0	0	0	0	5	0	0	0	5	0	0	0	0	5	5	0	0	0	0	5	0
56024	5	0	0	0	3	0	0	0	0	0	0	0	0	0	0	0	0	0	0	0	0	0	0	0	0	0	0	0	0	0	0	0	0	0	0	0	0	0	0	0	0	0	3	0	0	0	0	0	0
56025	5	0	0	0	0	0	0	0	0	0	0	0	0	0	0	0	0	0	0	0	0	0	0	0	0	0	0	0	0	0	0	0	0	0	0	0	0	0	0	0	0	0	0	0	0	0	0	0	0
48383	5	0	0	0	0	0	0	0	5	0	0	0	0	0	0	0	0	0	0	0	0	0	0	0	0	0	1	3	0	0	0	1	0	0	0	0	0	5	0	0	0	0	5	0	0	0	0	0	0
56067	5	0	0	0	0	0	0	0	0	0	0	0	0	0	0	0	0	0	0	0	0	0	0	0	0	0	0	0	0	0	0	0	0	0	0	0	0	0	0	0	0	0	0	0	0	0	0	0	0
49221	0	0	0	0	0	0	0	0	0	0	0	0	0	0	0	0	1	0	0	0	0	1	0	0	0	0	1	0	0	0	0	1	0	0	0	0	0	0	0	0	0	0	0	0	0	0	0	0	0
49223	0	0	0	0	0	0	0	0	0	0	0	0	0	0	0	0	0	0	0	0	0	0	0	0	0	0	1	0	0	0	0	1	0	0	0	0	0	0	1	0	0	0	0	0	0	0	1	0	0
23454	5	0	0	0	0	0	0	0	0	1	0	0	0	0	0	0	0	0	0	0	0	0	0	0	0	0	0	0	0	0	0	0	0	0	0	0	0	0	0	0	0	0	0	0	0	0	0	0	0
23455	5	0	0	0	0	0	0	0	0	0	0	0	0	0	0	0	0	0	0	0	0	0	0	0	0	0	0	0	0	0	0	0	0	0	0	0	0	0	0	0	0	0	0	0	0	0	0	0	0
23457	5	0	0	0	0	0	0	0	0	0	0	0	0	0	0	0	0	0	0	0	0	0	0	0	0	0	0	0	0	0	0	0	0	0	0	0	0	3	0	0	0	0	0	0	0	0	0	3	0
23468	0	0	0	0	0	0	0	0	0	0	0	0	0	0	0	0	0	0	0	0	0	1	0	0	0	0	0	0	0	0	0	0	0	0	0	0	0	0	0	0	0	0	0	0	0	0	0	0	0
34988	0	0	0	0	0	0	0	0	0	0	0	0	0	0	0	0	0	0	0	0	0	0	0	0	0	0	0	0	0	0	0	3	0	0	0	0	0	0	0	0	0	0	0	0	0	0	0	0	0
34632	0	0	0	0	0	0	0	0	0	0	0	0	0	0	0	0	0	0	0	0	0	0	0	0	0	0	0	0	0	0	0	0	0	0	0	0	0	0	0	0	0	0	0	0	0	0	0	0	0
45706	0	0	0	1	0	0	0	0	0	0	0	0	0	0	0	0	0	0	0	0	0	1	0	1	0	0	1	0	0	0	0	3	0	0	0	0	0	0	0	0	0	0	0	0	0	0	1	0	0
45707	0	0	0	3	3	0	0	0	0	0	0	0	0	0	0	0	0	0	0	0	0	1	0	0	0	0	5	3	0	0	0	5	0	0	0	0	0	0	0	0	0	0	0	0	0	0	3	0	0
36007	0	0	0	0	0	0	0	0	0	0	0	0	0	0	0	0	0	0	0	0	0	0	0	0	0	0	0	0	0	0	0	0	0	0	0	0	0	0	0	0	0	0	0	0	0	0	0	0	0
23357	0	0	0	3	0	0	0	0	1	0	0	0	1	0	0	0	0	0	0	0	0	0	0	0	0	0	5	0	0	0	0	0	1	0	0	0	0	0	0	0	0	0	0	0	0	0	0	0	0
34690	0	0	0	0	0	0	0	0	0	0	0	0	0	0	0	0	0	0	0	0	0	0	0	0	0	0	0	0	0	0	0	0	0	0	0	0	0	0	0	0	0	0	0	0	0	0	0	0	0
23306	5	0	0	0	0	0	0	0	0	0	0	0	1	0	0	0	0	0	0	0	0	5	0	0	0	0	0	0	0	0	0	0	0	0	0	0	0	0	0	0	0	0	0	0	0	0	0	1	0
23307	5	0	0	0	0	0	0	0	0	0	0	0	0	0	0	0	0	0	0	0	0	0	0	0	0	0	0	0	0	0	0	3	0	0	0	0	0	0	0	0	0	0	0	0	0	0	0	0	0
23308	5	0	0	0	0	0	0	5	0	0	0	0	0	0	0	0	0	0	0	0	0	0	0	0	0	0	0	0	0	0	0	0	0	0	0	0	0	0	0	0	0	0	0	0	0	5	3	0	0
23309	5	0	0	0	0	0	0	0	1	0	0	0	1	0	0	0	5	1	0	0	0	0	0	0	0	0	0	0	0	0	0	0	0	0	0	0	0	0	0	0	0	0	0	0	0	0	0	0	0
23310	5	0	0	0	0	0	0	0	0	0	0	0	0	0	0	0	0	0	0	0	0	0	0	0	0	0	0	0	0	0	0	0	0	0	0	0	0	0	0	0	0	0	0	0	0	5	0	0	0
23312	5	0	0	0	0	0	0	0	0	0	1	0	0	0	0	0	0	0	0	0	0	0	0	0	0	0	0	0	0	0	0	0	0	0	0	0	0	0	0	0	0	0	0	0	0	5	0	0	0
23313	0	0	0	0	0	0	0	0	0	0	0	0	0	0	0	0	0	3	0	0	0	0	5	0	0	0	0	0	0	0	0	0	0	0	0	0	0	0	0	0	0	0	0	0	0	0	0	0	0
23304	0	0	0	3	0	0	0	0	0	0	0	0	0	0	0	0	1	0	0	0	0	3	0	1	0	0	1	0	1	1	0	0	0	3	0	0	0	0	0	0	0	0	0	0	0	0	0	0	1
23305	5	0	0	0	0	0	0	0	0	0	0	0	0	0	0	0	3	0	0	0	0	3	0	0	0	0	0	0	0	0	0	0	0	0	0	0	0	0	0	0	0	0	0	0	0	0	0	3	0
23302	0	0	0	1	1	0	0	0	0	0	0	0	0	0	0	0	0	0	0	0	0	0	0	0	0	0	0	0	0	0	0	0	0	0	0	0	0	0	0	0	0	0	0	0	0	0	0	0	0
23303	0	0	0	0	0	0	0	0	0	0	0	0	0	0	0	0	0	0	0	0	0	0	0	0	0	0	0	0	0	0	0	0	0	0	0	0	0	0	0	0	0	0	0	0	0	0	0	0	0
23300	0	0	0	0	0	0	0	0	0	0	0	0	0	0	0	0	0	0	0	0	0	1	0	0	0	0	0	0	0	0	0	0	0	0	0	0	0	1	0	0	0	0	1	0	0	0	1	3	0
23301	0	0	0	1	0	0	0	0	0	0	0	0	0	0	0	0	0	0	0	0	0	0	0	0	0	0	3	0	0	0	0	0	0	0	0	0	0	0	0	0	0	0	0	0	0	0	0	0	0
23299	0	0	0	0	0	0	0	0	0	0	0	0	0	0	0	0	0	0	0	0	0	0	0	0	0	0	0	0	0	0	0	0	0	0	0	0	0	0	0	0	0	0	0	0	0	0	0	0	0
36050	5	0	0	0	0	0	0	5	0	0	0	5	0	0	0	0	0	0	0	0	0	0	0	0	0	0	0	0	0	0	3	3	0	0	0	0	0	0	0	0	0	0	0	0	0	0	0	0	0
23269	0	0	0	0	0	0	0	0	0	0	1	0	0	0	0	0	0	0	0	0	0	0	0	0	0	0	0	0	0	0	0	0	0	0	0	0	0	0	0	0	0	0	0	0	0	0	0	0	0
23266	0	0	0	0	0	0	0	0	1	0	0	0	1	0	0	0	1	1	0	0	0	1	1	0	0	0	3	0	0	0	0	0	0	0	0	0	0	0	0	0	0	0	0	0	0	0	0	0	0
37655	0	0	0	1	0	0	0	0	0	1	0	0	0	3	0	0	1	0	0	0	0	0	0	0	0	0	0	0	0	0	0	1	0	0	0	0	0	0	0	0	0	0	0	0	0	0	0	0	0
34641	0	0	0	0	0	0	0	0	0	0	0	0	0	0	0	0	0	0	0	0	0	0	0	0	0	0	0	0	0	0	0	0	0	0	0	0	0	0	0	0	0	0	0	0	0	0	0	0	0
34652	0	0	0	0	0	0	0	0	0	0	0	0	0	0	0	0	3	0	0	0	0	0	0	0	0	0	0	0	0	0	0	0	0	0	0	0	0	0	0	0	0	0	0	0	0	0	0	0	0
34653	0	0	0	5	0	0	0	0	0	0	0	0	0	0	0	0	0	0	0	0	0	0	0	0	0	0	0	0	0	0	0	0	0	0	0	0	0	0	0	0	0	0	0	0	0	0	0	0	0
34654	0	0	0	0	0	0	0	0	0	0	0	0	0	0	0	0	1	0	0	0	0	0	0	0	0	0	0	0	0	0	0	0	0	0	0	0	0	0	0	0	0	0	0	0	0	0	0	0	0
34655	0	0	0	0	0	0	0	0	0	0	0	0	0	0	0	0	1	0	0	0	0	1	0	0	0	0	1	0	0	0	0	0	0	0	0	0	0	0	0	0	0	0	0	0	0	0	0	0	0
34656	0	0	0	0	0	0	0	0	0	0	0	0	0	0	0	0	0	0	0	0	0	0	0	0	0	0	0	0	0	0	0	0	0	0	0	0	0	0	0	0	0	0	0	0	0	0	0	0	0
34657	0	0	0	0	0	0	0	0	0	0	0	0	0	0	0	0	0	0	0	0	0	0	0	0	0	0	0	0	0	0	0	0	0	0	0	0	0	0	0	0	0	0	0	0	0	0	0	3	0
37682	0	0	0	0	0	0	0	0	0	0	0	0	0	0	0	0	5	0	0	0	0	3	0	0	0	0	0	0	0	0	0	5	0	0	0	0	0	0	0	0	0	0	1	0	0	0	0	0	0
37704	0	0	0	0	0	0	0	0	0	0	0	0	0	0	0	0	0	3	0	0	0	0	3	0	0	0	0	0	0	0	0	0	0	0	0	0	0	1	0	0	1	0	1	0	0	0	0	0	0
45709	0	0	0	1	1	0	0	0	0	0	0	0	0	0	0	0	0	1	0	0	0	0	1	0	0	0	1	0	0	0	0	1	1	0	0	0	1	0	0	0	0	1	0	0	0	0	3	0	0
45720	0	0	0	3	0	0	0	0	0	0	0	0	0	0	0	0	3	0	0	0	0	3	1	0	0	0	3	0	0	0	0	1	3	0	0	0	0	0	0	0	0	0	0	0	0	0	1	0	0
35036	5	0	0	1	1	0	0	0	1	0	1	0	1	0	1	0	1	0	0	0	0	1	0	0	0	0	5	1	0	0	0	0	1	0	0	0	0	0	0	0	0	0	0	0	0	0	0	0	1
35037	5	0	0	3	0	0	0	0	0	0	0	0	0	0	0	0	0	0	0	0	0	0	0	0	0	1	1	1	0	0	0	1	0	0	0	0	0	0	0	0	0	0	0	0	0	0	0	0	0
35064	5	0	0	1	0	0	0	0	1	0	0	0	1	0	0	0	0	0	0	0	0	3	1	0	0	0	0	0	0	0	0	0	0	0	0	0	0	0	0	0	0	0	0	0	0	0	0	0	0
35065	5	0	0	0	0	0	0	0	0	0	0	0	0	0	0	0	3	0	0	0	0	0	0	0	0	0	0	0	0	0	0	0	0	0	0	0	0	0	0	0	0	0	0	0	0	5	1	0	1
35051	0	5	0	0	1	0	0	0	0	0	0	0	0	0	0	0	0	0	0	0	0	0	0	0	0	0	0	0	0	0	0	0	0	0	0	0	0	0	0	0	0	0	0	0	0	0	1	0	0
45740	0	5	0	0	0	0	0	0	0	0	0	0	0	0	0	0	0	0	0	0	0	3	0	0	0	1	3	0	0	0	1	3	0	0	0	0	0	0	0	0	0	0	0	0	0	0	1	0	0
35066	0	0	0	0	1	0	0	0	0	0	0	0	0	0	0	1	3	0	0	0	0	0	0	0	0	0	0	0	0	0	0	0	1	0	0	0	0	0	0	0	0	0	0	0	0	5	1	0	1
35067	0	0	0	0	1	0	0	0	0	0	0	0	0	0	0	0	1	1	0	0	0	3	0	0	0	0	0	0	0	0	0	0	0	0	0	0	0	0	0	0	0	0	0	0	0	5	1	0	1
45785	1	5	1	5	1	0	0	0	0	0	0	0	0	0	0	0	3	0	0	0	0	1	1	1	0	0	5	0	0	0	0	5	0	0	0	0	0	0	0	0	0	0	0	0	0	0	3	0	0
27665	5	0	0	1	0	0	0	0	0	0	0	0	0	0	0	0	1	0	0	0	0	3	0	0	0	1	5	1	0	0	0	3	0	0	0	0	0	0	0	0	0	0	0	0	0	0	3	0	0
27671	5	0	0	1	1	0	0	0	0	0	0	0	0	0	0	0	1	1	0	0	0	1	1	0	0	0	3	0	0	0	0	3	0	0	0	0	1	0	0	0	0	1	0	0	0	0	1	0	0
35388	5	0	0	1	0	0	0	0	0	0	0	0	0	0	0	0	1	0	0	0	0	1	1	0	0	0	5	1	0	0	0	5	3	0	0	0	0	0	0	0	0	0	0	0	0	0	3	0	0
16882	0	5	0	1	0	0	0	0	0	0	0	0	0	0	0	0	3	0	0	0	0	0	0	0	0	0	1	0	0	0	0	1	0	0	0	0	0	0	0	0	0	0	0	0	0	0	0	0	0
27519	0	0	0	0	0	0	0	0	0	0	0	0	0	0	0	0	0	0	0	0	0	0	0	0	0	0	0	0	0	0	0	0	0	0	0	0	0	0	0	0	0	0	0	0	0	0	1	0	1
27520	0	0	0	3	0	0	0	0	0	0	0	0	0	0	0	0	0	0	0	0	0	0	0	0	0	0	0	0	0	0	0	0	0	0	0	0	0	0	0	0	0	1	0	0	0	0	0	0	0
27522	0	0	0	0	1	0	0	0	3	0	0	0	0	0	0	0	0	0	0	0	0	0	0	0	0	0	0	0	0	0	0	0	0	0	0	0	0	0	0	0	0	0	0	0	0	0	0	0	0
27523	0	0	0	1	0	0	0	0	0	0	0	0	0	0	0	0	1	1	0	0	0	0	1	0	0	0	0	0	0	0	0	0	1	0	0	0	0	0	0	0	0	0	0	0	0	0	0	0	0
29833	0	5	0	0	0	0	0	0	0	0	0	0	0	0	0	0	0	0	0	0	0	0	0	0	0	0	3	0	0	0	0	0	0	0	0	0	0	0	0	0	0	0	0	0	0	0	0	0	0
27541	0	0	0	0	0	0	0	0	0	0	0	0	0	0	0	0	0	1	0	0	0	3	0	0	0	0	0	0	0	0	0	0	0	0	0	0	0	0	0	0	0	0	0	0	0	0	0	0	0
27543	0	0	0	0	1	0	0	0	0	0	0	0	0	0	0	0	0	0	0	0	0	0	0	0	0	0	0	0	0	0	0	0	1	0	0	0	0	0	0	0	0	0	0	0	0	0	1	0	0
27544	0	0	0	0	0	0	0	0	0	0	0	0	0	0	0	0	3	0	0	0	0	0	0	0	0	0	3	1	0	0	0	0	1	0	0	0	0	0	0	0	0	0	0	0	0	0	0	0	0
29859	0	0	0	0	0	0	0	0	0	0	0	0	0	0	0	0	0	0	0	0	0	0	0	0	0	0	0	1	0	0	0	0	0	0	0	0	0	0	0	0	0	0	0	0	0	0	0	0	0
29867	0	0	0	0	0	0	0	0	0	0	0	0	0	0	0	0	0	0	0	0	0	0	0	0	0	0	0	0	0	0	0	0	0	0	0	0	0	0	0	0	0	0	0	0	0	0	0	0	0
29868	0	0	0	0	0	0	0	0	0	0	0	0	0	0	1	0	0	0	0	0	0	0	0	0	0	0	0	0	0	0	0	0	0	0	0	0	0	0	0	0	0	0	0	0	0	0	0	0	0
29870	0	0	0	0	0	0	0	0	0	0	0	0	0	0	0	0	0	0	0	0	0	0	0	0	0	0	0	0	0	0	0	0	0	0	0	0	0	0	0	0	0	0	0	0	0	0	0	0	0
29871	5	0	0	0	0	0	0	0	0	0	0	0	0	0	0	0	0	0	0	0	0	0	0	0	0	0	0	0	0	0	0	0	0	0	0	0	0	0	5	0	0	0	0	0	0	0	0	0	3
29872	5	0	0	0	0	0	0	0	0	0	0	0	0	0	0	0	0	0	0	0	0	0	0	0	0	0	0	0	0	0	0	0	0	0	0	0	0	0	0	0	0	0	0	0	0	0	0	0	0
29873	5	0	0	0	0	0	0	0	0	0	0	0	0	0	0	0	1	0	0	0	3	0	0	0	0	0	0	0	0	0	0	0	0	0	0	0	0	0	0	0	0	0	0	0	0	0	0	0	0
29874	5	0	0	0	0	0	0	0	0	0	0	0	0	0	0	0	0	0	0	0	0	0	0	0	0	0	0	0	0	0	0	0	0	0	0	0	0	0	0	0	0	0	0	0	0	0	0	0	0
29875	5	0	0	0	0	0	0	0	0	0	0	0	0	0	0	0	0	0	0	0	0	0	0	0	0	0	0	0	0	0	0	0	0	0	0	0	0	0	0	0	0	0	0	0	0	5	0	0	0
29876	5	0	0	3	0	0	0	0	0	0	0	0	0	0	0	0	0	0	0	0	0	0	0	0	0	0	5	0	0	0	0	0	1	0	0	0	0	0	0	0	0	0	0	0	0	0	0	0	0
29877	5	0	0	0	0	0	0	0	0	0	0	0	0	0	0	0	0	0	0	0	0	0	0	0	0	0	0	0	0	0	0	0	0	0	0	0	0	0	0	0	0	0	0	0	0	0	1	0	0
29878	0	0	0	0	0	0	0	0	0	0	0	0	0	0	0	0	0	0	0	0	0	0	0	0	0	0	0	0	0	0	0	0	0	0	0	0	0	0	0	0	0	0	0	0	0	5	0	0	0
27558	5	0	0	1	3	0	0	0	0	0	0	0	0	0	0	0	1	0	0	0	1	3	0	0	0	0	3	3	0	0	0	1	1	0	0	0	0	0	0	0	0	0	0	0	0	0	0	0	0
27509	0	0	0	5	0	0	0	0	0	0	0	0	0	0	0	0	0	0	0	0	0	0	0	0	0	0	0	1	0	0	0	0	0	0	0	0	0	0	0	0	0	0	0	0	0	0	1	0	0
45900	0	0	0	1	3	0	0	0	0	0	0	0	0	0	0	0	1	0	0	0	0	1	0	0	0	0	1	1	0	0	1	1	3	0	0	0	0	0	0	0	0	0	0	0	0	0	3	0	0
45902	0	0	0	1	3	0	0	0	1	0	0	0	0	0	0	0	0	0	0	0	0	3	1	0	0	0	1	3	0	0	0	1	1	0	0	0	0	0	0	0	0	0	0	0	0	0	3	0	0
45903	0	0	0	1	3	0	0	0	0	0	0	0	0	0	0	0	0	0	0	0	0	0	0	0	0	0	0	1	0	0	0	1	1	0	0	0	0	0	0	0	0	0	0	0	0	0	1	0	0
45904	0	0	0	1	1	0	0	0	0	0	0	0	0	0	0	0	0	0	0	0	0	3	0	0	0	0	0	0	0	0	0	0	0	0	0	0	1	0	0	0	0	0	0	0	0	0	1	0	0
45917	0	0	0	1	0	0	0	0	0	0	0	0	0	0	0	0	1	0	0	0	0	3	1	0	0	0	1	1	0	0	0	5	3	0	0	0	0	0	0	0	0	0	0	0	0	0	3	0	1
29943	0	5	0	0	0	0	0	0	0	0	0	0	0	0	0	0	0	0	0	0	0	3	0	0	0	0	0	0	0	0	0	0	0	0	0	0	0	0	0	0	0	0	0	0	0	0	0	0	0
45919	1	5	0	5	0	0	0	0	0	0	0	0	0	0	0	0	0	0	0	0	0	0	0	0	0	0	0	0	0	0	0	0	0	0	0	0	1	0	0	0	0	0	0	0	0	0	1	0	0
45927	1	5	0	1	0	0	0	0	0	0	0	0	0	0	0	0	0	0	0	0	0	1	0	0	0	0	0	0	0	0	0	3	0	0	0	0	1	0	0	0	0	1	0	0	0	0	3	0	0
45928	3	5	0	1	1	0	0	0	0	0	0	5	0	0	0	0	0	0	0	0	0	3	0	0	0	0	0	0	0	0	0	0	0	0	0	0	0	0	0	0	0	0	0	0	0	0	3	0	0
35267	5	0	0	0	0	0	0	0	0	0	0	0	0	0	0	0	0	0	0	0	0	0	0	0	0	0	0	0	0	0	0	0	0	0	0	0	0	0	0	0	3	0	0	0	0	3	1	0	5
35272	5	0	0	0	0	0	0	0	0	0	0	0	0	0	0	0	0	0	0	0	0	0	0	0	0	0	1	1	0	0	0	1	0	0	0	0	0	0	0	0	0	0	0	0	0	5	1	0	5
35275	5	0	0	3	1	0	0	0	0	0	0	0	0	0	0	0	5	0	0	0	0	0	0	0	0	0	0	0	0	0	0	0	0	0	0	0	0	0	0	0	0	0	0	0	0	5	0	0	0
35277	5	0	0	3	0	0	0	0	0	0	0	0	0	0	0	0	1	0	0	0	0	0	0	0	0	0	0	0	0	0	0	1	0	0	0	0	0	0	0	0	0	0	0	0	0	5	0	0	0
27629	0	5	0	5	0	0	0	0	0	0	0	0	0	0	0	0	0	0	0	0	0	3	0	0	0	0	0	0	0	0	0	0	0	0	0	0	0	0	0	0	0	1	0	0	0	0	0	0	0
45944	5	0	0	1	0	0	0	0	0	0	0	0	0	0	0	0	0	0	0	0	0	5	0	0	0	1	5	0	0	0	0	0	0	0	0	0	0	0	0	0	0	0	0	0	0	0	0	0	0
45986	0	0	0	0	0	0	0	0	0	0	0	0	0	0	0	0	0	0	0	0	0	0	0	0	0	0	0	0	0	0	0	0	0	0	0	0	0	0	0	0	0	0	0	0	0	0	3	0	0
45965	0	0	0	0	0	0	0	0	0	0	0	0	0	0	0	0	0	0	0	0	0	0	0	0	0	0	0	0	0	0	0	1	0	0	0	0	0	0	0	0	0	0	0	0	0	0	1	0	0
45968	0	5	0	0	3	0	0	0	0	0	0	0	0	0	0	0	0	0	0	0	0	0	0	0	0	0	1	3	0	0	0	5	0	0	0	0	0	0	0	0	0	0	0	0	0	0	3	0	0
17770	0	0	0	0	0	0	0	0	0	0	0	0	0	0	0	0	1	0	0	0	0	5	0	0	0	0	1	0	0	0	0	3	0	0	0	0	1	0	0	0	0	0	1	0	0	0	0	0	0
17771	5	0	0	3	0	0	0	0	0	1	0	0	0	0	3	0	5	0	0	0	0	3	0	0	0	0	3	0	0	0	1	3	0	0	0	0	0	0	0	0	1	0	1	0	0	0	0	0	1
29935	0	0	0	0	0	0	0	0	0	0	0	0	0	0	0	0	0	0	0	0	0	0	0	0	0	0	3	0	0	0	0	0	0	0	0	0	0	0	0	0	0	0	0	0	0	0	0	0	0
27574	0	0	0	0	0	0	0	0	0	0	0	0	0	0	0	0	0	0	0	0	0	0	0	0	0	0	0	0	0	0	0	1	1	0	0	0	0	0	0	0	0	0	0	0	0	0	1	0	0
27579	0	5	0	1	0	0	0	0	0	0	0	0	0	0	0	0	0	0	0	0	0	0	0	0	0	0	5	0	0	0	0	0	0	0	0	0	0	0	0	0	0	0	0	0	0	0	0	0	0
27599	0	5	0	0	0	0	0	0	0	0	0	0	0	0	0	0	0	0	0	0	0	0	0	0	0	0	3	0	0	0	0	5	0	0	0	0	0	0	0	0	0	0	0	0	0	0	0	0	0
27605	0	5	0	0	3	0	0	0	0	0	0	0	0	0	0	0	3	0	0	0	0	0	0	0	0	1	0	0	0	0	1	3	1	0	0	0	0	0	0	0	0	0	0	0	0	0	0	0	1
27619	0	0	0	0	0	0	0	0	0	0	0	0	0	0	0	0	0	0	0	0	0	0	0	0	0	0	0	1	0	0	0	0	0	0	0	0	0	0	0	0	0	0	0	0	0	0	0	0	0
35294	0	5	0	0	0	0	0	0	0	0	0	0	0	0	0	0	0	0	0	0	0	0	0	0	0	0	3	1	0	0	0	0	1	0	0	0	0	0	0	0	0	0	0	0	0	0	1	0	0
35295	0	0	0	0	0	0	0	0	0	0	0	0	0	0	0	0	1	0	0	0	0	0	0	0	0	0	1	1	0	0	0	5	1	0	0	0	0	0	0	0	0	0	0	0	0	0	1	0	0
35300	0	5	0	3	0	0	0	0	0	0	0	0	0	0	0	0	3	0	0	0	0	3	0	0	0	0	3	1	0	0	1	5	0	0	0	0	0	0	0	0	0	0	0	0	0	0	1	0	1
29899	0	0	0	1	0	0	0	0	0	0	0	0	0	0	0	0	0	0	0	0	0	0	0	0	0	1	3	0	0	0	0	0	0	0	0	0	0	0	0	0	0	0	0	0	0	0	0	0	0
49153	0	5	0	1	0	0	0	0	0	0	0	0	0	0	0	0	3	0	0	0	0	3	0	0	0	0	3	0	0	0	1	3	0	0	0	0	0	0	0	0	0	0	0	0	0	0	0	0	1
17805	5	0	0	3	0	0	0	0	0	0	0	0	0	0	0	0	5	0	0	0	0	3	0	0	0	0	3	0	0	0	0	3	0	0	0	0	0	0	0	0	3	0	0	0	0	0	0	0	1
49220	0	0	0	1	0	0	0	0	0	0	0	0	0	0	0	0	0	0	0	0	0	0	0	0	0	0	1	0	0	0	0	1	0	0	0	0	0	0	0	0	0	0	0	0	0	0	0	0	0
49229	0	5	0	0	0	0	0	0	0	0	0	0	0	0	0	0	0	0	0	0	0	1	1	0	0	0	3	0	0	0	0	3	0	0	0	0	0	0	0	0	0	0	0	0	0	0	0	0	1
16866	0	0	0	0	0	0	0	0	0	0	0	0	0	0	0	0	0	0	0	0	0	0	0	0	0	1	1	0	0	0	0	1	0	0	0	0	0	0	0	0	0	0	0	0	0	0	0	0	0
17769	0	5	0	3	0	0	0	0	0	0	0	0	0	0	0	0	3	0	0	0	0	1	0	0	0	0	5	0	0	0	0	3	0	0	0	0	0	0	0	0	0	0	0	0	0	0	0	0	1
17773	5	0	0	5	0	0	0	0	0	0	0	0	5	1	0	0	5	0	0	0	0	3	0	0	0	1	5	0	0	0	1	5	0	0	0	0	0	0	0	1	0	0	0	0	1	0	0	0	0
17774	5	0	0	3	0	0	0	0	0	0	0	0	0	0	0	0	5	0	0	0	0	5	0	0	0	0	3	0	0	0	0	5	0	0	0	0	0	0	0	0	0	0	0	0	0	0	0	0	0
17776	0	5	0	1	0	0	0	0	0	0	0	0	0	0	0	0	1	0	0	0	0	1	0	0	0	0	5	1	0	0	0	1	0	0	0	0	0	0	0	0	0	0	0	0	0	0	0	0	0
17782	0	0	0	3	0	0	0	0	0	0	0	0	0	0	0	0	1	0	0	0	0	1	0	0	0	0	3	1	1	0	0	3	0	0	0	0	0	0	0	0	0	0	0	0	0	0	0	0	1
49240	0	5	0	1	0	0	0	0	0	0	0	0	0	0	0	0	1	0	0	0	0	1	0	0	0	0	3	0	0	0	0	3	0	0	0	0	0	0	0	0	0	0	0	0	0	0	0	0	0
17790	0	5	0	3	0	0	0	0	0	0	0	0	0	0	0	0	1	0	0	0	0	5	0	0	0	0	3	0	1	0	1	3	0	1	0	0	0	0	0	0	0	0	0	0	0	0	0	0	1
17794	0	5	0	3	0	0	0	0	0	0	0	0	0	0	0	0	1	0	0	0	0	1	0	0	0	0	3	0	0	0	0	3	0	0	0	0	0	0	0	0	0	0	0	0	0	0	0	0	1
16846	0	0	0	3	0	0	0	0	0	0	0	0	0	0	0	0	1	0	0	0	0	1	0	0	0	0	3	0	0	0	0	3	0	0	0	0	0	0	0	0	0	0	0	0	0	0	0	0	1
16847	0	0	0	1	0	0	0	0	0	0	0	0	0	0	0	0	3	0	0	0	0	3	0	0	0	0	1	0	0	0	0	3	0	0	0	0	0	0	0	0	0	0	0	0	0	0	0	0	0
15760	0	0	0	1	0	0	0	0	0	0	0	0	0	0	0	0	0	0	0	0	0	1	0	0	0	0	3	0	0	0	0	5	0	0	0	0	0	0	0	0	0	0	0	0	0	0	0	0	0
15762	0	5	0	1	0	0	0	0	0	0	0	0	0	0	0	0	1	0	0	0	0	1	0	0	0	0	3	0	0	0	0	1	0	0	0	0	0	0	0	0	0	0	0	0	0	0	0	0	0
17575	1	0	0	3	0	0	0	0	0	0	0	0	0	0	0	0	1	0	0	0	0	1	0	0	0	0	3	0	0	0	0	3	0	0	0	0	0	0	0	0	0	0	0	0	0	0	0	0	0
17578	0	0	0	3	0	0	0	0	0	0	1	0	0	0	0	0	3	0	0	0	0	1	0	0	0	0	3	0	0	0	0	3	0	0	0	0	0	0	0	0	0	0	0	0	0	0	0	0	0
49005	0	0	0	3	0	0	0	0	0	0	0	0	0	0	0	0	3	0	0	0	0	3	0	0	0	0	3	0	0	0	0	3	0	0	0	0	0	0	0	0	0	0	0	0	0	0	0	0	1
49029	0	0	0	0	0	0	0	0	0	0	0	0	0	0	0	0	0	0	0	0	0	0	0	0	0	0	3	0	0	0	0	3	0	0	0	0	0	0	0	0	0	0	0	0	0	0	0	0	0
49030	0	0	0	0	0	0	0	0	0	0	0	0	0	0	0	0	0	0	0	0	0	0	0	0	0	0	3	0	0	0	0	3	0	0	0	0	0	0	0	0	0	0	0	0	0	0	0	0	1
49049	0	0	0	3	0	0	0	0	0	0	0	0	0	0	0	0	1	0	0	0	0	1	0	0	0	0	3	1	0	0	0	3	1	0	0	0	0	0	0	0	0	0	0	0	0	0	0	0	0
49050	0	0	0	1	0	0	0	0	0	0	0	0	0	0	0	0	1	0	0	0	0	1	0	0	0	0	1	0	0	0	0	1	0	0	0	1	1	0	1	0	0	0	0	0	0	0	0	0	1
49051	0	0	0	3	0	0	0	0	0	0	0	5	0	0	0	0	3	0	0	0	0	3	0	0	0	0	5	0	0	0	1	5	3	0	0	0	0	0	0	0	0	0	0	0	0	0	1	0	3
49052	0	5	0	3	0	0	0	0	0	0	0	0	0	0	0	0	3	0	0	0	0	3	0	0	0	0	3	0	0	0	0	3	0	0	0	0	0	0	0	0	0	0	0	1	0	0	0	0	1
49053	0	0	0	3	0	0	0	0	0	0	0	0	0	0	0	0	3	0	0	0	0	3	0	0	0	0	3	0	0	0	0	3	0	0	0	0	0	0	3	0	0	0	0	3	0	0	1	0	0
49083	0	0	0	1	0	0	0	0	0	0	0	0	0	0	0	0	1	0	0	0	0	1	0	0	0	0	3	1	0	0	0	3	0	0	0	0	0	0	0	0	0	0	0	0	0	0	0	0	1
49126	5	0	0	3	0	0	0	0	0	0	0	0	0	0	0	0	1	0	0	0	0	0	0	0	0	0	1	0	0	0	0	1	0	0	0	0	0	0	0	0	0	0	0	0	0	0	0	0	1
49127	5	0	0	3	0	0	0	0	0	0	0	0	0	0	0	0	5	0	0	0	0	3	0	0	0	0	3	0	0	0	0	3	0	0	0	0	0	0	0	0	0	0	0	0	0	0	0	1	1
49132	5	0	0	5	0	0	0	0	0	0	0	0	0	0	0	0	5	0	0	0	0	3	0	0	0	0	3	0	0	0	0	5	0	0	0	0	0	0	0	0	0	0	0	0	0	0	0	0	5
49133	5	0	0	5	0	0	0	0	0	0	0	0	0	0	0	0	1	0	0	0	0	1	0	0	0	0	3	0	0	0	0	1	0	0	0	0	0	3	0	0	0	0	0	0	0	0	0	0	0
49103	0	0	0	3	0	0	0	0	0	0	0	0	0	0	0	0	1	0	0	0	0	1	0	0	0	0	1	0	0	0	0	3	0	0	0	0	0	0	0	0	0	0	0	0	0	0	0	0	1
17618	0	5	0	1	3	0	0	0	0	0	0	0	0	0	0	0	1	0	0	0	0	3	0	0	0	0	1	0	0	0	0	3	3	0	0	0	0	0	0	0	0	0	0	0	0	0	0	0	1
17622	0	0	0	1	0	0	0	0	0	0	0	0	0	0	0	0	1	0	0	0	0	1	0	0	0	0	3	0	0	0	0	3	0	0	0	0	0	0	1	0	0	0	0	1	0	0	0	0	1
17623	0	0	0	1	0	0	0	0	0	0	0	0	0	0	0	0	1	0	0	0	0	1	0	0	0	0	3	0	0	0	0	3	0	0	0	0	0	0	0	0	0	0	0	0	0	0	0	0	1
17628	0	5	0	3	0	0	0	0	0	0	0	0	0	0	0	0	3	0	0	0	0	3	0	0	0	0	3	0	0	0	0	3	0	0	0	0	0	0	0	0	0	0	0	0	0	0	0	0	1
17631	0	0	0	1	0	0	0	0	0	0	0	0	0	0	0	0	1	0	0	0	0	1	0	0	0	0	3	0	0	0	0	3	0	0	0	0	0	0	0	0	0	0	0	0	0	0	0	0	1
17638	0	0	0	1	0	0	0	0	0	0	0	0	0	0	0	0	1	0	0	0	0	1	0	0	0	0	3	0	0	0	0	3	0	0	0	0	0	0	0	0	0	0	0	0	0	0	0	0	1
17645	5	0	0	3	0	0	0	0	0	0	0	0	0	0	0	0	3	0	0	0	0	3	0	0	0	0	3	0	0	0	0	3	1	0	0	0	0	0	0	0	0	0	0	0	0	0	1	0	3
15743	0	0	0	0	0	0	0	0	0	0	0	0	0	0	0	0	3	0	0	0	0	1	0	0	0	0	1	0	0	0	0	0	0	0	0	0	0	0	0	0	0	0	0	0	0	0	0	0	0
15744	0	0	0	0	0	0	0	0	0	0	0	0	0	0	0	0	1	0	0	0	0	0	0	0	0	0	1	0	0	0	0	1	0	0	0	0	0	0	0	0	0	0	0	0	0	0	0	0	0
49094	5	0	0	1	0	0	0	0	0	0	0	0	0	0	0	0	1	0	0	0	0	1	0	0	0	0	1	0	0	0	0	1	0	0	0	0	0	0	1	0	0	0	0	1	0	0	0	0	1
15737	5	0	0	1	0	0	0	0	0	0	0	0	0	0	0	0	1	0	0	0	0	3	0	0	0	0	3	0	0	0	0	3	0	0	0	0	0	0	0	1	0	0	0	0	0	0	0	0	0
15738	5	0	1	3	0	0	0	5	0	0	0	0	0	0	0	0	1	0	0	0	0	3	0	0	0	3	1	3	0	0	0	1	3	0	0	0	0	0	0	0	0	0	0	0	0	0	0	0	0
49086	5	0	0	1	0	0	0	0	0	0	0	0	0	0	0	0	1	0	0	0	0	1	0	0	0	0	3	0	0	0	0	3	0	0	0	0	0	0	0	0	0	0	0	0	0	0	0	0	1
16765	5	0	0	3	0	0	0	0	0	0	0	0	0	0	0	0	1	0	0	0	0	1	0	0	0	0	3	0	0	0	0	3	0	0	0	0	0	0	0	0	0	0	0	0	0	0	0	0	0
16766	5	0	0	3	0	0	0	0	0	0	0	0	0	0	0	0	1	0	0	0	0	3	0	0	0	0	3	0	0	0	0	3	0	0	0	0	0	0	0	0	0	0	0	0	0	0	0	0	0
16767	5	0	0	3	0	0	0	0	0	0	0	0	0	0	0	0	0	0	0	0	0	0	0	0	0	0	3	0	0	0	0	3	0	0	0	0	0	0	0	0	0	0	0	0	0	0	0	0	0
49081	5	0	0	0	0	0	0	5	3	0	0	0	0	0	0	0	0	0	0	0	0	0	0	0	0	0	3	0	0	0	0	3	0	0	0	0	1	0	1	0	0	1	0	1	0	0	3	0	0
49082	5	0	0	0	1	0	0	0	0	0	0	0	0	0	0	0	1	1	0	0	0	1	1	0	0	0	1	1	0	0	0	0	0	0	0	0	0	0	0	0	0	1	0	1	0	0	0	0	1
49079	5	0	0	0	0	0	0	0	0	0	0	0	0	0	0	0	0	0	0	0	0	0	0	0	0	0	3	0	0	0	0	3	0	0	0	0	1	0	0	0	0	0	0	0	0	0	0	0	1
49080	5	0	0	1	0	0	0	0	0	0	0	0	0	0	0	0	1	0	0	0	0	1	0	0	0	0	3	0	0	0	0	3	0	0	0	1	0	0	1	0	3	1	0	3	0	0	0	0	1
15709	5	0	0	3	0	0	0	0	0	0	0	0	0	0	0	0	3	0	0	0	0	3	0	0	0	0	3	0	0	0	0	3	0	0	0	0	0	0	0	0	0	0	0	0	0	0	0	0	0
49035	5	0	0	1	0	0	0	0	0	0	0	0	0	0	0	0	1	0	0	0	0	1	0	0	0	3	3	0	0	0	5	0	0	0	0	0	0	0	0	0	0	0	0	0	0	5	1	0	5
49033	0	0	0	1	0	0	0	0	0	0	0	0	0	0	0	0	1	0	0	0	0	1	0	0	0	0	3	0	0	0	0	3	0	0	0	0	0	0	0	0	0	0	0	0	0	0	0	0	1
49034	0	0	1	3	0	0	0	0	0	0	0	0	0	0	0	0	1	0	0	0	0	1	0	0	0	0	3	0	0	0	0	3	0	0	0	0	0	0	0	0	0	0	0	0	0	0	0	0	1
49031	0	0	0	1	0	0	0	0	0	0	0	0	0	0	0	0	0	0	0	0	0	0	0	0	0	0	3	0	0	0	0	3	0	0	0	0	1	0	1	0	0	1	0	1	0	0	1	0	1
49032	0	0	0	1	0	0	0	0	0	0	0	0	0	0	0	0	1	0	0	0	0	1	0	0	0	0	1	0	0	0	0	1	0	0	0	0	0	0	0	0	0	0	0	0	0	0	1	0	1
15685	5	0	0	1	0	5	0	0	0	0	0	0	0	0	0	0	3	0	0	3	0	3	0	0	3	1	3	0	5	0	1	3	0	3	0	0	0	0	0	5	0	0	0	0	5	0	0	0	0
15686	5	0	0	3	0	5	0	0	0	0	0	0	0	0	0	5	0	0	0	0	0	3	0	0	0	0	3	0	3	0	0	3	0	3	0	0	0	0	0	3	0	0	0	0	0	0	0	0	0
15683	5	0	0	5	0	3	0	0	0	0	0	5	0	0	0	0	3	0	0	0	0	3	0	0	0	1	1	0	0	0	1	1	0	0	0	0	0	0	0	5	1	0	0	3	3	0	0	0	0
15684	5	0	1	3	0	0	0	0	0	0	0	0	0	0	0	0	5	0	0	0	1	5	0	0	0	0	3	0	3	0	0	3	0	3	0	0	0	0	0	3	0	0	0	0	0	0	0	0	0
15680	5	0	0	5	0	0	0	0	0	0	0	0	0	0	0	1	5	0	0	0	1	5	0	0	0	0	3	0	0	0	0	3	0	0	0	0	0	0	0	3	0	0	0	0	3	0	0	0	0
15676	0	5	0	0	0	0	0	0	0	0	0	0	0	0	0	0	1	0	0	0	0	1	0	0	0	3	1	0	0	0	0	3	0	0	0	0	0	0	0	0	0	0	0	0	0	0	0	0	0
16704	5	0	0	1	0	5	0	0	0	0	0	0	0	0	0	0	0	0	0	5	0	0	0	0	5	0	3	0	5	0	0	3	0	5	0	0	0	0	0	0	0	0	0	0	0	0	0	0	0
16705	5	0	0	5	0	0	0	0	0	0	0	0	0	0	0	0	1	0	0	0	0	0	0	0	0	0	3	0	0	0	0	3	0	0	0	1	0	0	0	0	0	0	0	0	0	0	0	0	0
16686	1	0	0	1	0	0	0	0	0	0	0	0	0	0	0	0	3	0	0	0	0	1	0	0	0	0	3	0	0	0	1	3	3	0	0	0	0	0	0	0	3	0	0	0	0	0	0	0	0
16699	0	5	0	1	0	0	0	0	0	0	0	0	0	0	0	0	1	0	0	0	0	1	0	0	0	1	3	0	0	0	1	3	0	0	0	0	0	0	0	0	0	0	0	0	0	0	0	0	0
17567	3	5	1	3	0	0	0	0	0	0	0	0	0	0	0	0	3	0	0	0	0	3	0	0	0	0	3	0	0	0	0	3	0	0	0	0	0	0	0	0	0	0	0	0	0	0	0	0	1
15687	5	5	0	3	0	3	0	0	0	0	0	0	0	0	0	0	5	0	0	1	0	1	0	0	3	0	5	0	5	0	0	5	0	5	0	0	0	0	0	0	0	0	0	0	0	5	0	0	0
15688	5	0	0	3	0	3	0	0	0	0	0	3	1	0	0	0	1	0	0	0	0	3	0	0	0	0	3	0	3	0	1	1	0	1	0	0	0	0	0	0	0	0	0	0	0	0	0	0	0
49024	5	0	0	0	0	0	0	0	1	0	0	0	1	0	0	0	0	0	0	0	0	0	0	0	0	0	1	0	0	0	0	1	0	0	0	1	0	0	3	0	1	1	0	1	0	0	1	1	0
49023	5	0	0	1	0	0	0	0	0	0	0	0	0	0	0	0	1	0	0	0	0	1	0	0	0	0	3	0	0	0	0	3	0	0	0	0	0	0	0	0	0	0	0	1	0	0	0	0	1
17554	0	5	0	0	0	0	0	0	0	0	0	0	0	0	0	0	0	0	0	0	0	0	0	0	0	0	0	0	0	0	0	0	0	0	0	0	0	0	0	0	0	0	0	0	0	0	0	0	0
49061	0	5	0	3	0	0	0	0	0	0	0	0	0	0	0	0	3	1	0	0	0	3	0	0	0	0	3	0	0	0	0	3	0	0	0	0	0	0	1	0	0	0	0	1	0	0	0	0	1
49056	0	0	0	1	1	0	0	0	0	0	0	0	0	0	0	0	1	0	0	0	0	1	0	0	0	1	3	0	0	0	0	3	0	0	0	0	0	0	0	0	0	0	0	0	0	0	0	0	1
49057	0	0	0	1	0	0	0	0	0	0	0	0	0	0	0	0	1	0	0	0	0	1	0	0	0	0	3	0	0	0	0	3	0	0	0	0	0	0	0	0	0	0	0	0	0	0	0	0	1
49058	0	0	0	1	0	0	0	0	0	0	0	0	0	0	0	0	3	0	0	0	0	1	0	0	0	0	3	0	0	0	0	3	0	0	0	0	0	0	0	0	3	0	0	3	0	0	0	0	3
49059	0	0	0	3	0	0	0	0	0	0	0	0	0	0	0	0	3	0	0	0	0	3	0	0	0	0	3	0	0	0	0	3	1	0	0	0	0	0	0	0	0	0	0	0	0	0	0	0	1
49060	0	0	0	1	0	0	0	0	0	0	0	0	0	0	0	0	1	0	0	0	0	1	0	0	0	0	3	0	0	0	0	3	0	0	0	1	0	0	1	0	1	0	0	1	0	0	0	0	1
49078	0	0	0	1	0	0	0	0	0	0	0	0	0	0	0	0	3	0	0	0	0	3	1	0	0	0	3	0	0	0	0	3	0	0	0	0	0	0	0	0	0	0	0	0	0	0	0	0	0
16724	0	0	0	3	0	0	0	0	0	0	0	0	0	0	0	0	3	0	0	0	0	1	0	0	0	0	3	0	0	0	0	3	0	0	0	0	0	0	0	0	0	0	0	0	0	0	0	0	0
16725	0	5	0	1	0	0	0	0	0	0	0	0	0	0	0	0	1	0	0	0	0	1	0	0	0	0	1	0	0	0	0	3	0	0	0	0	0	0	0	0	0	0	0	0	0	0	0	0	0
16734	0	0	0	3	0	0	0	0	0	0	0	0	0	0	0	0	0	0	0	0	0	1	0	0	0	0	1	0	0	0	3	0	0	0	0	0	0	0	0	0	0	0	0	0	0	0	0	0	0
16738	0	0	0	1	0	0	0	0	0	0	0	0	0	0	0	0	1	0	0	0	0	1	0	0	0	3	0	0	0	0	0	1	0	0	0	0	0	0	0	0	0	0	0	0	0	0	0	0	0
16742	0	0	0	1	0	0	0	0	0	0	0	0	0	0	0	0	1	0	0	0	1	0	0	0	0	0	3	0	0	0	0	1	0	0	0	0	0	0	0	0	0	0	0	0	0	0	0	0	0
16745	0	5	0	3	0	0	0	0	0	0	0	0	0	0	0	0	0	0	0	0	0	0	0	0	0	0	1	0	0	0	0	3	0	0	0	1	0	0	0	0	1	0	0	0	0	0	0	0	0
17706	5	0	3	5	0	0	0	0	0	0	0	0	0	0	0	0	5	0	0	0	0	3	0	0	0	0	5	0	0	0	0	5	0	0	0	0	0	0	0	0	0	0	0	0	0	0	0	0	1
49163	5	0	0	1	0	0	0	0	0	0	0	0	0	0	0	0	1	0	0	0	0	1	0	0	0	0	3	0	0	0	0	3	0	0	0	0	0	0	0	0	0	0	0	0	0	0	1	0	1
49164	5	0	0	3	0	0	0	0	0	0	0	0	0	0	0	0	1	0	0	0	0	1	0	0	0	1	0	0	0	0	0	3	0	0	0	0	0	0	0	0	1	1	0	0	0	0	1	0	1
49165	3	5	0	3	1	0	0	0	0	0	0	0	0	0	0	0	3	0	0	0	0	3	0	0	0	0	3	0	0	0	0	3	0	0	0	0	0	0	0	0	0	0	0	0	0	0	1	0	1
49187	0	0	0	0	0	0	0	0	0	0	0	0	0	0	0	0	0	0	0	0	0	0	0	0	0	0	3	0	0	0	0	3	0	0	0	0	1	0	0	0	0	0	0	0	0	0	0	0	1
49188	0	0	0	0	0	0	0	0	0	0	0	0	0	0	0	0	0	0	0	0	0	0	0	0	0	1	0	0	0	0	0	3	0	0	0	1	0	0	1	0	0	0	0	0	0	0	0	0	1
49189	0	0	0	0	0	0	0	0	0	0	0	0	0	0	0	0	0	0	0	0	0	0	0	0	0	0	0	0	0	0	0	0	0	0	0	0	0	0	0	0	0	0	0	0	0	0	0	0	1
49190	0	0	0	3	0	0	0	0	0	0	0	0	0	0	0	0	3	0	0	0	0	3	0	0	0	0	3	0	0	0	0	3	0	0	0	0	1	0	1	0	0	0	0	0	0	0	0	0	1
49191	5	0	0	3	0	0	0	0	0	0	0	0	0	0	0	0	1	0	0	0	0	1	0	0	0	0	0	0	0	0	0	3	0	0	0	0	0	0	0	0	3	1	3	3	0	1	0	0	3
49192	5	0	0	3	0	0	0	0	0	0	0	0	0	0	0	0	3	0	0	0	0	3	0	0	0	0	3	0	0	0	0	3	0	0	0	0	0	0	0	0	0	0	0	0	0	0	1	0	1
15876	0	0	0	5	0	0	0	0	0	0	0	0	0	0	0	0	1	0	0	0	0	1	0	0	0	0	3	0	0	0	1	3	0	0	0	1	0	0	0	0	1	0	0	0	0	0	0	0	0
15882	0	5	0	3	0	0	0	0	0	0	0	0	0	0	0	0	1	0	0	0	0	1	0	0	0	0	5	0	0	0	1	3	0	0	0	0	0	0	0	0	0	0	0	0	0	0	0	0	0
49207	5	0	0	3	0	0	0	0	0	0	0	0	0	0	0	0	1	0	0	0	0	1	0	0	0	0	3	0	0	0	0	3	0	0	0	0	0	0	0	0	0	0	0	0	0	5	0	0	5
49208	5	0	0	3	0	0	0	0	0	0	0	0	0	0	0	0	1	0	0	0	0	1	0	0	0	0	3	0	0	0	0	0	0	0	0	0	0	0	0	0	0	0	0	0	0	3	1	0	3
49209	0	5	0	3	0	0	0	0	0	0	0	0	0	0	0	0	3	0	0	0	0	3	0	0	0	0	5	1	0	0	0	5	0	0	0	0	0	0	1	0	0	0	0	1	0	0	0	0	1
49212	0	5	0	0	0	0	0	0	0	0	0	0	0	0	0	0	1	0	0	0	0	1	0	0	0	0	3	0	0	0	0	3	0	0	0	0	0	0	1	0	0	0	0	1	0	0	0	0	1
49214	0	5	0	1	0	0	0	0	0	0	0	0	0	0	0	0	1	0	0	0	0	1	0	0	0	0	3	0	0	0	0	3	0	0	0	0	0	0	1	0	0	0	0	0	0	0	1	0	1
16855	0	0	0	1	0	0	0	0	0	0	0	0	0	0	0	0	3	0	0	0	0	1	0	0	0	0	1	0	0	0	0	3	0	0	0	0	0	0	0	0	0	0	0	0	0	0	0	0	0
16856	0	0	0	1	0	0	0	0	0	0	0	0	0	0	0	0	3	0	0	0	0	1	0	0	0	1	3	0	0	0	0	3	0	0	0	0	0	0	0	0	0	0	0	0	0	0	0	0	0
15894	0	0	0	3	0	0	0	0	0	0	0	0	0	0	0	0	1	0	0	0	0	3	0	0	0	0	3	0	0	0	0	3	0	0	0	0	0	0	0	0	0	0	0	0	0	0	0	0	0
17723	0	5	0	1	1	0	0	0	0	0	0	0	0	0	0	0	1	0	0	0	0	1	0	0	0	0	3	1	0	0	0	3	1	0	0	0	0	0	0	0	0	0	0	0	0	0	0	0	0
17724	0	0	0	1	0	0	0	0	0	0	0	0	0	0	0	0	1	0	0	0	0	1	0	0	0	0	0	0	0	0	0	5	0	0	0	0	0	0	0	0	0	0	0	0	0	0	0	0	0
17726	5	0	0	1	0	1	0	0	0	0	0	0	0	0	0	0	1	0	0	0	0	3	0	0	0	0	1	1	1	0	0	1	1	1	0	0	0	0	0	0	0	0	0	0	0	0	0	0	0
17727	5	0	0	1	0	0	0	0	0	0	1	0	0	0	0	0	1	0	0	0	0	1	0	0	0	0	3	0	0	0	0	3	0	0	0	0	0	0	0	0	0	0	0	0	0	0	0	1	1
17729	0	5	0	1	0	0	0	0	0	0	0	0	0	0	0	0	3	0	0	0	0	3	0	0	0	0	3	0	0	0	0	3	0	0	0	0	1	0	0	0	0	0	0	0	0	0	0	0	1
17730	5	0	0	1	0	0	0	0	0	0	0	0	0	0	0	0	1	0	0	0	0	1	0	0	0	0	3	0	0	0	0	3	0	0	0	0	0	0	0	0	0	0	0	0	0	0	0	0	0
17745	0	5	3	3	0	0	0	0	0	0	0	0	0	0	0	1	1	0	0	0	0	1	0	0	0	1	3	0	1	0	3	3	0	3	0	0	0	0	0	1	0	0	0	0	0	0	0	0	1
49194	0	0	0	0	0	0	0	0	0	0	0	0	0	0	0	0	0	0	0	0	0	0	0	0	0	0	1	0	0	0	0	1	0	0	0	0	0	0	0	0	0	0	0	0	0	0	0	0	1
49195	0	0	0	0	0	0	0	0	0	0	0	0	0	0	0	0	0	0	0	0	0	0	0	0	0	0	1	0	0	0	0	3	0	0	0	0	0	0	0	0	0	0	0	0	0	0	0	0	1
49196	0	0	0	1	0	0	0	0	0	0	0	0	0	0	0	0	1	0	0	0	0	1	0	0	0	0	3	0	0	0	3	5	0	0	0	0	0	0	0	0	0	0	0	0	0	0	0	0	1
49197	0	0	0	0	0	0	0	0	0	0	0	0	0	0	0	0	0	0	0	0	0	0	0	0	0	0	3	0	0	0	0	3	0	0	0	0	0	0	0	0	0	0	0	0	0	0	1	0	1
49199	0	0	0	0	0	0	0	0	0	0	0	0	0	0	0	0	1	0	0	0	0	1	0	0	0	0	3	0	0	0	0	3	0	0	0	0	0	0	0	0	0	0	0	0	0	0	0	0	1
49200	0	5	0	1	0	0	0	0	0	0	0	0	0	0	0	0	1	0	0	0	0	1	0	0	0	0	1	0	0	0	0	3	0	0	0	0	0	0	0	0	0	0	0	0	0	0	0	0	1
49201	0	5	0	1	0	0	0	0	0	0	0	0	0	0	0	0	1	0	0	0	0	1	0	0	0	0	3	0	0	0	0	3	0	0	0	0	0	0	0	0	0	0	0	0	0	0	0	0	1
49203	0	5	0	3	0	0	0	0	0	0	0	0	0	0	0	0	3	0	0	0	0	3	0	0	0	0	3	1	0	0	0	3	0	0	0	0	0	0	1	0	0	0	0	0	0	0	0	0	1
17714	0	0	0	1	0	0	0	0	0	0	0	0	0	0	0	0	1	0	0	0	0	0	0	0	0	0	3	0	0	0	0	3	0	0	0	0	0	0	0	0	0	0	0	0	0	0	0	0	0
17715	0	0	0	1	0	0	0	0	0	0	0	0	0	0	0	0	1	0	0	0	0	1	0	0	0	0	5	0	0	0	0	3	0	0	0	0	0	0	0	0	0	0	0	0	0	0	0	0	0
16862	0	0	0	3	0	0	0	0	0	0	0	0	0	0	0	0	1	0	0	0	0	3	0	0	0	0	3	0	0	0	0	3	0	0	0	0	0	0	0	0	0	0	0	0	0	0	0	0	0
90043	0	0	0	0	0	0	0	0	0	0	0	0	0	0	0	0	0	0	0	0	0	0	0	0	0	0	0	0	0	0	0	0	0	0	0	0	0	0	0	0	0	0	0	0	0	0	0	0	0
90044	0	0	0	0	0	0	0	0	0	0	0	0	0	0	0	0	0	0	0	0	0	0	0	0	0	0	0	0	0	0	0	0	0	0	0	0	0	0	0	0	0	0	0	0	0	0	0	0	0
90045	0	0	0	0	0	0	0	0	0	0	0	0	0	0	0	0	0	0	0	0	0	0	0	0	0	0	0	0	0	0	0	0	0	0	0	0	0	0	0	0	0	0	0	0	0	0	0	0	0
90046	0	0	0	0	0	0	0	0	0	0	0	0	0	0	0	0	0	0	0	0	0	0	0	0	0	0	0	0	0	0	0	0	0	0	0	0	0	0	0	0	0	0	0	0	0	0	0	0	0
90047	0	0	0	0	0	0	0	0	0	0	0	0	0	0	0	0	0	0	0	0	0	0	0	0	0	0	0	0	0	0	0	0	0	0	0	0	0	0	0	0	0	0	0	0	0	0	0	0	0
90050	0	0	0	0	0	0	0	0	0	0	0	0	0	0	0	0	0	0	0	0	0	0	0	0	0	0	0	0	0	0	0	0	0	0	0	0	0	0	0	0	0	0	0	0	0	0	0	0	0
90048	0	0	0	0	0	0	0	0	0	0	0	0	0	0	0	0	0	0	0	0	0	0	0	0	0	0	0	0	0	0	0	0	0	0	0	0	0	0	0	0	0	0	0	0	0	0	0	0	0
90049	0	0	0	0	0	0	0	0	0	0	0	0	0	0	0	0	0	0	0	0	0	0	0	0	0	0	0	0	0	0	0	0	0	0	0	0	0	0	0	0	0	0	0	0	0	0	0	0	0
90001	5	0	0	0	0	0	0	0	0	0	0	0	0	0	0	1	5	3	0	0	0	3	3	0	0	0	0	0	0	0	0	0	0	0	0	0	0	0	1	0	0	0	0	0	0	0	3	0	0
90002	5	0	0	0	0	0	0	0	0	0	0	0	0	0	0	0	0	0	0	0	0	0	0	0	0	3	3	0	0	0	0	1	0	0	0	0	0	0	0	0	0	0	0	0	0	0	0	0	0
90003	5	0	0	0	0	0	0	0	0	0	0	0	0	0	0	0	0	0	0	0	0	0	0	0	0	0	0	0	0	0	5	0	0	0	0	0	0	0	3	0	0	0	0	3	0	0	0	0	0
90004	5	0	0	0	0	0	0	0	0	0	0	5	0	0	0	0	0	0	0	0	0	0	0	0	0	0	0	0	0	0	0	0	0	0	0	0	1	0	0	0	0	0	0	0	0	3	0	0	0
90005	5	0	0	0	0	0	0	5	0	0	0	0	0	0	0	0	0	0	0	0	0	0	0	0	0	0	0	0	0	0	0	0	0	0	0	0	0	0	0	0	3	0	0	3	0	3	0	0	0
90006	5	0	0	0	0	0	0	0	0	0	0	0	0	0	0	0	0	0	0	0	0	0	0	0	0	3	5	0	0	0	0	0	0	0	0	0	0	0	0	0	0	0	0	0	0	0	0	0	0
90007	0	0	0	0	0	0	0	0	0	0	0	5	0	0	0	0	0	0	0	0	0	0	0	0	0	0	0	0	0	0	0	0	0	0	0	0	0	0	0	0	0	0	0	0	0	3	0	0	0
90024	0	0	0	0	0	0	0	0	0	0	0	0	0	0	0	0	0	0	0	0	0	0	0	0	0	0	0	0	0	0	0	0	0	0	0	0	0	0	0	0	0	0	0	0	0	0	1	0	0
90025	0	0	0	0	0	0	0	0	0	0	0	0	0	0	0	0	0	0	0	0	0	0	0	0	0	0	0	0	0	0	0	0	0	0	0	0	0	0	0	0	0	0	0	0	0	0	0	0	0
90026	0	0	0	0	0	0	0	0	0	0	0	0	0	0	0	0	0	0	0	0	0	0	0	0	0	0	0	0	0	0	0	0	0	0	0	0	0	0	0	0	0	0	0	0	0	0	0	0	0
90027	0	0	0	0	0	0	0	0	0	0	0	0	0	0	0	0	0	0	0	0	0	0	0	0	0	0	0	0	0	0	0	0	0	0	0	0	0	0	0	0	0	0	0	0	0	0	0	0	0
90029	0	0	0	0	0	0	0	0	0	0	0	0	0	0	0	0	0	0	0	0	0	0	0	0	0	0	0	0	0	0	0	0	0	0	0	0	0	0	0	0	0	0	0	0	0	0	0	0	0
90030	0	0	0	0	0	0	0	0	0	0	0	0	0	0	0	0	0	0	0	0	0	0	0	0	0	0	0	0	0	0	0	0	0	0	0	0	0	0	0	0	0	0	0	0	0	0	0	0	0
90031	0	0	0	0	0	0	0	0	0	0	0	0	0	0	0	0	0	0	0	0	0	0	0	0	0	0	0	0	0	0	0	0	0	0	0	0	0	0	0	0	0	0	0	0	0	0	1	0	0
90032	0	0	0	0	0	0	0	0	0	0	0	0	0	0	0	0	0	0	0	0	0	0	0	0	0	0	0	0	0	0	0	0	0	0	0	0	0	0	0	0	0	0	0	0	0	0	0	0	0
90033	5	0	0	1	0	0	0	0	0	0	0	0	0	0	0	0	0	0	0	0	0	0	0	0	0	0	0	0	0	0	0	0	0	0	0	0	0	0	0	0	0	0	0	0	0	0	0	0	0
90034	0	0	0	0	0	0	0	0	0	0	0	0	0	0	0	0	0	0	0	0	0	0	0	0	0	1	3	0	0	0	0	0	0	0	0	0	0	0	0	0	0	0	0	0	0	0	0	0	0
90035	5	0	0	0	0	0	0	5	0	0	0	0	0	0	0	0	0	0	0	0	0	0	0	0	0	0	0	0	0	0	0	0	0	0	0	0	0	0	0	0	0	0	0	0	0	5	0	0	3
90051	0	0	0	0	0	0	0	0	0	0	0	0	0	0	0	0	0	0	0	0	0	0	0	0	0	0	0	0	0	0	0	0	0	0	0	0	0	0	0	0	0	0	0	0	0	0	0	0	1
90052	0	0	0	0	0	0	0	0	0	0	0	0	0	0	0	0	0	0	0	0	0	0	0	0	0	0	0	0	0	0	0	0	0	0	0	0	0	0	0	0	0	0	0	0	0	0	1	0	0
90053	0	0	0	0	0	0	0	0	0	0	0	0	0	0	0	0	0	0	0	0	0	0	0	0	0	0	0	0	0	0	0	0	0	0	0	0	0	0	0	0	0	0	0	0	0	0	0	0	0
90054	0	0	0	0	0	0	0	0	0	0	0	0	0	0	0	0	0	0	0	0	0	0	0	0	0	0	0	0	0	0	0	0	0	0	0	0	0	0	0	0	0	0	0	0	0	0	1	0	1
90055	0	0	0	0	0	0	0	0	0	0	0	0	0	0	0	0	0	0	0	0	0	0	0	0	0	0	0	0	0	0	0	0	0	0	0	0	0	0	0	0	0	0	0	0	0	0	0	0	0
90056	0	0	0	0	0	0	0	0	0	0	0	0	0	0	0	0	0	0	0	0	0	0	0	0	0	0	0	0	0	0	0	0	0	0	0	0	0	0	0	0	0	0	0	0	0	0	0	0	0
90057	5	0	0	0	0	0	0	0	0	0	0	0	0	0	0	0	3	0	0	0	0	0	0	0	0	0	0	0	0	0	0	3	1	0	0	0	0	0	0	0	0	0	0	0	0	0	0	0	0
90058	5	0	0	0	0	0	0	0	0	0	0	0	0	0	0	0	0	0	0	0	3	5	0	0	0	0	0	0	0	0	0	0	0	0	0	0	0	0	0	0	0	0	0	0	0	0	0	0	0
90059	5	0	0	0	0	0	0	0	0	0	0	0	0	0	0	0	0	0	0	0	0	0	0	0	0	0	0	0	0	0	0	0	0	0	0	0	0	0	0	0	0	0	0	0	0	0	1	0	0
90061	5	0	0	0	0	0	0	0	0	0	0	0	0	0	0	0	0	0	0	0	0	3	0	0	0	0	0	0	0	0	0	3	0	0	0	0	0	0	0	0	0	0	0	0	0	0	0	0	0
90062	5	0	0	0	0	0	0	0	0	0	0	0	0	0	0	0	0	0	0	0	0	0	0	0	0	0	0	0	0	0	0	0	0	0	0	0	0	0	0	0	0	0	0	0	0	0	0	0	0
90063	5	0	0	0	0	0	0	0	0	0	0	0	0	0	0	0	0	0	0	0	0	5	0	0	0	0	0	0	0	0	0	0	0	0	0	0	0	0	0	0	0	0	0	0	0	0	0	0	0
90064	5	0	0	0	0	0	0	0	0	0	0	0	0	0	0	0	3	0	0	0	0	1	0	0	0	0	0	0	0	0	0	0	0	0	0	0	0	0	0	0	0	0	0	0	0	0	0	0	0
90065	5	0	0	0	0	0	0	0	0	0	0	0	0	0	0	0	0	0	0	0	0	0	0	0	0	0	0	0	0	0	0	0	0	0	0	0	0	0	0	0	0	0	0	0	0	0	0	0	0
90066	5	0	0	0	0	0	0	0	0	0	0	0	0	0	0	0	0	0	0	0	0	0	0	0	0	0	0	0	0	0	0	0	0	0	0	0	0	0	0	0	0	0	0	0	0	0	0	0	0
90067	5	0	0	0	0	0	0	0	0	0	0	0	0	0	0	0	0	0	0	0	0	0	0	0	0	0	0	0	0	0	0	0	0	0	0	0	0	0	0	0	0	0	0	0	0	0	0	0	0
90068	5	0	0	0	0	0	0	0	0	0	0	0	0	0	0	0	0	0	0	0	0	3	0	0	0	0	0	0	0	0	0	0	0	0	0	0	0	0	0	0	0	0	0	0	0	0	0	0	0
90069	5	0	0	0	0	0	0	3	0	0	0	0	0	0	0	0	0	0	0	0	0	0	0	0	0	0	0	0	0	0	0	0	0	0	0	0	0	0	0	0	0	0	0	0	0	3	0	0	0
90070	5	0	0	0	0	0	0	0	0	0	0	0	0	0	0	3	5	0	0	0	0	3	0	0	0	0	0	0	0	0	0	0	0	0	0	0	0	0	0	0	0	0	0	0	0	0	0	0	0
90071	5	0	1	5	0	0	0	5	0	0	0	5	0	0	0	0	5	0	0	0	0	3	0	0	0	0	0	0	0	0	0	0	0	0	0	0	0	0	0	0	5	0	0	0	0	5	0	0	0
90072	5	0	0	0	0	0	0	0	0	0	0	0	0	0	0	0	0	0	0	0	0	0	0	0	0	5	0	0	0	0	0	0	0	0	0	0	0	0	0	0	0	0	0	0	0	5	0	0	0
90073	5	0	0	0	0	0	0	0	0	0	0	0	0	0	0	0	0	0	0	0	0	0	0	0	0	0	0	0	0	0	0	0	0	0	0	0	0	0	0	0	0	0	0	0	0	0	0	0	0
90074	5	0	0	0	0	0	0	0	0	0	0	0	0	0	0	0	0	0	0	0	0	0	0	0	0	0	0	0	0	0	0	0	0	0	0	0	0	0	0	0	0	1	0	0	0	0	0	0	0
90075	5	0	0	0	0	0	0	0	0	3	0	0	0	0	0	0	0	0	0	0	0	0	0	0	0	0	0	0	0	0	0	0	0	0	0	0	0	0	0	0	0	0	0	0	0	0	3	0	1
90076	5	0	0	0	0	0	0	0	0	0	0	0	0	0	0	0	0	0	0	0	0	0	0	0	0	0	0	0	0	0	0	0	0	0	0	0	0	0	0	0	0	0	0	0	0	0	0	0	0
90077	5	0	0	0	0	0	0	0	0	0	0	0	0	0	0	0	0	0	0	0	0	0	0	0	0	0	0	0	0	0	0	0	0	0	0	0	0	0	0	0	0	0	0	0	0	0	1	0	0
90078	5	0	0	0	0	0	0	0	0	0	0	0	0	0	0	0	0	0	0	0	0	0	0	0	0	0	0	0	0	0	0	0	0	0	0	0	0	0	0	0	0	0	0	0	0	0	3	0	0
90079	5	0	0	0	0	0	0	0	0	0	0	0	0	0	0	0	0	0	0	0	0	0	0	0	0	0	0	0	0	0	0	0	0	0	0	0	0	0	0	0	0	0	0	0	0	0	1	0	0
90080	5	0	0	0	0	0	0	0	0	0	0	0	0	0	0	0	3	0	0	0	0	3	0	0	0	0	0	0	0	0	0	0	0	0	0	0	0	0	0	0	0	0	0	0	0	0	0	0	0
90081	5	0	0	0	0	0	0	0	0	0	0	0	0	0	0	1	5	0	0	0	1	5	0	0	0	0	0	0	0	0	0	0	0	0	0	0	0	0	0	0	0	0	0	0	0	0	0	0	0
90082	5	0	0	0	0	0	0	0	0	0	0	0	0	0	0	0	0	0	0	0	0	0	0	0	0	0	0	0	0	0	0	0	0	0	0	0	0	0	0	0	0	0	0	0	0	0	0	0	0
90083	5	0	0	0	0	0	0	0	0	0	0	0	0	0	0	0	0	0	0	0	0	0	0	0	0	0	5	0	0	0	0	0	0	0	0	0	0	0	0	0	3	0	0	0	0	0	0	0	0
90084	5	0	0	0	0	0	0	0	0	0	0	0	0	0	0	0	0	0	0	0	0	0	0	0	0	0	0	0	0	0	0	0	0	0	0	3	0	0	5	0	0	0	0	0	0	1	0	0	5
90085	5	0	0	0	0	0	0	5	0	0	0	5	0	0	0	0	0	0	0	0	0	0	0	0	0	0	5	0	0	0	0	0	0	0	0	0	0	0	0	0	5	0	0	0	0	5	0	0	0
90086	5	0	0	0	0	0	0	0	1	0	0	0	0	0	0	0	0	0	0	0	0	0	0	0	0	0	0	0	0	0	0	0	0	0	0	0	0	0	0	0	0	0	0	0	0	0	1	0	0
90119	5	0	0	0	0	0	0	0	0	0	0	0	0	0	0	0	0	0	0	0	3	5	0	0	0	0	0	0	0	0	0	0	0	0	0	0	0	0	0	0	0	0	0	0	0	0	0	0	0
90120	5	0	0	0	0	0	0	0	0	0	0	0	0	0	0	0	5	0	0	0	1	3	0	0	0	5	0	0	0	0	5	0	0	0	0	0	0	0	0	0	0	0	0	0	0	0	0	0	0
90121	5	0	0	0	0	0	0	0	0	0	0	0	0	0	0	0	0	0	0	0	3	3	0	0	0	0	0	0	0	0	0	5	0	0	0	0	0	0	0	0	0	0	0	0	0	0	3	0	0
90122	0	0	0	0	0	0	0	5	0	0	0	0	0	0	0	0	0	0	0	0	0	0	0	0	0	0	0	0	0	0	0	0	0	0	0	0	0	0	0	0	0	0	0	0	0	0	0	0	3
90123	5	0	0	0	0	0	0	0	0	0	0	0	0	0	0	0	0	0	0	0	0	0	0	0	0	0	0	0	0	0	0	0	0	0	0	0	0	0	0	0	0	0	0	0	0	1	1	0	5
90124	5	0	0	0	0	0	0	0	0	0	0	0	0	3	0	0	0	0	0	0	0	0	0	0	0	0	0	0	0	0	0	0	0	0	0	3	0	0	5	0	0	0	0	0	0	0	3	0	0
90125	5	0	0	0	0	0	0	0	0	0	0	0	0	0	0	0	0	0	0	0	0	0	0	0	0	0	0	0	0	0	0	0	0	0	0	0	0	0	0	0	0	0	0	0	0	0	0	0	0
90126	5	0	0	0	0	0	0	0	0	0	0	0	0	0	0	0	0	0	0	0	0	0	0	0	0	0	0	0	0	0	0	0	0	0	0	0	0	0	0	0	0	0	0	0	0	0	0	0	0
90127	5	0	0	0	0	0	0	0	0	0	0	0	0	0	0	0	0	0	0	0	0	0	0	0	0	0	0	3	0	0	0	0	0	0	0	0	0	0	0	0	0	0	0	0	0	0	1	0	0
90128	5	0	0	0	0	0	0	0	0	0	0	0	0	0	0	0	0	0	0	0	0	0	0	0	0	0	0	0	0	0	0	0	0	0	0	0	0	0	0	0	0	0	0	0	0	0	0	0	0
90129	5	0	0	0	0	0	0	0	0	0	0	0	0	0	0	0	0	0	0	0	0	1	0	0	0	0	0	0	0	0	0	0	0	0	0	0	0	0	0	0	0	0	0	0	0	0	0	0	0
90009	0	0	0	0	0	0	0	0	0	0	0	0	0	0	0	0	0	0	0	0	0	0	0	0	0	1	0	0	0	0	0	0	0	0	0	0	0	0	0	0	0	0	0	0	0	0	1	0	1
90010	0	0	0	0	0	0	0	0	0	0	0	0	0	0	0	0	0	0	0	0	0	0	0	0	0	0	0	0	0	0	0	0	0	0	0	0	0	0	0	0	0	0	0	0	0	0	0	0	0
90011	0	0	0	0	0	0	0	0	0	0	0	0	0	0	0	0	0	0	0	0	1	5	0	0	0	0	0	0	0	0	0	3	0	0	0	0	0	0	0	0	0	0	0	0	0	0	0	0	1
90012	0	0	0	0	0	0	0	0	0	0	0	0	0	0	0	0	0	0	0	0	0	0	0	0	0	0	0	0	0	0	0	0	0	0	0	0	0	0	0	0	0	0	0	0	0	0	0	0	0
90013	0	0	0	0	0	0	0	0	0	0	0	0	0	0	0	0	5	0	0	0	0	0	0	0	0	0	0	0	0	0	0	0	0	0	0	0	0	0	0	0	0	0	0	0	0	0	0	0	1
90015	0	0	0	0	0	0	0	0	0	0	0	0	0	0	0	0	0	0	0	0	0	0	0	0	0	0	0	0	0	0	0	0	0	0	0	0	0	0	0	0	0	0	0	0	0	0	1	0	0
90016	0	0	0	0	0	0	0	0	0	0	0	0	0	0	0	0	0	0	0	0	0	0	0	0	0	0	0	0	0	0	0	0	0	0	0	0	0	0	0	0	0	0	0	0	0	0	0	0	0
90017	0	0	0	0	0	0	0	0	0	0	0	0	0	0	0	0	0	0	0	0	0	0	0	0	0	0	0	0	0	0	0	0	0	0	0	0	0	0	0	0	0	0	0	0	0	0	0	0	0
90018	0	0	0	0	0	0	0	0	0	0	0	0	0	0	0	0	0	0	0	0	0	0	0	0	0	0	0	0	0	0	0	0	0	0	0	0	0	0	0	0	0	0	0	0	0	0	0	0	0
90019	0	0	0	0	0	0	0	0	0	0	0	0	0	0	0	0	0	0	0	0	0	0	0	0	0	0	0	0	0	0	0	0	0	0	0	0	0	0	0	0	0	0	0	0	0	0	0	0	0
90020	0	0	0	0	0	0	0	0	0	0	0	0	0	0	0	0	0	0	0	0	0	0	0	0	0	0	0	0	0	0	0	0	0	0	0	0	0	0	0	0	0	0	0	0	0	0	0	0	0
90021	0	0	0	0	0	0	0	0	0	0	0	0	0	0	0	0	0	0	0	0	0	0	0	0	0	0	0	0	0	0	0	0	0	0	0	0	0	0	0	0	0	0	0	0	0	0	0	0	0
90022	0	0	0	0	0	0	0	0	0	0	0	0	0	0	0	0	0	0	0	0	0	0	0	0	0	0	0	0	0	0	0	0	0	0	0	0	0	0	0	0	0	0	0	0	0	0	0	0	0
90023	0	0	0	0	0	0	0	0	0	0	0	0	0	0	0	0	0	0	0	0	0	0	0	0	0	0	0	0	0	0	0	0	0	0	0	0	0	0	0	0	0	0	0	0	0	0	1	0	0
[truncated: 75 more columns]

## Sheet: Factors
FishBarcode	Species	Length_in_cm	Treatment	Vitality immediate	Mortality immediate	Vitality delayed	Mortality delayed
37794	T. thymallus	10,6	Turbine & Screen	5	dead	NA	NA
37795	T. thymallus	26,4	Turbine & Screen	5	dead	NA	NA
37796	T. thymallus	24,7	Turbine & Screen	5	dead	NA	NA
34809	T. thymallus	8,8	Predamage	0	survived	NA	NA
34810	T. thymallus	10,6	Predamage	0	survived	NA	NA
34819	T. thymallus	26,5	Predamage	0	survived	NA	NA
34820	T. thymallus	23,0	Predamage	0	survived	NA	NA
27797	H. hucho	15,3	Predamage	0	survived	5	dead
27786	H. hucho	17,1	Turbine & Screen	5	dead	NA	NA
27787	H. hucho	15,8	Turbine & Screen	5	dead	NA	NA
27788	H. hucho	16,4	Turbine & Screen	5	dead	NA	NA
28923	H. hucho	13,9	Predamage	0	survived	0	survived
28924	H. hucho	14,3	Predamage	0	survived	0	survived
28926	H. hucho	15,4	Predamage	0	survived	0	survived
28927	H. hucho	16,3	Predamage	0	survived	0	survived
28922	H. hucho	14,8	Predamage	0	survived	5	dead
28928	H. hucho	14,6	Predamage	0	survived	0	survived
52220	H. hucho	15,2	Predamage	0	survived	0	survived
27760	H. hucho	15,8	Net	0	survived	NA	NA
38510	H. hucho	15,1	Turbine & Screen	5	dead	NA	NA
52045	H. hucho	15,8	Turbine & Screen	0	survived	0	survived
27757	H. hucho	16,7	Net	0	survived	NA	NA
27758	H. hucho	16,5	Net	0	survived	NA	NA
27759	H. hucho	14,7	Net	0	survived	NA	NA
52213	H. hucho	36,5	Predamage	0	survived	0	survived
28898	H. hucho	15,9	Net	0	survived	0	survived
28902	H. hucho	15,8	Net	0	survived	0	survived
48169	H. hucho	15,6	Predamage	0	survived	NA	NA
48170	H. hucho	13,8	Predamage	0	survived	NA	NA
48171	H. hucho	39,7	Predamage	0	survived	NA	NA
48172	H. hucho	44,3	Predamage	0	survived	NA	NA
52215	H. hucho	38	Predamage	0	survived	0	survived
52037	H. hucho	35,5	Turbine & Screen	5	dead	NA	NA
52038	H. hucho	34,5	Turbine & Screen	5	dead	NA	NA
38548	H. hucho	16,2	Turbine & Screen	5	dead	NA	NA
27735	H. hucho	17,1	Turbine & Screen	0	survived	0	survived
27782	H. hucho	15,4	Turbine & Screen	5	dead	NA	NA
27783	H. hucho	15,1	Turbine & Screen	5	dead	NA	NA
27784	H. hucho	15,3	Turbine & Screen	5	dead	NA	NA
27785	H. hucho	17,7	Turbine & Screen	5	dead	NA	NA
48173	H. hucho	37,1	Predamage	0	survived	NA	NA
38502	H. hucho	15,6	Turbine & Screen	0	survived	NA	NA
38497	H. hucho	14,9	Turbine & Screen	0	survived	5	dead
48029	H. hucho	16,6	Turbine & Screen	5	dead	NA	NA
48030	H. hucho	14,5	Turbine & Screen	5	dead	NA	NA
48047	H. hucho	17,6	Turbine & Screen	0	survived	0	survived
52225	H. hucho	15,5	Predamage	0	survived	0	survived
52226	H. hucho	15,4	Predamage	0	survived	0	survived
38511	H. hucho	14,5	Turbine & Screen	5	dead	NA	NA
38512	H. hucho	15,5	Turbine & Screen	5	dead	NA	NA
38513	H. hucho	15,1	Turbine & Screen	5	dead	NA	NA
38514	H. hucho	15,5	Turbine & Screen	5	dead	NA	NA
38515	H. hucho	14,1	Turbine & Screen	5	dead	NA	NA
28865	H. hucho	17,1	Turbine & Screen	5	dead	NA	NA
28866	H. hucho	15,9	Turbine & Screen	5	dead	NA	NA
28867	H. hucho	17,3	Turbine & Screen	5	dead	NA	NA
28868	H. hucho	14,4	Turbine & Screen	5	dead	NA	NA
38516	H. hucho	15,2	Turbine & Screen	5	dead	NA	NA
38517	H. hucho	14,8	Turbine & Screen	5	dead	NA	NA
38518	H. hucho	15,6	Turbine & Screen	5	dead	NA	NA
38519	H. hucho	15,4	Turbine & Screen	5	dead	NA	NA
38520	H. hucho	15,9	Turbine & Screen	5	dead	NA	NA
27766	H. hucho	16,4	Net	0	survived	0	survived
27769	H. hucho	15,1	Net	0	survived	0	survived
48002	H. hucho	34,4	Turbine & Screen	5	dead	NA	NA
48003	H. hucho	30,7	Turbine & Screen	5	dead	NA	NA
48004	H. hucho	34,6	Turbine & Screen	5	dead	NA	NA
48005	H. hucho	36,0	Turbine & Screen	5	dead	NA	NA
48006	H. hucho	36,3	Turbine & Screen	5	dead	NA	NA
27812	H. hucho	34,8	Net	0	survived	NA	NA
28889	H. hucho	32,3	Turbine & Screen	5	dead	NA	NA
38383	H. hucho	14,2	Turbine & Screen	0	survived	0	survived
38384	H. hucho	15,8	Turbine & Screen	0	survived	0	survived
38503	H. hucho	12,1	Turbine & Screen	0	survived	NA	NA
38504	H. hucho	16,1	Turbine & Screen	0	survived	NA	NA
38583	H. hucho	14,8	Net	5	dead	NA	NA
38584	H. hucho	15,8	Net	5	dead	NA	NA
38521	H. hucho	15,1	Turbine & Screen	5	dead	NA	NA
38522	H. hucho	15,6	Turbine & Screen	5	dead	NA	NA
38523	H. hucho	13,7	Turbine & Screen	5	dead	NA	NA
38524	H. hucho	16,1	Turbine & Screen	5	dead	NA	NA
38525	H. hucho	14,1	Turbine & Screen	5	dead	NA	NA
28809	H. hucho	34,3	Turbine & Screen	0	survived	NA	NA
28810	H. hucho	35,0	Turbine & Screen	0	survived	NA	NA
27770	H. hucho	15,7	Net	0	survived	0	survived
52206	H. hucho	15,1	Net	0	survived	0	survived
27772	H. hucho	14,5	Net	0	survived	0	survived
27773	H. hucho	13,8	Net	0	survived	5	dead
27387	R. rutilus	13,0	Predamage	0	survived	0	survived
38401	H. hucho	15,5	Net	0	survived	0	survived
38526	H. hucho	16,1	Turbine & Screen	5	dead	NA	NA
38527	H. hucho	10,6	Turbine & Screen	5	dead	NA	NA
38528	H. hucho	14,7	Turbine & Screen	5	dead	NA	NA
38529	H. hucho	16,1	Turbine & Screen	5	dead	NA	NA
38530	H. hucho	14,3	Turbine & Screen	5	dead	NA	NA
48073	H. hucho	16,2	Turbine & Screen	0	survived	0	survived
52193	H. hucho	14,1	Turbine & Screen	0	survived	5	dead
28813	H. hucho	13,8	Turbine & Screen	5	dead	NA	NA
28814	H. hucho	12,5	Turbine & Screen	5	dead	NA	NA
28815	H. hucho	14,9	Turbine & Screen	5	dead	NA	NA
28816	H. hucho	15,8	Turbine & Screen	5	dead	NA	NA
28817	H. hucho	15,1	Turbine & Screen	5	dead	NA	NA
48031	H. hucho	15,0	Turbine & Screen	5	dead	NA	NA
48032	H. hucho	15,2	Turbine & Screen	5	dead	NA	NA
48033	H. hucho	16,0	Turbine & Screen	5	dead	NA	NA
48001	H. hucho	31,9	Turbine & Screen	5	dead	NA	NA
28819	H. hucho	14,9	Turbine & Screen	5	dead	NA	NA
28820	H. hucho	12,1	Turbine & Screen	5	dead	NA	NA
28821	H. hucho	12,9	Turbine & Screen	5	dead	NA	NA
52197	H. hucho	15,5	Turbine & Screen	0	survived	0	survived
28822	H. hucho	10,1	Turbine & Screen	5	dead	NA	NA
28823	H. hucho	14,8	Turbine & Screen	0	survived	NA	NA
28824	H. hucho	13,6	Turbine & Screen	0	survived	NA	NA
28825	H. hucho	11,6	Turbine & Screen	0	survived	NA	NA
52161	H. hucho	16,3	Turbine & Screen	0	survived	0	survived
48010	H. hucho	15,6	Turbine & Screen	0	survived	5	dead
52201	H. hucho	14,5	Turbine & Screen	5	dead	NA	NA
52202	H. hucho	16,6	Turbine & Screen	0	survived	0	survived
28869	H. hucho	13,5	Turbine & Screen	5	dead	NA	NA
28870	H. hucho	16,9	Turbine & Screen	5	dead	NA	NA
28871	H. hucho	16,6	Turbine & Screen	5	dead	NA	NA
28872	H. hucho	15,4	Turbine & Screen	5	dead	NA	NA
28873	H. hucho	15,7	Turbine & Screen	5	dead	NA	NA
28874	H. hucho	15,1	Turbine & Screen	5	dead	NA	NA
28875	H. hucho	14,0	Turbine & Screen	5	dead	NA	NA
28876	H. hucho	13,5	Turbine & Screen	5	dead	NA	NA
28877	H. hucho	14,5	Turbine & Screen	5	dead	NA	NA
28878	H. hucho	15,4	Turbine & Screen	5	dead	NA	NA
28879	H. hucho	15,4	Turbine & Screen	5	dead	NA	NA
38395	H. hucho	13,2	Turbine & Screen	5	dead	NA	NA
38396	H. hucho	15,3	Turbine & Screen	5	dead	NA	NA
27830	H. hucho	31,3	Turbine & Screen	5	dead	NA	NA
52171	H. hucho	33,0	Turbine & Screen	0	survived	NA	NA
28890	H. hucho	14,4	Net	5	dead	NA	NA
28891	H. hucho	16,9	Net	0	survived	NA	NA
28892	H. hucho	15,4	Net	0	survived	NA	NA
28893	H. hucho	14,9	Net	5	dead	NA	NA
28894	H. hucho	15,9	Net	0	survived	0	survived
28895	H. hucho	15,5	Net	0	survived	0	survived
38423	H. hucho	16,2	Net	0	survived	5	dead
48075	H. hucho	36,4	Net	0	survived	NA	NA
48076	H. hucho	33,4	Net	0	survived	NA	NA
52065	H. hucho	44,1	Net	0	survived	NA	NA
27398	R. rutilus	14,7	Predamage	0	survived	0	survived
52170	H. hucho	15,1	Turbine & Screen	5	dead	NA	NA
27390	R. rutilus	11,3	Predamage	0	survived	0	survived
48141	H. hucho	15,8	Turbine & Screen	5	dead	NA	NA
35012	R. rutilus	14,0	Predamage	0	survived	0	survived
35021	R. rutilus	11,3	Predamage	0	survived	0	survived
35031	R. rutilus	13,9	Predamage	0	survived	5	dead
45683	R. rutilus	13,7	Predamage	0	survived	NA	NA
45684	R. rutilus	11,4	Predamage	0	survived	NA	NA
45685	R. rutilus	15,3	Predamage	0	survived	NA	NA
45687	R. rutilus	16,4	Predamage	0	survived	NA	NA
35032	R. rutilus	11,5	Turbine & Screen	5	dead	NA	NA
48148	H. hucho	14,6	Turbine & Screen	5	dead	NA	NA
48151	H. hucho	14,3	Turbine & Screen	5	dead	NA	NA
48152	H. hucho	16,0	Turbine & Screen	5	dead	NA	NA
48153	H. hucho	14,3	Turbine & Screen	5	dead	NA	NA
48155	H. hucho	14,6	Turbine & Screen	5	dead	NA	NA
38505	H. hucho	16,9	Turbine & Screen	5	dead	NA	NA
38506	H. hucho	17,2	Turbine & Screen	5	dead	NA	NA
38507	H. hucho	13,1	Turbine & Screen	5	dead	NA	NA
27731	H. hucho	12,9	Turbine & Screen	0	survived	0	survived
57061	P. fluviatilis	11,7	Net	0	survived	NA	NA
57062	P. fluviatilis	9,9	Net	0	survived	NA	NA
59007	P. fluviatilis	10,8	Predamage	0	survived	0	survived
59262	P. fluviatilis	10,7	Predamage	0	survived	NA	NA
59142	P. fluviatilis	12,2	Turbine & Screen	5	dead	NA	NA
59263	P. fluviatilis	10,1	Predamage	0	survived	NA	NA
59264	P. fluviatilis	10,8	Predamage	0	survived	NA	NA
59265	P. fluviatilis	12,6	Predamage	0	survived	NA	NA
59266	P. fluviatilis	9,2	Predamage	0	survived	NA	NA
60003	P. fluviatilis	10,9	Predamage	0	survived	0	survived
59143	P. fluviatilis	9,7	Turbine & Screen	5	dead	NA	NA
59144	P. fluviatilis	11,8	Turbine & Screen	5	dead	NA	NA
59145	P. fluviatilis	10,3	Turbine & Screen	5	dead	NA	NA
59146	P. fluviatilis	11,3	Turbine & Screen	5	dead	NA	NA
59147	P. fluviatilis	6,1	Turbine & Screen	5	dead	NA	NA
57058	P. fluviatilis	11,3	Net	0	survived	NA	NA
57059	P. fluviatilis	11,9	Net	0	survived	NA	NA
57073	P. fluviatilis	12,0	Net	0	survived	0	survived
57057	P. fluviatilis	11,5	Net	0	survived	NA	NA
60011	P. fluviatilis	10,5	Predamage	0	survived	0	survived
58186	P. fluviatilis	9,1	Predamage	0	survived	0	survived
57076	P. fluviatilis	12,9	Net	0	survived	0	survived
57081	P. fluviatilis	11,6	Net	0	survived	0	survived
58188	P. fluviatilis	9,5	Predamage	0	survived	0	survived
57088	P. fluviatilis	8,9	Net	0	survived	5	dead
57005	P. fluviatilis	11,3	Predamage	0	survived	0	survived
58051	P. fluviatilis	11,4	Net	0	survived	0	survived
58059	P. fluviatilis	11,4	Net	0	survived	0	survived
60016	P. fluviatilis	11,6	Net	0	survived	5	dead
57229	P. fluviatilis	12,1	Predamage	0	survived	0	survived
58179	P. fluviatilis	10,2	Predamage	0	survived	0	survived
57233	P. fluviatilis	11,6	Predamage	0	survived	0	survived
59127	P. fluviatilis	11,2	Predamage	0	survived	NA	NA
59128	P. fluviatilis	11,0	Predamage	0	survived	NA	NA
59129	P. fluviatilis	10,8	Predamage	0	survived	NA	NA
59130	P. fluviatilis	10,2	Predamage	0	survived	NA	NA
59131	P. fluviatilis	10,3	Predamage	0	survived	NA	NA
59109	P. fluviatilis	11,5	Net	0	survived	5	dead
59110	P. fluviatilis	8,6	Net	0	survived	5	dead
59113	P. fluviatilis	11,5	Net	0	survived	5	dead
59001	P. fluviatilis	11,2	Predamage	0	survived	0	survived
58023	P. fluviatilis	9,6	Turbine & Screen	1	survived	5	dead
59272	P. fluviatilis	10,4	Turbine & Screen	0	survived	0	survived
57099	P. fluviatilis	12,1	Net	0	survived	5	dead
59275	P. fluviatilis	9,9	Turbine & Screen	0	survived	0	survived
59277	P. fluviatilis	10,3	Turbine & Screen	5	dead	NA	NA
59276	P. fluviatilis	10,3	Turbine & Screen	5	dead	NA	NA
57022	P. fluviatilis	12,8	Turbine & Screen	1	survived	5	dead
59278	P. fluviatilis	6,7	Turbine & Screen	5	dead	NA	NA
57173	P. fluviatilis	11,4	Turbine & Screen	0	survived	NA	NA
57174	P. fluviatilis	9,9	Turbine & Screen	0	survived	NA	NA
57175	P. fluviatilis	11,2	Turbine & Screen	0	survived	NA	NA
57176	P. fluviatilis	11,4	Turbine & Screen	0	survived	NA	NA
57031	P. fluviatilis	9,7	Turbine & Screen	0	survived	5	dead
57177	P. fluviatilis	10,4	Turbine & Screen	0	survived	NA	NA
57188	P. fluviatilis	10,4	Turbine & Screen	5	dead	NA	NA
57189	P. fluviatilis	11,1	Turbine & Screen	5	dead	NA	NA
57190	P. fluviatilis	10,0	Turbine & Screen	5	dead	NA	NA
57191	P. fluviatilis	9,6	Turbine & Screen	5	dead	NA	NA
57192	P. fluviatilis	12,3	Turbine & Screen	5	dead	NA	NA
57193	P. fluviatilis	12,1	Turbine & Screen	5	dead	NA	NA
57194	P. fluviatilis	11,0	Turbine & Screen	5	dead	NA	NA
57195	P. fluviatilis	11,3	Turbine & Screen	5	dead	NA	NA
57196	P. fluviatilis	9,9	Turbine & Screen	5	dead	NA	NA
57182	P. fluviatilis	10,5	Turbine & Screen	0	survived	0	survived
57052	P. fluviatilis	8,6	Turbine & Screen	5	dead	NA	NA
57053	P. fluviatilis	9,6	Turbine & Screen	5	dead	NA	NA
57054	P. fluviatilis	10,3	Turbine & Screen	5	dead	NA	NA
57055	P. fluviatilis	11,9	Turbine & Screen	5	dead	NA	NA
57056	P. fluviatilis	8,8	Turbine & Screen	5	dead	NA	NA
58044	P. fluviatilis	11,7	Turbine & Screen	5	dead	NA	NA
58045	P. fluviatilis	12,8	Turbine & Screen	5	dead	NA	NA
57021	P. fluviatilis	11,6	Turbine & Screen	0	survived	NA	NA
57023	P. fluviatilis	9,9	Turbine & Screen	0	survived	NA	NA
57024	P. fluviatilis	10,6	Turbine & Screen	0	survived	NA	NA
57027	P. fluviatilis	12,0	Turbine & Screen	0	survived	NA	NA
57030	P. fluviatilis	10,2	Turbine & Screen	0	survived	NA	NA
57051	P. fluviatilis	12,0	Turbine & Screen	5	dead	NA	NA
57092	P. fluviatilis	12,4	Turbine & Screen	1	survived	1	survived
57096	P. fluviatilis	12,4	Turbine & Screen	5	dead	NA	NA
57184	P. fluviatilis	11,5	Turbine & Screen	0	survived	0	survived
57185	P. fluviatilis	10,9	Turbine & Screen	0	survived	0	survived
59017	P. fluviatilis	10,7	Turbine & Screen	0	survived	0	survived
59024	P. fluviatilis	10,4	Turbine & Screen	0	survived	0	survived
60202	P. fluviatilis	11,6	Predamage	0	survived	0	survived
59045	P. fluviatilis	12,2	Turbine & Screen	0	survived	0	survived
59049	P. fluviatilis	12	Turbine & Screen	0	survived	0	survived
59072	P. fluviatilis	10,8	Turbine & Screen	5	dead	NA	NA
59073	P. fluviatilis	11,0	Turbine & Screen	5	dead	NA	NA
59074	P. fluviatilis	12,2	Turbine & Screen	5	dead	NA	NA
59075	P. fluviatilis	10,9	Turbine & Screen	5	dead	NA	NA
59076	P. fluviatilis	10,2	Turbine & Screen	5	dead	NA	NA
59077	P. fluviatilis	11,3	Turbine & Screen	5	dead	NA	NA
59078	P. fluviatilis	10,4	Turbine & Screen	5	dead	NA	NA
59079	P. fluviatilis	11,6	Turbine & Screen	5	dead	NA	NA
59080	P. fluviatilis	12	Turbine & Screen	5	dead	NA	NA
57113	P. fluviatilis	11,6	Turbine & Screen	5	dead	NA	NA
57119	P. fluviatilis	9,9	Turbine & Screen	0	survived	5	dead
59306	P. fluviatilis	10,9	Turbine & Screen	5	dead	NA	NA
59307	P. fluviatilis	9,9	Turbine & Screen	5	dead	NA	NA
59308	P. fluviatilis	10,0	Turbine & Screen	5	dead	NA	NA
59309	P. fluviatilis	12,5	Turbine & Screen	5	dead	NA	NA
59310	P. fluviatilis	10,5	Turbine & Screen	5	dead	NA	NA
59311	P. fluviatilis	10,3	Turbine & Screen	5	dead	NA	NA
59312	P. fluviatilis	10,4	Turbine & Screen	5	dead	NA	NA
59313	P. fluviatilis	11	Turbine & Screen	5	dead	NA	NA
59314	P. fluviatilis	11,7	Turbine & Screen	5	dead	NA	NA
59315	P. fluviatilis	11,5	Turbine & Screen	5	dead	NA	NA
59316	P. fluviatilis	11,4	Turbine & Screen	5	dead	NA	NA
59317	P. fluviatilis	10,4	Turbine & Screen	5	dead	NA	NA
59318	P. fluviatilis	9,3	Turbine & Screen	0	survived	5	dead
57136	P. fluviatilis	8,1	Turbine & Screen	0	survived	5	dead
60040	P. fluviatilis	8,2	Turbine & Screen	0	survived	5	dead
60041	P. fluviatilis	10,3	Turbine & Screen	0	survived	5	dead
60043	P. fluviatilis	11,0	Turbine & Screen	0	survived	5	dead
60055	P. fluviatilis	11,3	Turbine & Screen	0	survived	5	dead
60271	P. fluviatilis	11,1	Turbine & Screen	5	dead	NA	NA
59343	P. fluviatilis	9,0	Turbine & Screen	5	dead	NA	NA
59344	P. fluviatilis	10,0	Turbine & Screen	5	dead	NA	NA
59355	P. fluviatilis	11,9	Turbine & Screen	5	dead	NA	NA
59356	P. fluviatilis	12,2	Turbine & Screen	5	dead	NA	NA
59357	P. fluviatilis	10,7	Turbine & Screen	5	dead	NA	NA
59358	P. fluviatilis	10,0	Turbine & Screen	5	dead	NA	NA
59359	P. fluviatilis	8,0	Turbine & Screen	5	dead	NA	NA
59360	P. fluviatilis	11,5	Turbine & Screen	5	dead	NA	NA
57123	P. fluviatilis	10,4	Turbine & Screen	5	dead	NA	NA
60019	P. fluviatilis	10,1	Turbine & Screen	5	dead	NA	NA
60020	P. fluviatilis	11,2	Turbine & Screen	5	dead	NA	NA
60021	P. fluviatilis	7,8	Turbine & Screen	5	dead	NA	NA
60022	P. fluviatilis	10,3	Turbine & Screen	5	dead	NA	NA
60023	P. fluviatilis	12,6	Turbine & Screen	5	dead	NA	NA
60024	P. fluviatilis	12,4	Turbine & Screen	5	dead	NA	NA
60025	P. fluviatilis	12,7	Turbine & Screen	5	dead	NA	NA
60028	P. fluviatilis	10,5	Turbine & Screen	5	dead	NA	NA
60027	P. fluviatilis	9,4	Turbine & Screen	5	dead	NA	NA
60026	P. fluviatilis	11,9	Turbine & Screen	5	dead	NA	NA
60030	P. fluviatilis	10,0	Turbine & Screen	5	dead	NA	NA
59361	P. fluviatilis	5,4	Turbine & Screen	5	dead	NA	NA
57220	P. fluviatilis	11,5	Turbine & Screen	5	dead	NA	NA
57221	P. fluviatilis	10,9	Turbine & Screen	5	dead	NA	NA
57222	P. fluviatilis	10,8	Turbine & Screen	5	dead	NA	NA
57223	P. fluviatilis	10,3	Turbine & Screen	5	dead	NA	NA
57224	P. fluviatilis	10,0	Turbine & Screen	5	dead	0	survived
57225	P. fluviatilis	10,0	Turbine & Screen	5	dead	NA	NA
60274	P. fluviatilis	9,2	Turbine & Screen	5	dead	NA	NA
60275	P. fluviatilis	8,6	Turbine & Screen	5	dead	NA	NA
60276	P. fluviatilis	8,9	Turbine & Screen	5	dead	NA	NA
60277	P. fluviatilis	10,8	Turbine & Screen	5	dead	NA	NA
60278	P. fluviatilis	9,7	Turbine & Screen	5	dead	NA	NA
60279	P. fluviatilis	13,0	Turbine & Screen	5	dead	NA	NA
60280	P. fluviatilis	10,0	Turbine & Screen	5	dead	NA	NA
60281	P. fluviatilis	12,0	Turbine & Screen	5	dead	NA	NA
60282	P. fluviatilis	10,2	Turbine & Screen	5	dead	NA	NA
60283	P. fluviatilis	11,5	Turbine & Screen	5	dead	NA	NA
58173	P. fluviatilis	11,3	Turbine & Screen	5	dead	NA	NA
58161	P. fluviatilis	12,9	Turbine & Screen	5	dead	NA	NA
57288	P. fluviatilis	9,9	Turbine & Screen	3	survived	5	dead
60392	P. fluviatilis	11,5	Turbine & Screen	5	dead	NA	NA
34814	T. thymallus	19,2	Predamage	0	survived	NA	NA
34812	T. thymallus	8,9	Predamage	0	survived	0	survived
36181	T. thymallus	9,6	Predamage	0	survived	0	survived
37733	T. thymallus	9,7	Predamage	0	survived	0	survived
37737	T. thymallus	15,8	Predamage	0	survived	0	survived
23409	T. thymallus	17,4	Turbine & Screen	0	survived	0	survived
58274	P. fluviatilis	9,6	Turbine & Screen	5	dead	NA	NA
58275	P. fluviatilis	10,3	Turbine & Screen	5	dead	NA	NA
60401	P. fluviatilis	12,1	Turbine & Screen	5	dead	NA	NA
48548	A. anguilla	38,0	Predamage	0	survived	NA	NA
48549	A. anguilla	42,6	Predamage	0	survived	NA	NA
60331	P. fluviatilis	11,0	Turbine & Screen	5	dead	NA	NA
60332	P. fluviatilis	12,0	Turbine & Screen	5	dead	NA	NA
60333	P. fluviatilis	10,8	Turbine & Screen	5	dead	NA	NA
60334	P. fluviatilis	12,2	Turbine & Screen	5	dead	NA	NA
60335	P. fluviatilis	11,0	Turbine & Screen	5	dead	NA	NA
60337	P. fluviatilis	10,4	Turbine & Screen	5	dead	NA	NA
60338	P. fluviatilis	11,3	Turbine & Screen	5	dead	NA	NA
60339	P. fluviatilis	11,7	Turbine & Screen	5	dead	NA	NA
60340	P. fluviatilis	11,2	Turbine & Screen	5	dead	NA	NA
60341	P. fluviatilis	10,6	Turbine & Screen	5	dead	NA	NA
53131	A. anguilla	33,5	Net	0	survived	0	survived
53133	A. anguilla	49,4	Net	0	survived	0	survived
60229	P. fluviatilis	10,3	Net	0	survived	0	survived
37641	T. thymallus	7,2	Predamage	0	survived	0	survived
48547	A. anguilla	38,6	Predamage	0	survived	NA	NA
48550	A. anguilla	52,0	Predamage	0	survived	NA	NA
48546	A. anguilla	40,3	Predamage	0	survived	NA	NA
60336	P. fluviatilis	10,0	Turbine & Screen	5	dead	NA	NA
60342	P. fluviatilis	10,7	Turbine & Screen	5	dead	NA	NA
60343	P. fluviatilis	11,4	Turbine & Screen	5	dead	NA	NA
60344	P. fluviatilis	9,4	Turbine & Screen	5	dead	NA	NA
60345	P. fluviatilis	10,0	Turbine & Screen	5	dead	NA	NA
23385	T. thymallus	28	Predamage	0	survived	0	survived
60346	P. fluviatilis	7,6	Turbine & Screen	5	dead	NA	NA
60347	P. fluviatilis	10,9	Turbine & Screen	5	dead	NA	NA
60348	P. fluviatilis	10,1	Turbine & Screen	5	dead	NA	NA
60349	P. fluviatilis	9,6	Turbine & Screen	5	dead	NA	NA
60350	P. fluviatilis	8,8	Turbine & Screen	5	dead	NA	NA
60233	P. fluviatilis	10,3	Net	0	survived	0	survived
60237	P. fluviatilis	10,2	Net	0	survived	0	survived
56057	A. anguilla	38,4	Turbine & Screen	5	dead	NA	NA
60351	P. fluviatilis	10	Turbine & Screen	5	dead	NA	NA
60352	P. fluviatilis	9,2	Turbine & Screen	5	dead	NA	NA
60353	P. fluviatilis	11,0	Turbine & Screen	5	dead	NA	NA
60354	P. fluviatilis	11,2	Turbine & Screen	5	dead	NA	NA
60355	P. fluviatilis	11,1	Turbine & Screen	5	dead	NA	NA
56054	A. anguilla	37,5	Turbine & Screen	5	dead	NA	NA
53140	A. anguilla	37,4	Net	0	survived	0	survived
60244	P. fluviatilis	9,6	Net	0	survived	0	survived
60245	P. fluviatilis	11,4	Net	0	survived	0	survived
60249	P. fluviatilis	9,8	Net	0	survived	NA	NA
60250	P. fluviatilis	9,8	Net	0	survived	NA	NA
60251	P. fluviatilis	9,8	Net	0	survived	NA	NA
60252	P. fluviatilis	9,2	Net	0	survived	NA	NA
60253	P. fluviatilis	9,6	Net	0	survived	NA	NA
15689	S. trutta	16,8	Turbine & Screen	5	dead	NA	NA
15690	S. trutta	15,5	Turbine & Screen	5	dead	NA	NA
60356	P. fluviatilis	11	Turbine & Screen	5	dead	NA	NA
60357	P. fluviatilis	11,6	Turbine & Screen	5	dead	NA	NA
60358	P. fluviatilis	10,8	Turbine & Screen	5	dead	0	survived
60359	P. fluviatilis	10	Turbine & Screen	5	dead	NA	NA
60360	P. fluviatilis	9,8	Turbine & Screen	5	dead	NA	NA
56205	A. anguilla	38,8	Predamage	0	survived	0	survived
60361	P. fluviatilis	8,0	Turbine & Screen	5	dead	NA	NA
60362	P. fluviatilis	8,0	Turbine & Screen	5	dead	NA	NA
58222	P. fluviatilis	12,1	Turbine & Screen	5	dead	NA	NA
23417	T. thymallus	26,3	Turbine & Screen	5	dead	NA	NA
23418	T. thymallus	13,5	Turbine & Screen	5	dead	NA	NA
23419	T. thymallus	8,4	Turbine & Screen	5	dead	NA	NA
23420	T. thymallus	9,1	Turbine & Screen	5	dead	NA	NA
53152	A. anguilla	49,4	Net	0	survived	NA	NA
53153	A. anguilla	54,3	Net	0	survived	NA	NA
36053	T. thymallus	12,9	Turbine & Screen	5	dead	NA	NA
36054	T. thymallus	9,3	Turbine & Screen	5	dead	NA	NA
36055	T. thymallus	10,9	Turbine & Screen	5	dead	NA	NA
23421	T. thymallus	7,8	Turbine & Screen	5	dead	NA	NA
34895	T. thymallus	23,4	Turbine & Screen	5	dead	NA	NA
34897	T. thymallus	17,3	Turbine & Screen	5	dead	NA	NA
34898	T. thymallus	9,5	Turbine & Screen	5	dead	NA	NA
34865	T. thymallus	26,5	Net	1	survived	5	dead
48607	A. anguilla	37,6	Predamage	0	survived	0	survived
34892	T. thymallus	9,5	Net	0	survived	0	survived
56173	A. anguilla	35,8	Net	0	survived	NA	NA
56174	A. anguilla	35,2	Net	0	survived	NA	NA
53179	A. anguilla	30,1	Turbine & Screen	5	dead	NA	NA
37806	T. thymallus	8,7	Turbine & Screen	5	dead	NA	NA
23427	T. thymallus	10	Turbine & Screen	1	survived	0	survived
53384	A. anguilla	36,2	Predamage	0	survived	0	survived
53386	A. anguilla	34,7	Predamage	0	survived	0	survived
34900	T. thymallus	11	Turbine & Screen	5	dead	NA	NA
34901	T. thymallus	10,3	Turbine & Screen	5	dead	NA	NA
34902	T. thymallus	11,3	Turbine & Screen	5	dead	NA	NA
58150	P. fluviatilis	11,1	Net	0	survived	0	survived
23424	T. thymallus	14,8	Turbine & Screen	5	dead	NA	NA
48387	A. anguilla	46,7	Net	0	survived	NA	NA
48389	A. anguilla	39,4	Net	0	survived	NA	NA
48431	A. anguilla	55	Turbine & Screen	5	dead	NA	NA
48432	A. anguilla	63	Turbine & Screen	5	dead	NA	NA
48433	A. anguilla	37	Turbine & Screen	5	dead	NA	NA
48434	A. anguilla	60	Turbine & Screen	5	dead	NA	NA
48435	A. anguilla	40	Turbine & Screen	5	dead	NA	NA
36233	T. thymallus	9,9	Turbine & Screen	0	survived	NA	NA
36235	T. thymallus	8,9	Turbine & Screen	0	survived	0	survived
34908	T. thymallus	8,7	Turbine & Screen	5	dead	NA	NA
34910	T. thymallus	16,8	Turbine & Screen	5	dead	NA	NA
34911	T. thymallus	24,6	Turbine & Screen	5	dead	NA	NA
34912	T. thymallus	14,7	Turbine & Screen	5	dead	NA	NA
34913	T. thymallus	9,1	Turbine & Screen	5	dead	NA	NA
34914	T. thymallus	17,1	Turbine & Screen	0	survived	NA	NA
56185	A. anguilla	43,5	Net	0	survived	NA	NA
48574	A. anguilla	41,9	Net	0	survived	NA	NA
48575	A. anguilla	51	Net	0	survived	NA	NA
48391	A. anguilla	35,8	Net	0	survived	NA	NA
48392	A. anguilla	33,1	Net	0	survived	0	survived
48394	A. anguilla	51,5	Net	0	survived	0	survived
55333	A. anguilla	36,0	Predamage	0	survived	0	survived
23390	T. thymallus	10,5	Turbine & Screen	5	dead	NA	NA
48436	A. anguilla	53	Turbine & Screen	5	dead	NA	NA
48437	A. anguilla	58	Turbine & Screen	5	dead	NA	NA
48438	A. anguilla	65	Turbine & Screen	5	dead	NA	NA
56156	A. anguilla	50,2	Predamage	0	survived	0	survived
56068	A. anguilla	35	Net	5	dead	NA	NA
56157	A. anguilla	53,8	Predamage	0	survived	0	survived
48551	A. anguilla	39,7	Turbine & Screen	0	survived	NA	NA
48552	A. anguilla	32,6	Turbine & Screen	0	survived	NA	NA
48553	A. anguilla	41,6	Turbine & Screen	0	survived	0	survived
48562	A. anguilla	35,7	Turbine & Screen	5	dead	NA	NA
48559	A. anguilla	39,2	Turbine & Screen	0	survived	0	survived
37753	T. thymallus	20	Turbine & Screen	5	dead	NA	NA
37754	T. thymallus	25,3	Turbine & Screen	5	dead	NA	NA
37755	T. thymallus	21,6	Turbine & Screen	5	dead	NA	NA
37756	T. thymallus	19	Turbine & Screen	5	dead	NA	NA
16868	S. trutta	5,4	Predamage	0	survived	0	survived
16869	S. trutta	5,6	Predamage	0	survived	0	survived
16870	S. trutta	5,2	Predamage	0	survived	0	survived
16871	S. trutta	4,9	Predamage	0	survived	0	survived
37757	T. thymallus	15,2	Turbine & Screen	5	dead	NA	NA
37758	T. thymallus	14,7	Turbine & Screen	5	dead	NA	NA
36195	T. thymallus	6,5	Turbine & Screen	5	dead	NA	NA
36196	T. thymallus	10	Turbine & Screen	5	dead	NA	NA
48439	A. anguilla	30,1	Net	0	survived	NA	NA
56166	A. anguilla	38,2	Turbine & Screen	5	dead	NA	NA
56167	A. anguilla	37,0	Turbine & Screen	5	dead	NA	NA
56168	A. anguilla	48,3	Turbine & Screen	5	dead	NA	NA
56169	A. anguilla	48,3	Turbine & Screen	5	dead	NA	NA
36226	T. thymallus	10,1	Turbine & Screen	0	survived	0	survived
48440	A. anguilla	37,8	Net	0	survived	NA	NA
48441	A. anguilla	40	Net	0	survived	NA	NA
53282	A. anguilla	48,5	Net	0	survived	NA	NA
53283	A. anguilla	59,5	Net	0	survived	NA	NA
53329	A. anguilla	37,5	Turbine & Screen	0	survived	0	survived
53333	A. anguilla	39,1	Turbine & Screen	0	survived	0	survived
37773	T. thymallus	21,2	Net	0	survived	0	survived
53345	A. anguilla	33,3	Turbine & Screen	5	dead	NA	NA
36197	T. thymallus	9,8	Turbine & Screen	5	dead	NA	NA
36198	T. thymallus	9,7	Turbine & Screen	5	dead	NA	NA
36199	T. thymallus	9,9	Turbine & Screen	5	dead	NA	NA
36200	T. thymallus	9,5	Turbine & Screen	5	dead	NA	NA
53346	A. anguilla	40,0	Turbine & Screen	5	dead	NA	NA
55266	A. anguilla	35	Turbine & Screen	5	dead	NA	NA
55267	A. anguilla	43	Turbine & Screen	0	survived	0	survived
36201	T. thymallus	10,1	Turbine & Screen	5	dead	NA	NA
36202	T. thymallus	9,4	Turbine & Screen	5	dead	NA	NA
36203	T. thymallus	10	Turbine & Screen	5	dead	NA	NA
36204	T. thymallus	8,5	Turbine & Screen	5	dead	NA	NA
36206	T. thymallus	11	Turbine & Screen	5	dead	NA	NA
55276	A. anguilla	40,2	Turbine & Screen	0	survived	0	survived
34745	T. thymallus	9,7	Turbine & Screen	5	dead	NA	NA
37804	T. thymallus	17,1	Net	5	dead	NA	NA
23429	T. thymallus	19,9	Net	0	survived	0	survived
36222	T. thymallus	19,1	Turbine & Screen	5	dead	NA	NA
23291	T. thymallus	8,5	Turbine & Screen	5	dead	NA	NA
23292	T. thymallus	8,7	Turbine & Screen	5	dead	NA	NA
23289	T. thymallus	10,3	Turbine & Screen	5	dead	NA	NA
23290	T. thymallus	9,5	Turbine & Screen	5	dead	NA	NA
55379	A. anguilla	50,5	Net	0	survived	0	survived
55382	A. anguilla	46	Net	0	survived	0	survived
34836	T. thymallus	20,1	Net	3	survived	5	dead
53357	A. anguilla	55,5	Turbine & Screen	3	survived	5	dead
55313	A. anguilla	36	Turbine & Screen	5	dead	NA	NA
34833	T. thymallus	16,9	Net	0	survived	0	survived
55385	A. anguilla	39	Net	0	survived	0	survived
56197	A. anguilla	59	Turbine & Screen	5	dead	NA	NA
56198	A. anguilla	38,5	Turbine & Screen	5	dead	NA	NA
56199	A. anguilla	40,5	Turbine & Screen	5	dead	NA	NA
56200	A. anguilla	42,5	Turbine & Screen	5	dead	NA	NA
56201	A. anguilla	41	Turbine & Screen	5	dead	NA	NA
56202	A. anguilla	39,5	Turbine & Screen	5	dead	NA	NA
56203	A. anguilla	36	Turbine & Screen	5	dead	NA	NA
34862	T. thymallus	14,7	Turbine & Screen	5	dead	NA	NA
34863	T. thymallus	9	Turbine & Screen	5	dead	NA	NA
34864	T. thymallus	8	Turbine & Screen	5	dead	NA	NA
37779	T. thymallus	23,5	Turbine & Screen	0	survived	NA	NA
48604	A. anguilla	55,2	Turbine & Screen	5	dead	NA	NA
55394	A. anguilla	45,5	Net	0	survived	0	survived
37780	T. thymallus	18	Turbine & Screen	0	survived	NA	NA
37781	T. thymallus	14,5	Turbine & Screen	0	survived	NA	NA
37782	T. thymallus	10,8	Turbine & Screen	0	survived	NA	NA
37783	T. thymallus	25,6	Turbine & Screen	0	survived	NA	NA
37784	T. thymallus	19,1	Turbine & Screen	0	survived	0	survived
55399	A. anguilla	40	Net	0	survived	0	survived
37788	T. thymallus	15,1	Turbine & Screen	0	survived	5	dead
48459	A. anguilla	37,9	Net	0	survived	0	survived
48461	A. anguilla	38,8	Net	0	survived	0	survived
37649	T. thymallus	16,4	Predamage	0	survived	5	dead
34824	T. thymallus	20,8	Net	1	survived	0	survived
37646	T. thymallus	9,3	Predamage	0	survived	0	survived
37647	T. thymallus	9,4	Predamage	0	survived	0	survived
34622	T. thymallus	7,8	Predamage	0	survived	NA	NA
34620	T. thymallus	10,2	Predamage	0	survived	NA	NA
34887	T. thymallus	11,3	Net	5	dead	NA	NA
34885	T. thymallus	25	Net	0	survived	NA	NA
34886	T. thymallus	18,9	Net	0	survived	NA	NA
34883	T. thymallus	10,4	Net	0	survived	NA	NA
34884	T. thymallus	10,2	Net	0	survived	NA	NA
34882	T. thymallus	16,7	Net	0	survived	NA	NA
23515	T. thymallus	19,9	Turbine & Screen	5	dead	NA	NA
55238	A. anguilla	35,5	Predamage	0	survived	0	survived
55240	A. anguilla	32,5	Predamage	0	survived	NA	NA
55241	A. anguilla	39,5	Predamage	0	survived	NA	NA
55242	A. anguilla	35,5	Predamage	0	survived	NA	NA
55243	A. anguilla	39,5	Predamage	0	survived	NA	NA
55244	A. anguilla	54	Predamage	0	survived	NA	NA
34874	T. thymallus	14,9	Net	1	survived	0	survived
53221	A. anguilla	35,2	Predamage	0	survived	0	survived
53227	A. anguilla	56,6	Predamage	0	survived	0	survived
53230	A. anguilla	58,1	Predamage	0	survived	0	survived
36100	T. thymallus	19,5	Turbine & Screen	5	dead	NA	NA
56091	A. anguilla	38,8	Predamage	0	survived	0	survived
34621	T. thymallus	9,4	Predamage	0	survived	NA	NA
34628	T. thymallus	16,9	Predamage	0	survived	NA	NA
34629	T. thymallus	17,8	Predamage	0	survived	NA	NA
53094	A. anguilla	58,1	Turbine & Screen	0	survived	NA	NA
53095	A. anguilla	45,2	Turbine & Screen	0	survived	NA	NA
45696	R. rutilus	10,1	Turbine & Screen	0	survived	0	survived
53096	A. anguilla	30,6	Turbine & Screen	5	dead	NA	NA
53106	A. anguilla	41,8	Turbine & Screen	0	survived	0	survived
90037	B. Barbus	17,7	Predamage	0	survived	NA	NA
90038	B. Barbus	16,8	Predamage	0	survived	NA	NA
90039	B. Barbus	16,0	Predamage	0	survived	NA	NA
90040	B. Barbus	16,8	Predamage	0	survived	NA	NA
53119	A. anguilla	39,5	Turbine & Screen	0	survived	0	survived
90036	B. Barbus	16,6	Predamage	0	survived	NA	NA
90041	B. Barbus	9,0	Predamage	0	survived	NA	NA
90042	B. Barbus	8,5	Predamage	0	survived	NA	NA
55182	A. anguilla	44	Turbine & Screen	0	survived	0	survived
55170	A. anguilla	41,7	Turbine & Screen	5	dead	NA	NA
55171	A. anguilla	34,3	Turbine & Screen	5	dead	NA	NA
55172	A. anguilla	38,4	Turbine & Screen	5	dead	NA	NA
55173	A. anguilla	48,7	Turbine & Screen	0	survived	NA	NA
55174	A. anguilla	33,7	Turbine & Screen	0	survived	NA	NA
55175	A. anguilla	41	Turbine & Screen	0	survived	NA	NA
53124	A. anguilla	41	Turbine & Screen	1	survived	1	survived
53125	A. anguilla	54,2	Turbine & Screen	0	survived	0	survived
56022	A. anguilla	49,4	Turbine & Screen	3	survived	5	dead
56023	A. anguilla	61,1	Turbine & Screen	5	dead	NA	NA
56024	A. anguilla	50,4	Turbine & Screen	5	dead	NA	NA
56025	A. anguilla	49,8	Turbine & Screen	5	dead	NA	NA
48383	A. anguilla	34,9	Turbine & Screen	5	dead	NA	NA
56067	A. anguilla	40,5	Turbine & Screen	5	dead	NA	NA
49221	R. rutilus	5,7	Predamage	0	survived	NA	NA
49223	S. trutta	14,1	Predamage	0	survived	NA	NA
23454	T. thymallus	10	Net	5	dead	NA	NA
23455	T. thymallus	9,5	Net	5	dead	NA	NA
23457	T. thymallus	9	Net	5	dead	NA	NA
23468	T. thymallus	16,7	Net	0	survived	NA	NA
34988	T. thymallus	26,7	Net	0	survived	NA	NA
34632	T. thymallus	16,2	Predamage	0	survived	0	survived
45706	R. rutilus	11,9	Turbine & Screen	0	survived	0	survived
45707	R. rutilus	14,9	Turbine & Screen	0	survived	0	survived
36007	T. thymallus	15,4	Predamage	0	survived	0	survived
23357	R. rutilus	10,7	Net	0	survived	0	survived
34690	T. thymallus	9,2	Turbine & Screen	0	survived	0	survived
23306	T. thymallus	17,6	Turbine & Screen	5	dead	NA	NA
23307	T. thymallus	15,2	Turbine & Screen	5	dead	NA	NA
23308	T. thymallus	9,3	Turbine & Screen	5	dead	NA	NA
23309	T. thymallus	9	Turbine & Screen	5	dead	NA	NA
23310	T. thymallus	7,5	Turbine & Screen	5	dead	NA	NA
23312	T. thymallus	8,7	Turbine & Screen	5	dead	NA	NA
23313	T. thymallus	18,5	Turbine & Screen	0	survived	0	survived
23304	T. thymallus	7,1	Turbine & Screen	0	survived	NA	NA
23305	T. thymallus	9,3	Turbine & Screen	5	dead	NA	NA
23302	T. thymallus	10	Turbine & Screen	0	survived	NA	NA
23303	T. thymallus	8,3	Turbine & Screen	0	survived	NA	NA
23300	T. thymallus	9,2	Turbine & Screen	0	survived	NA	NA
23301	T. thymallus	9,1	Turbine & Screen	0	survived	NA	NA
23299	T. thymallus	9	Turbine & Screen	0	survived	NA	NA
36050	T. thymallus	12,3	Turbine & Screen	5	dead	NA	NA
23269	T. thymallus	7,9	Turbine & Screen	0	survived	0	survived
23266	T. thymallus	8,7	Turbine & Screen	0	survived	0	survived
37655	T. thymallus	18,3	Turbine & Screen	0	survived	0	survived
34641	T. thymallus	9,3	Net	0	survived	0	survived
34652	T. thymallus	9,7	Net	0	survived	0	survived
34653	T. thymallus	12,3	Net	0	survived	0	survived
34654	T. thymallus	9,4	Net	0	survived	NA	NA
34655	T. thymallus	10,4	Net	0	survived	NA	NA
34656	T. thymallus	13,7	Net	0	survived	NA	NA
34657	T. thymallus	10,2	Net	0	survived	NA	NA
37682	T. thymallus	17	Net	0	survived	0	survived
37704	T. thymallus	17,8	Net	0	survived	0	survived
45709	R. rutilus	12,5	Turbine & Screen	0	survived	0	survived
45720	R. rutilus	11,9	Turbine & Screen	0	survived	0	survived
35036	R. rutilus	15,2	Turbine & Screen	5	dead	NA	NA
35037	R. rutilus	6,6	Turbine & Screen	5	dead	NA	NA
35064	R. rutilus	14,8	Turbine & Screen	5	dead	NA	NA
35065	R. rutilus	17,9	Turbine & Screen	5	dead	NA	NA
35051	R. rutilus	11,4	Predamage	0	survived	5	dead
45740	R. rutilus	13,7	Predamage	0	survived	5	dead
35066	R. rutilus	13,4	Turbine & Screen	0	survived	NA	NA
35067	R. rutilus	16	Turbine & Screen	0	survived	NA	NA
45785	R. rutilus	11,1	Turbine & Screen	1	survived	5	dead
27665	R. rutilus	13	Turbine & Screen	5	dead	NA	NA
27671	R. rutilus	13,4	Turbine & Screen	5	dead	NA	NA
35388	R. rutilus	11,4	Turbine & Screen	5	dead	NA	NA
16882	S. trutta	14,8	Predamage	0	survived	5	dead
27519	R. rutilus	14,1	Predamage	0	survived	NA	NA
27520	R. rutilus	13,1	Predamage	0	survived	NA	NA
27522	R. rutilus	15,4	Predamage	0	survived	NA	NA
27523	R. rutilus	12,2	Predamage	0	survived	NA	NA
29833	R. rutilus	11,7	Predamage	0	survived	5	dead
27541	R. rutilus	11,9	Turbine & Screen	0	survived	NA	NA
27543	R. rutilus	11,8	Turbine & Screen	0	survived	NA	NA
27544	R. rutilus	13,9	Turbine & Screen	0	survived	NA	NA
29859	R. rutilus	12,7	Turbine & Screen	0	survived	0	survived
29867	R. rutilus	12,5	Turbine & Screen	0	survived	0	survived
29868	R. rutilus	14,3	Turbine & Screen	0	survived	0	survived
29870	R. rutilus	9,9	Turbine & Screen	0	survived	0	survived
29871	R. rutilus	14,8	Turbine & Screen	5	dead	NA	NA
29872	R. rutilus	15,2	Turbine & Screen	5	dead	NA	NA
29873	R. rutilus	12,9	Turbine & Screen	5	dead	NA	NA
29874	R. rutilus	11,3	Turbine & Screen	5	dead	NA	NA
29875	R. rutilus	18,4	Turbine & Screen	5	dead	NA	NA
29876	R. rutilus	14	Turbine & Screen	5	dead	NA	NA
29877	R. rutilus	12	Turbine & Screen	5	dead	NA	NA
29878	R. rutilus	11,5	Turbine & Screen	0	survived	NA	NA
27558	R. rutilus	11,7	Turbine & Screen	5	dead	NA	NA
27509	R. rutilus	10,8	Net	0	survived	0	survived
45900	R. rutilus	15,2	Net	0	survived	NA	NA
45902	R. rutilus	12,5	Net	0	survived	NA	NA
45903	R. rutilus	12,9	Net	0	survived	NA	NA
45904	R. rutilus	11,2	Net	0	survived	NA	NA
45917	R. rutilus	18,9	Net	0	survived	0	survived
29943	R. rutilus	9,8	Net	0	survived	5	dead
45919	R. rutilus	9,5	Turbine & Screen	1	survived	5	dead
45927	R. rutilus	11,2	Turbine & Screen	1	survived	5	dead
45928	R. rutilus	13,6	Turbine & Screen	3	survived	5	dead
35267	R. rutilus	12,4	Turbine & Screen	5	dead	NA	NA
35272	R. rutilus	17,2	Turbine & Screen	5	dead	NA	NA
35275	R. rutilus	9,6	Turbine & Screen	5	dead	NA	NA
35277	R. rutilus	13,3	Turbine & Screen	5	dead	NA	NA
27629	R. rutilus	13	Turbine & Screen	0	survived	5	dead
45944	R. rutilus	20,5	Turbine & Screen	5	dead	NA	NA
45986	R. rutilus	14,2	Turbine & Screen	0	survived	0	survived
45965	R. rutilus	12,4	Turbine & Screen	0	survived	0	survived
45968	R. rutilus	11,6	Turbine & Screen	0	survived	5	dead
17770	S. trutta	5,8	Turbine & Screen	0	survived	NA	NA
17771	S. trutta	17,5	Turbine & Screen	5	dead	NA	NA
29935	R. rutilus	14,2	Net	0	survived	0	survived
27574	R. rutilus	14,6	Net	0	survived	0	survived
27579	R. rutilus	11,4	Net	0	survived	5	dead
27599	R. rutilus	15,3	Net	0	survived	5	dead
27605	R. rutilus	11,9	Net	0	survived	5	dead
27619	R. rutilus	13,7	Net	0	survived	0	survived
35294	R. rutilus	19,5	Net	0	survived	5	dead
35295	R. rutilus	15,4	Net	0	survived	0	survived
35300	R. rutilus	15,7	Net	0	survived	5	dead
29899	R. rutilus	16,5	Net	0	survived	0	survived
49153	S. trutta	18,9	Turbine & Screen	0	survived	5	dead
17805	S. trutta	20,4	Turbine & Screen	5	dead	NA	NA
49220	S. trutta	5,1	Predamage	0	survived	NA	NA
49229	S. trutta	18,7	Predamage	0	survived	5	dead
16866	S. trutta	5,6	Predamage	0	survived	0	survived
17769	S. trutta	22,2	Turbine & Screen	0	survived	5	dead
17773	S. trutta	14,9	Turbine & Screen	5	dead	NA	NA
17774	S. trutta	15,4	Turbine & Screen	5	dead	NA	NA
17776	S. trutta	16,9	Turbine & Screen	0	survived	5	dead
17782	S. trutta	27,5	Net	0	survived	NA	NA
49240	S. trutta	18,2	Net	0	survived	5	dead
17790	S. trutta	18,8	Net	0	survived	5	dead
17794	S. trutta	27,2	Net	0	survived	5	dead
16846	S. trutta	18,8	Net	0	survived	0	survived
16847	S. trutta	17,8	Net	0	survived	0	survived
15760	S. trutta	17,2	Predamage	0	survived	0	survived
15762	S. trutta	17,4	Predamage	0	survived	5	dead
17575	S. trutta	12,9	Predamage	1	survived	0	survived
17578	S. trutta	17,3	Predamage	0	survived	0	survived
49005	S. trutta	21,6	Predamage	0	survived	0	survived
49029	S. trutta	5,8	Predamage	0	survived	NA	NA
49030	S. trutta	5,9	Predamage	0	survived	NA	NA
49049	S. trutta	18,3	Predamage	0	survived	NA	NA
49050	S. trutta	14,5	Predamage	0	survived	0	survived
49051	S. trutta	17,7	Predamage	0	survived	0	survived
49052	S. trutta	17,1	Predamage	0	survived	5	dead
49053	S. trutta	15,9	Predamage	0	survived	0	survived
49083	S. trutta	21,6	Predamage	0	survived	NA	NA
49126	S. trutta	15,6	Turbine & Screen	5	dead	NA	NA
49127	S. trutta	18	Turbine & Screen	5	dead	NA	NA
49132	S. trutta	19,2	Turbine & Screen	5	dead	NA	NA
49133	S. trutta	13,1	Turbine & Screen	5	dead	NA	NA
49103	S. trutta	18,9	Turbine & Screen	0	survived	0	survived
17618	S. trutta	18,6	Turbine & Screen	0	survived	5	dead
17622	S. trutta	18,4	Turbine & Screen	0	survived	0	survived
17623	S. trutta	16,1	Turbine & Screen	0	survived	0	survived
17628	S. trutta	17,2	Turbine & Screen	0	survived	5	dead
17631	S. trutta	14,4	Turbine & Screen	0	survived	0	survived
17638	S. trutta	14,1	Turbine & Screen	0	survived	0	survived
17645	S. trutta	14,9	Turbine & Screen	5	dead	NA	NA
15743	S. trutta	5,3	Turbine & Screen	0	survived	NA	NA
15744	S. trutta	5,7	Turbine & Screen	0	survived	NA	NA
49094	S. trutta	5,4	Turbine & Screen	5	dead	NA	NA
15737	S. trutta	18,2	Turbine & Screen	5	dead	NA	NA
15738	S. trutta	17,8	Turbine & Screen	5	dead	NA	NA
49086	S. trutta	19,1	Turbine & Screen	5	dead	NA	NA
16765	S. trutta	16,9	Turbine & Screen	5	dead	NA	NA
16766	S. trutta	16,8	Turbine & Screen	5	dead	NA	NA
16767	S. trutta	16,5	Turbine & Screen	5	dead	NA	NA
49081	S. trutta	6,1	Turbine & Screen	5	dead	NA	NA
49082	S. trutta	6,3	Turbine & Screen	5	dead	NA	NA
49079	S. trutta	4,9	Turbine & Screen	5	dead	NA	NA
49080	S. trutta	5,6	Turbine & Screen	5	dead	NA	NA
15709	S. trutta	33,5	Turbine & Screen	5	dead	NA	NA
49035	S. trutta	16,1	Turbine & Screen	5	dead	NA	NA
49033	S. trutta	20,7	Turbine & Screen	0	survived	NA	NA
49034	S. trutta	15,8	Turbine & Screen	0	survived	NA	NA
49031	S. trutta	5,6	Turbine & Screen	0	survived	NA	NA
49032	S. trutta	17,5	Turbine & Screen	0	survived	NA	NA
15685	S. trutta	11,9	Turbine & Screen	5	dead	NA	NA
15686	S. trutta	17,2	Turbine & Screen	5	dead	NA	NA
15683	S. trutta	15,5	Turbine & Screen	5	dead	NA	NA
15684	S. trutta	18,2	Turbine & Screen	5	dead	NA	NA
15680	S. trutta	21,7	Turbine & Screen	5	dead	NA	NA
15676	S. trutta	15,7	Turbine & Screen	0	survived	5	dead
16704	S. trutta	16,6	Turbine & Screen	5	dead	NA	NA
16705	S. trutta	18,5	Turbine & Screen	5	dead	NA	NA
16686	S. trutta	17,6	Turbine & Screen	1	survived	0	survived
16699	S. trutta	18,1	Turbine & Screen	0	survived	5	dead
17567	S. trutta	26,6	Turbine & Screen	3	survived	5	dead
15687	S. trutta	17,6	Turbine & Screen	5	dead	NA	NA
15688	S. trutta	14,8	Turbine & Screen	5	dead	NA	NA
49024	S. trutta	5,1	Turbine & Screen	5	dead	NA	NA
49023	S. trutta	5,4	Turbine & Screen	5	dead	NA	NA
17554	S. trutta	16,8	Turbine & Screen	0	survived	5	dead
49061	S. trutta	28,2	Net	0	survived	5	dead
49056	S. trutta	30,1	Net	0	survived	NA	NA
49057	S. trutta	19,6	Net	0	survived	NA	NA
49058	S. trutta	15,9	Net	0	survived	NA	NA
49059	S. trutta	27,9	Net	0	survived	NA	NA
49060	S. trutta	14,3	Net	0	survived	NA	NA
49078	S. trutta	17,4	Net	0	survived	0	survived
16724	S. trutta	20,1	Net	0	survived	0	survived
16725	S. trutta	17,5	Net	0	survived	5	dead
16734	S. trutta	18,3	Net	0	survived	0	survived
16738	S. trutta	15,4	Net	0	survived	0	survived
16742	S. trutta	16,2	Net	0	survived	0	survived
16745	S. trutta	17,3	Net	0	survived	NA	NA
17706	S. trutta	29,2	Predamage	5	dead	NA	NA
49163	S. trutta	15,1	Turbine & Screen	5	dead	NA	NA
49164	S. trutta	16,5	Turbine & Screen	5	dead	NA	NA
49165	S. trutta	19,2	Turbine & Screen	3	survived	5	dead
49187	S. trutta	5,3	Turbine & Screen	0	survived	NA	NA
49188	S. trutta	16,7	Turbine & Screen	0	survived	NA	NA
49189	S. trutta	18,6	Turbine & Screen	0	survived	NA	NA
49190	S. trutta	16,9	Turbine & Screen	0	survived	NA	NA
49191	S. trutta	16,7	Turbine & Screen	5	dead	NA	NA
49192	S. trutta	19,7	Turbine & Screen	5	dead	NA	NA
15876	S. trutta	15,4	Turbine & Screen	0	survived	0	survived
15882	S. trutta	16,2	Turbine & Screen	0	survived	5	dead
49207	S. trutta	15,7	Turbine & Screen	5	dead	NA	NA
49208	S. trutta	17,7	Turbine & Screen	5	dead	NA	NA
49209	S. trutta	19,5	Turbine & Screen	0	survived	5	dead
49212	S. trutta	18,9	Turbine & Screen	0	survived	5	dead
49214	S. trutta	16,1	Turbine & Screen	0	survived	5	dead
16855	S. trutta	14,3	Turbine & Screen	0	survived	0	survived
16856	S. trutta	17,6	Turbine & Screen	0	survived	0	survived
15894	S. trutta	17,8	Turbine & Screen	0	survived	0	survived
17723	S. trutta	18,4	Turbine & Screen	0	survived	5	dead
17724	S. trutta	11,4	Turbine & Screen	0	survived	0	survived
17726	S. trutta	18,3	Turbine & Screen	5	dead	NA	NA
17727	S. trutta	14,9	Turbine & Screen	5	dead	NA	NA
17729	S. trutta	16,6	Turbine & Screen	0	survived	5	dead
17730	S. trutta	18,9	Turbine & Screen	5	dead	NA	NA
17745	S. trutta	25,5	Turbine & Screen	0	survived	5	dead
49194	S. trutta	5,3	Net	0	survived	NA	NA
49195	S. trutta	14,3	Net	0	survived	NA	NA
49196	S. trutta	16,9	Net	0	survived	NA	NA
49197	S. trutta	13,1	Net	0	survived	NA	NA
49199	S. trutta	17,9	Net	0	survived	0	survived
49200	S. trutta	21,9	Net	0	survived	5	dead
49201	S. trutta	17,9	Net	0	survived	5	dead
49203	S. trutta	19,8	Net	0	survived	5	dead
17714	S. trutta	16,8	Net	0	survived	0	survived
17715	S. trutta	18,2	Net	0	survived	0	survived
16862	S. trutta	21,4	Turbine & Screen	0	survived	0	survived
90043	B. Barbus	8,2	Predamage	0	survived	NA	NA
90044	B. Barbus	8,0	Predamage	0	survived	NA	NA
90045	B. Barbus	9,7	Predamage	0	survived	NA	NA
90046	B. Barbus	9,3	Predamage	0	survived	NA	NA
90047	B. Barbus	8,1	Predamage	0	survived	NA	NA
90050	B. Barbus	8,3	Predamage	0	survived	NA	NA
90048	B. Barbus	7,7	Predamage	0	survived	NA	NA
90049	B. Barbus	8,4	Predamage	0	survived	NA	NA
90001	B. Barbus	7,8	Turbine & Screen	5	dead	NA	NA
90002	B. Barbus	9,4	Turbine & Screen	5	dead	NA	NA
90003	B. Barbus	8,4	Turbine & Screen	5	dead	NA	NA
90004	B. Barbus	8,7	Turbine & Screen	5	dead	NA	NA
90005	B. Barbus	8,3	Turbine & Screen	5	dead	NA	NA
90006	B. Barbus	7,8	Turbine & Screen	5	dead	NA	NA
90007	B. Barbus	9,2	Turbine & Screen	0	survived	NA	NA
90024	B. Barbus	7,7	Turbine & Screen	0	survived	NA	NA
90025	B. Barbus	9,0	Turbine & Screen	0	survived	NA	NA
90026	B. Barbus	8,6	Turbine & Screen	0	survived	NA	NA
90027	B. Barbus	9,5	Turbine & Screen	0	survived	NA	NA
90029	B. Barbus	9,9	Turbine & Screen	0	survived	NA	NA
90030	B. Barbus	8,2	Turbine & Screen	0	survived	NA	NA
90031	B. Barbus	7,7	Turbine & Screen	0	survived	NA	NA
90032	B. Barbus	9,0	Turbine & Screen	0	survived	NA	NA
90033	B. Barbus	8,3	Turbine & Screen	5	dead	NA	NA
90034	B. Barbus	16,3	Turbine & Screen	0	survived	NA	NA
90035	B. Barbus	8,5	Turbine & Screen	5	dead	NA	NA
90051	B. Barbus	16,6	Turbine & Screen	0	survived	NA	NA
90052	B. Barbus	15,0	Turbine & Screen	0	survived	NA	NA
90053	B. Barbus	16,4	Turbine & Screen	0	survived	NA	NA
90054	B. Barbus	16,4	Turbine & Screen	0	survived	NA	NA
90055	B. Barbus	9,7	Turbine & Screen	0	survived	NA	NA
90056	B. Barbus	8,9	Turbine & Screen	0	survived	NA	NA
90057	B. Barbus	16,7	Turbine & Screen	5	dead	NA	NA
90058	B. Barbus	9,4	Turbine & Screen	5	dead	NA	NA
90059	B. Barbus	8,3	Turbine & Screen	5	dead	NA	NA
90061	B. Barbus	8,3	Turbine & Screen	5	dead	NA	NA
90062	B. Barbus	8,3	Turbine & Screen	5	dead	NA	NA
90063	B. Barbus	8,5	Turbine & Screen	5	dead	NA	NA
90064	B. Barbus	8,5	Turbine & Screen	5	dead	NA	NA
90065	B. Barbus	8,1	Turbine & Screen	5	dead	NA	NA
90066	B. Barbus	9,3	Turbine & Screen	5	dead	NA	NA
90067	B. Barbus	9,4	Turbine & Screen	5	dead	NA	NA
90068	B. Barbus	8,3	Turbine & Screen	5	dead	NA	NA
90069	B. Barbus	9,9	Turbine & Screen	5	dead	NA	NA
90070	B. Barbus	9,5	Turbine & Screen	5	dead	NA	NA
90071	B. Barbus	7,9	Turbine & Screen	5	dead	NA	NA
90072	B. Barbus	9,5	Turbine & Screen	5	dead	NA	NA
90073	B. Barbus	8,8	Turbine & Screen	5	dead	NA	NA
90074	B. Barbus	10,0	Turbine & Screen	5	dead	NA	NA
90075	B. Barbus	9,6	Turbine & Screen	5	dead	NA	NA
90076	B. Barbus	8,4	Turbine & Screen	5	dead	NA	NA
90077	B. Barbus	8,3	Turbine & Screen	5	dead	NA	NA
90078	B. Barbus	8,1	Turbine & Screen	5	dead	NA	NA
90079	B. Barbus	9,0	Turbine & Screen	5	dead	NA	NA
90080	B. Barbus	10,9	Turbine & Screen	5	dead	NA	NA
90081	B. Barbus	8,2	Turbine & Screen	5	dead	NA	NA
90082	B. Barbus	7,9	Turbine & Screen	5	dead	NA	NA
90083	B. Barbus	8,2	Turbine & Screen	5	dead	NA	NA
90084	B. Barbus	8,5	Turbine & Screen	5	dead	NA	NA
90085	B. Barbus	9,5	Turbine & Screen	5	dead	NA	NA
90086	B. Barbus	9,0	Turbine & Screen	5	dead	NA	NA
90119	B. Barbus	7,7	Turbine & Screen	5	dead	NA	NA
90120	B. Barbus	8,5	Turbine & Screen	5	dead	NA	NA
90121	B. Barbus	9,2	Turbine & Screen	5	dead	NA	NA
90122	B. Barbus	8,4	Turbine & Screen	0	survived	NA	NA
90123	B. Barbus	8,7	Turbine & Screen	5	dead	NA	NA
90124	B. Barbus	8,7	Turbine & Screen	5	dead	NA	NA
90125	B. Barbus	8,1	Turbine & Screen	5	dead	NA	NA
90126	B. Barbus	9,0	Turbine & Screen	5	dead	NA	NA
90127	B. Barbus	9,7	Turbine & Screen	5	dead	NA	NA
90128	B. Barbus	11,3	Turbine & Screen	5	dead	NA	NA
90129	B. Barbus	8,5	Turbine & Screen	5	dead	NA	NA
90009	B. Barbus	17,1	Net	0	survived	NA	NA
90010	B. Barbus	17,8	Net	0	survived	NA	NA
90011	B. Barbus	18,0	Net	0	survived	NA	NA
90012	B. Barbus	17,6	Net	0	survived	NA	NA
90013	B. Barbus	18,3	Net	0	survived	NA	NA
90015	B. Barbus	9,4	Net	0	survived	NA	NA
90016	B. Barbus	8,7	Net	0	survived	NA	NA
90017	B. Barbus	7,6	Net	0	survived	NA	NA
90018	B. Barbus	8,5	Net	0	survived	NA	NA
90019	B. Barbus	9,2	Net	0	survived	NA	NA
90020	B. Barbus	10,0	Net	0	survived	NA	NA
90021	B. Barbus	9,0	Net	0	survived	NA	NA
90022	B. Barbus	10,3	Net	0	survived	NA	NA
90023	B. Barbus	8,8	Net	0	survived	NA	NA

## Sheet: Indicators
	Body part rough	Classification
Vitality0h	Vitality	Vitality
Vitality96h	Vitality	Vitality
Anal_fin_Amputations	Fins	External injuries
Anal_fin_Tears	Fins	External injuries
Anal_fin_Hemorrhages	Fins	External injuries
Anal_fin_Pigment_anomalies	Fins	External injuries
Anal_fin_Emboli	Fins	External injuries
Eye_right_Amputations	Eye	External injuries
Eye_right_Hemorrhages	Eye	External injuries
Eye_right_Bruises	Eye	External injuries
Eye_right_Emboli	Eye	External injuries
Eye_left_Amputations	Eye	External injuries
Eye_left_Hemorrhages	Eye	External injuries
Eye_left_Bruises	Eye	External injuries
Eye_left_Emboli	Eye	External injuries
Ventral_fin_right_Amputations	Fins	External injuries
Ventral_fin_right_Tears	Fins	External injuries
Ventral_fin_right_Hemorrhages	Fins	External injuries
Ventral_fin_right_Emboli	Fins	External injuries
Ventral_fin_right_Pigment_anomalies	Fins	External injuries
Ventral_fin_left_Amputations	Fins	External injuries
Ventral_fin_left_Tears	Fins	External injuries
Ventral_fin_left_Hemorrhages	Fins	External injuries
Ventral_fin_left_Emboli	Fins	External injuries
Ventral_fin_left_Pigment_anomalies	Fins	External injuries
Pectoral_fin_right_Amputations	Fins	External injuries
Pectoral_fin_right_Tears	Fins	External injuries
Pectoral_fin_right_Hemorrhages	Fins	External injuries
Pectoral_fin_right_Pigment_anomalies	Fins	External injuries
Pectoral_fin_right_Emboli	Fins	External injuries
Pectoral_fin_left_Amputations	Fins	External injuries
Pectoral_fin_left_Tears	Fins	External injuries
Pectoral_fin_left_Hemorrhages	Fins	External injuries
Pectoral_fin_left_Pigment_anomalies	Fins	External injuries
Pectoral_fin_left_Emboli	Fins	External injuries
Operculum_left_Amputations	Head	External injuries
Operculum_left_Hemorrhages	Head	External injuries
Operculum_left_Bruises	Head	External injuries
Operculum_left_Dermal_lesions	Head	External injuries
Operculum_left_Pigment_anomalies	Head	External injuries
Operculum_right_Amputations	Head	External injuries
Operculum_right_Hemorrhages	Head	External injuries
Operculum_right_Bruises	Head	External injuries
Operculum_right_Dermal_lesions	Head	External injuries
Operculum_right_Pigment_anomalies	Head	External injuries
Head_Amputations	Head	External injuries
Head_Hemorrhages	Head	External injuries
Head_Bruises	Head	External injuries
Head_Dermal_lesions	Head	External injuries
Head_Pigment_anomalies	Head	External injuries
Body_dorsal_Spine_deflection	Body	External injuries
Body_ventral_Hemorrhages	Body	External injuries
Body_ventral_Dermal_lesions	Body	External injuries
Body_ventral_Pigment_anomalies	Body	External injuries
Body_left_hinten_Schuppenverlust	Body	External injuries
Body_left_hinten_Hemorrhages	Body	External injuries
Body_left_hinten_Bruises	Body	External injuries
Body_left_hinten_Dermal_lesions	Body	External injuries
Body_left_hinten_Pigment_anomalies	Body	External injuries
Body_left_hinten_Amputations	Body	External injuries
Body_right_hinten_Schuppenverlust	Body	External injuries
Body_right_hinten_Hemorrhages	Body	External injuries
Body_right_hinten_Bruises	Body	External injuries
Body_right_hinten_Dermal_lesions	Body	External injuries
Body_right_hinten_Amputations	Body	External injuries
Body_right_hinten_Pigment_anomalies	Body	External injuries
Body_left_vorne_Schuppenverlust	Body	External injuries
Body_left_vorne_Hemorrhages	Body	External injuries
Body_left_vorne_Bruises	Body	External injuries
Body_left_vorne_Dermal_lesions	Body	External injuries
Body_left_vorne_Pigment_anomalies	Body	External injuries
Body_left_vorne_Amputations	Body	External injuries
Body_right_vorne_Schuppenverlust	Body	External injuries
Body_right_vorne_Hemorrhages	Body	External injuries
Body_right_vorne_Bruises	Body	External injuries
Body_right_vorne_Dermal_lesions	Body	External injuries
Body_right_vorne_Pigment_anomalies	Body	External injuries
Body_right_vorne_Amputations	Body	External injuries
Dorsal_fin_Amputations	Fins	External injuries
Dorsal_fin_Tears	Fins	External injuries
Dorsal_fin_Hemorrhages	Fins	External injuries
Dorsal_fin_Pigment_anomalies	Fins	External injuries
Dorsal_fin_Emboli	Fins	External injuries
Caudal_fin_Amputations	Fins	External injuries
Caudal_fin_Tears	Fins	External injuries
Caudal_fin_Hemorrhages	Fins	External injuries
Caudal_fin_Pigment_anomalies	Fins	External injuries
Caudal_fin_Emboli	Fins	External injuries
Head_Skeleton_Fractures	Head Bony strucutre	Internal injuries
Head_Skeleton_Deformations	Head Bony strucutre	Internal injuries
Head_Connective_tissue_Emboli	Head connective tissue	Internal injuries
Head_Connective_tissue_Fluid_accumulations	Head connective tissue	Internal injuries
Head_Connective_tissue_Radiopaque_materials	Head connective tissue	Internal injuries
Eye_Emboli	Eye	Internal injuries
Eye_Fluid_accumulations	Eye	Internal injuries
Cervical_spine_Fractures	Spine	Internal injuries
Cervical_spine_Deformations	Spine	Internal injuries
Cervical_spine_Compressions	Spine	Internal injuries
Spinous_process_Cervical_spine_Fractures	Body Bony structure	Internal injuries
Spinous_process_Cervical_spine_Deformations	Body Bony structure	Internal injuries
Fusiform_spine_Fractures	Spine	Internal injuries
Fusiform_spine_Deformations	Spine	Internal injuries
Fusiform_spine_Compressions	Spine	Internal injuries
Spinous_process_Fusiform_spine_Fractures	Spine	Internal injuries
Spinous_process_Fusiform_spine_Deformations	Spine	Internal injuries
Ribs_Fractures	Body Bony structure	Internal injuries
Ribs_Deformations	Body Bony structure	Internal injuries
Fin_beams_Fractures	Fins Bony structure	Internal injuries
Fin_beams_Deformations	Fins Bony structure	Internal injuries
Thorax_Body_cavity_Emboli	Body cavity	Internal injuries
Thorax_Body_cavity_Fluid_accumulations	Body cavity	Internal injuries
Thorax_Body_cavity_Radiopaque_materials	Body cavity	Internal injuries
Thorax_Connective_tissue_Emboli	Body connective tissue	Internal injuries
Thorax_Connective_tissue_Fluid_accumulations	Body connective tissue	Internal injuries
Thorax_Connective_tissue_Radiopaque_materials	Body connective tissue	Internal injuries
Swim_bladder_deflation_inflation	Swim bladder	Internal injuries
Caudal_spine_Fractures	Spine	Internal injuries
Caudal_spine_Deformations	Spine	Internal injuries
Caudal_spine_Compressions	Spine	Internal injuries
Spinous_process_Caudal_spine_Fractures	Body Bony structure	Internal injuries
Spinous_process_Caudal_spine_Deformations	Body Bony structure	Internal injuries
Caudal_area_Connective_tissue_Emboli	Body connective tissue	Internal injuries
Caudal_area_Connective_tissue_Fluid_accumulations	Body connective tissue	Internal injuries
Caudal_area_Connective_tissue_Radiopaque_materials	Body connective tissue	Internal injuries
